# Supplementary material for: Metabolic imprint induced by seed halo-priming promotes a differential physiological performance in two contrasting quinoa ecotypes
Source: Front Plant Sci. 2023 Feb 14;13:1034788. doi: 10.3389/fpls.2022.1034788 (PMC9971973; doi:10.3389/fpls.2022.1034788)
Supplement: Dataset 1 — The file shows the metabolome data obtained from the West Coast Metabolomics Center (UC Davis, Davis, CA, USA) using leaves of juvenile plants of two ecotypes of Quinoa subjected to seed priming (UP or HP) and grown under Control or saline stress conditions. [file DataSheet_1.xlsx]

## Sheet: submit
							file id	160719bOEsa09_2	160719bOEsa31_2	160719bOEsa40_1	160719bOEsa03_2	160719bOEsa23_1	160719bOEsa41_1	160719bOEsa25_1	160719bOEsa42_1	160719bOEsa38_1	160719bOEsa07_2	160719bOEsa11_2	160719bOEsa46_1	160719bOEsa28_1	160719bOEsa35_1	160719bOEsa34_1	160719bOEsa43_1	160719bOEsa21_1	160719bOEsa13_2	160719bOEsa47_1	160719bOEsa15_2	160719bOEsa44_1	160719bOEsa10_2	160719bOEsa36_1	160719bOEsa08_2	160719bOEsa05_2	160719bOEsa22_1	160719bOEsa06_2	160719bOEsa01_2	160719bOEsa45_1	160719bOEsa04_2	160719bOEsa14_2	160719bOEsa39_1	160719bOEsa33_1	160719bOEsa02_2	160719bOEsa37_1	160719bOEsa19_1	160719bOEsa12_2	160719bOEsa48_1	160719bOEsa17_2	160719bOEsa26_1
							mx class	274843	274843	274843	274843	274843	274843	274843	274843	274843	274843	274854	274854	274854	274854	274854	274854	274854	274854	274854	274854	274865	274865	274865	274865	274865	274865	274865	274865	274865	274865	274876	274876	274876	274876	274876	274876	274876	274876	274876	274876
							mx sample	274844	274845	274846	274847	274848	274849	274850	274851	274852	274853	274860	274861	274862	274863	274864	274855	274856	274857	274858	274859	274866	274867	274868	274869	274870	274871	274872	274873	274874	274875	274877	274878	274879	274880	274881	274882	274883	274884	274885	274886
							label	BO78_001	BO78_002	BO78_003	BO78_004	BO78_005	Socaire _021	Socaire _022	Socaire _023	Socaire _024	Socaire _025	BO78_006	BO78_007	BO78_008	BO78_009	BO78_010	Socaire _026	Socaire _027	Socaire _028	Socaire _029	Socaire _030	BO78_016	BO78_017	BO78_018	BO78_019	BO78_020	Socaire _036	Socaire _037	Socaire _038	Socaire _039	Socaire _040	BO78_011	BO78_012	BO78_013	BO78_014	BO78_015	Socaire _031	Socaire _032	Socaire _033	Socaire _034	Socaire _035
							comment	leaves With priming and with salt	leaves With priming and with salt	leaves With priming and with salt	leaves With priming and with salt	leaves With priming and with salt	leaves With priming and with salt	leaves With priming and with salt	leaves With priming and with salt	leaves With priming and with salt	leaves With priming and with salt	leaves With priming without salt	leaves With priming without salt	leaves With priming without salt	leaves With priming without salt	leaves With priming without salt	leaves With priming without salt	leaves With priming without salt	leaves With priming without salt	leaves With priming without salt	leaves With priming without salt	leaves Without priming and with salt	leaves Without priming and with salt	leaves Without priming and with salt	leaves Without priming and with salt	leaves Without priming and with salt	leaves Without priming and with salt	leaves Without priming and with salt	leaves Without priming and with salt	leaves Without priming and with salt	leaves Without priming and with salt	leaves Without priming without salt	leaves Without priming without salt	leaves Without priming without salt	leaves Without priming without salt	leaves Without priming without salt	leaves Without priming without salt	leaves Without priming without salt	leaves Without priming without salt	leaves Without priming without salt	leaves Without priming without salt
							species	Chenopodium quinoa	Chenopodium quinoa	Chenopodium quinoa	Chenopodium quinoa	Chenopodium quinoa	Chenopodium quinoa	Chenopodium quinoa	Chenopodium quinoa	Chenopodium quinoa	Chenopodium quinoa	Chenopodium quinoa	Chenopodium quinoa	Chenopodium quinoa	Chenopodium quinoa	Chenopodium quinoa	Chenopodium quinoa	Chenopodium quinoa	Chenopodium quinoa	Chenopodium quinoa	Chenopodium quinoa	Chenopodium quinoa	Chenopodium quinoa	Chenopodium quinoa	Chenopodium quinoa	Chenopodium quinoa	Chenopodium quinoa	Chenopodium quinoa	Chenopodium quinoa	Chenopodium quinoa	Chenopodium quinoa	Chenopodium quinoa	Chenopodium quinoa	Chenopodium quinoa	Chenopodium quinoa	Chenopodium quinoa	Chenopodium quinoa	Chenopodium quinoa	Chenopodium quinoa	Chenopodium quinoa	Chenopodium quinoa
							organ	leaves	leaves	leaves	leaves	leaves	leaves	leaves	leaves	leaves	leaves	leaves	leaves	leaves	leaves	leaves	leaves	leaves	leaves	leaves	leaves	leaves	leaves	leaves	leaves	leaves	leaves	leaves	leaves	leaves	leaves	leaves	leaves	leaves	leaves	leaves	leaves	leaves	leaves	leaves	leaves
							treatment	1 - leaves with priming and with salt	1 - leaves with priming and with salt	1 - leaves with priming and with salt	1 - leaves with priming and with salt	1 - leaves with priming and with salt	1 - leaves with priming and with salt	1 - leaves with priming and with salt	1 - leaves with priming and with salt	1 - leaves with priming and with salt	1 - leaves with priming and with salt	2 - leaves with priming without salt	2 - leaves with priming without salt	2 - leaves with priming without salt	2 - leaves with priming without salt	2 - leaves with priming without salt	2 - leaves with priming without salt	2 - leaves with priming without salt	2 - leaves with priming without salt	2 - leaves with priming without salt	2 - leaves with priming without salt	3 - leaves without priming and with salt	3 - leaves without priming and with salt	3 - leaves without priming and with salt	3 - leaves without priming and with salt	3 - leaves without priming and with salt	3 - leaves without priming and with salt	3 - leaves without priming and with salt	3 - leaves without priming and with salt	3 - leaves without priming and with salt	3 - leaves without priming and with salt	4 - leaves without priming without salt	4 - leaves without priming without salt	4 - leaves without priming without salt	4 - leaves without priming without salt	4 - leaves without priming without salt	4 - leaves without priming without salt	4 - leaves without priming without salt	4 - leaves without priming without salt	4 - leaves without priming without salt	4 - leaves without priming without salt
BinBase name	ret.index	quant mz	BB id	mass spec	KEGG	PubChem	InChI Key
xylulose NIST	553450	173	31632	85:1861.0 86:702.0 87:1148.0 88:324.0 89:10095.0 90:1041.0 91:452.0 94:60.0 95:96.0 96:155.0 97:114.0 98:195.0 99:528.0 100:1225.0 101:2618.0 102:774.0 103:9082.0 104:930.0 106:381.0 108:16.0 109:127.0 110:14.0 111:327.0 112:10.0 113:567.0 114:3170.0 115:1092.0 116:1102.0 117:15978.0 118:1867.0 119:1700.0 120:3.0 125:55.0 126:826.0 128:264.0 129:1798.0 130:91.0 131:1527.0 132:491.0 133:5046.0 134…	C00312	439205	LQXVFWRQNMEDEE-PYHARJCCSA-N	295	886	822	772	697	642	3633	2103	557	1117	1257	2014	1612	1468	1845	691	1042	2257	1474	1747	895	1142	1520	1775	1791	566	1434	2865	817	2105	337	1123	2242	1320	2011	1560	1742	877	2715	1084
xylose	543267	103	169	86:77.0 87:118.0 89:838.0 90:80.0 91:46.0 94:19.0 96:63.0 98:48.0 99:37.0 100:186.0 101:192.0 102:469.0 103:7719.0 104:659.0 105:379.0 106:26.0 112:23.0 114:254.0 115:75.0 117:652.0 118:60.0 119:80.0 120:23.0 121:17.0 124:30.0 127:70.0 128:49.0 129:515.0 130:102.0 131:344.0 133:894.0 134:104.0 135:66.0 137:49.0 142:48.0 143:43.0 144:51.0 145:65.0 147:2699.0 148:283.0 149:250.0 151:31.0 155:21.0 1…	C00181	135191	SRBFZHDQGSBBOR-IOVATXLUSA-N	3845	5841	7109	5045	5822	4743	21744	17204	7650	13552	9432	13937	10622	3522	14385	4200	14549	25137	11302	17689	6006	6710	8952	11816	10293	8114	18438	21102	10213	16265	6213	7814	12016	13268	11447	13955	20362	8028	23039	14875
xylonic acid	589278	333	3470	85:12.0 86:132.0 87:283.0 88:40.0 89:385.0 90:10.0 91:255.0 96:912.0 97:35.0 98:139.0 100:294.0 101:56.0 102:461.0 103:5264.0 104:405.0 105:101.0 107:132.0 108:89.0 113:617.0 114:30.0 116:195.0 117:279.0 118:58.0 120:212.0 123:262.0 124:390.0 126:43.0 127:52.0 128:2.0 129:1391.0 130:484.0 131:451.0 133:860.0 134:67.0 141:97.0 142:150.0 143:807.0 144:742.0 145:116.0 146:875.0 147:4046.0 148:465.0 …	C00502	6602431	QXKAIJAYHKCRRA-FLRLBIABSA-N	370	609	658	425	453	598	2029	1658	844	1336	640	1105	928	975	1879	553	747	1404	1627	2465	444	556	876	773	712	748	1816	2321	47	1575	694	688	940	1113	574	1774	1611	885	1886	1552
xylitol	567437	217	5857	85:22.0 87:53.0 88:95.0 89:312.0 94:15.0 99:38.0 101:376.0 103:3875.0 104:345.0 105:78.0 107:25.0 108:24.0 110:68.0 113:18.0 115:63.0 116:117.0 117:1418.0 118:103.0 119:73.0 129:1604.0 130:163.0 131:367.0 132:26.0 133:712.0 135:29.0 142:33.0 143:88.0 147:3295.0 148:560.0 149:319.0 155:12.0 157:214.0 159:20.0 163:58.0 169:22.0 171:40.0 175:99.0 182:58.0 189:476.0 190:74.0 191:333.0 192:19.0 193:15…	C00379	6912	HEBKCHPVOIAQTA-NGQZWQHPSA-N	127	192	174	192	172	121	314	187	139	209	239	367	281	6982	244	204	340	285	205	271	171	145	196	256	299	157	321	305	180	11882	267	186	268	257	191	274	211	219	423	392
xanthosine	926133	325	104466	85:67.0 86:155.0 87:150.0 88:146.0 89:671.0 93:64.0 95:58.0 97:44.0 98:90.0 99:197.0 100:550.0 101:133.0 103:3879.0 105:225.0 110:78.0 111:54.0 112:11.0 113:368.0 115:260.0 116:324.0 117:679.0 119:186.0 122:27.0 123:48.0 125:93.0 127:190.0 129:1315.0 131:290.0 133:738.0 134:188.0 135:75.0 141:43.0 142:136.0 143:165.0 144:243.0 145:138.0 146:15.0 147:4210.0 148:264.0 149:485.0 153:108.0 154:74.0 1…	C01762	64959	UBORTCNDUKBEOP-UUOKFMHZSA-N	87	117	99	85	165	153	187	165	98	101	166	74	128	149	118	131	114	105	171	136	105	126	111	80	169	118	111	90	111	136	131	125	123	182	112	131	159	114	121	214
vanillic acid	597845	297	16595	85:131.0 89:849.0 90:76.0 91:619.0 92:175.0 93:132.0 95:115.0 98:479.0 99:51.0 102:88.0 103:1501.0 104:166.0 105:538.0 106:42.0 107:324.0 109:223.0 110:100.0 111:1.0 112:7.0 113:5.0 117:953.0 119:173.0 120:75.0 121:296.0 122:117.0 123:121.0 125:7.0 126:1381.0 127:5.0 129:256.0 131:24.0 133:502.0 135:374.0 137:601.0 138:84.0 139:31.0 141:299.0 143:39.0 147:1397.0 148:616.0 149:333.0 150:109.0 151:…	C06672	8468	WKOLLVMJNQIZCI-UHFFFAOYSA-N	78	129	100	89	113	73	120	128	181	125	87	106	112	115	85	87	75	155	71	92	109	113	100	55	94	131	53	95	72	127	70	99	157	95	121	116	113	206	128	82
valine	313502	144	3	85:2124.0 86:7630.0 87:1944.0 88:1239.0 89:198.0 90:140.0 92:81.0 94:103.0 95:66.0 96:941.0 97:782.0 98:2720.0 99:1558.0 100:41058.0 101:6555.0 102:3952.0 103:6374.0 104:899.0 105:633.0 110:1390.0 111:263.0 112:2218.0 113:1055.0 114:6510.0 115:2943.0 116:1153.0 117:4102.0 118:1273.0 119:1387.0 120:34.0 121:95.0 122:89.0 123:66.0 124:112.0 125:82.0 126:230.0 128:5308.0 129:3668.0 130:4722.0 131:52…	C00183	6287	KZSNJWFQEVHDMF-BYPYZUCNSA-N	19731	37193	34946	32647	26349	19123	41265	39473	18093	39446	33035	66138	33174	30059	22768	18744	38925	18671	40731	41695	36855	38083	40435	50681	65496	39292	45279	53219	23076	69367	29260	26710	48962	67376	47486	36748	38112	24314	89280	66587
uridine-5-monophosphate	977896	169	1784	85:180.0 87:474.0 89:3.0 91:30.0 92:6.0 93:69.0 94:19.0 95:28.0 96:179.0 97:341.0 98:88.0 99:1859.0 100:832.0 101:611.0 102:163.0 103:179.0 109:47.0 111:144.0 112:43.0 113:642.0 114:33.0 115:313.0 116:272.0 117:260.0 118:11.0 119:34.0 120:8.0 123:3.0 124:38.0 125:169.0 126:247.0 127:111.0 128:23.0 129:1672.0 130:150.0 131:380.0 132:13.0 133:1055.0 134:73.0 135:313.0 137:161.0 139:17.0 140:299.0 1…	C00105	6030	DJJCXFVJDGTHFX-XVFCMESISA-N	384	1581	1149	999	1335	540	1748	2056	1064	835	757	1515	2303	2145	2102	430	782	2113	1575	2902	1092	832	2081	2164	1865	1173	2503	2031	587	2310	2109	1895	3251	1605	2116	3689	1535	902	1855	2097
uridine	856646	224	145465	85:573.0 86:638.0 87:348.0 89:394.0 90:134.0 94:236.0 95:1000.0 96:205.0 98:1052.0 99:398.0 100:1355.0 101:602.0 103:1202.0 104:663.0 105:176.0 106:156.0 110:309.0 111:646.0 112:237.0 115:668.0 116:1432.0 117:6739.0 118:731.0 119:276.0 120:140.0 121:122.0 124:130.0 126:554.0 128:323.0 129:6515.0 130:1227.0 131:2735.0 132:2616.0 133:2547.0 134:182.0 135:137.0 136:93.0 138:21.0 140:147.0 142:522.0 …	C00299	6029	DRTQHJPVMGBUCF-XVFCMESISA-N	111	261	127	125	91	98	848	102	155	202	178	222	495	161	136	442	107	196	489	117	105	153	268	130	107	176	254	219	122	183	280	144	188	195	130	129	191	107	387	189
urea	329351	189	145496	85:26969.0 86:19557.0 87:47732.0 88:7879.0 89:4417.0 90:6104.0 96:5422.0 97:6640.0 98:7305.0 99:249318.0 100:117208.0 101:34638.0 102:16748.0 103:4447.0 104:3511.0 105:5403.0 106:731.0 111:17086.0 112:4517.0 113:13173.0 114:22944.0 115:22710.0 116:7984.0 119:4134.0 122:137.0 123:416.0 124:576.0 125:2110.0 126:1363.0 127:6260.0 128:465.0 129:5096.0 130:73624.0 131:42829.0 132:33985.0 133:23230.0 1…			XSQUKJJJFZCRTK-UHFFFAOYSA-N	736	1039	127	1455	1963	943	1636	1118	90	996	5348	3721	2634	4418	1234	834	3422	5953	2336	2462	2819	1706	2749	2868	3689	764	1044	2172	1801	2757	2844	2345	2821	7438	5514	2393	4662	1965	3844	1728
UDP-glucuronic acid	587601	217	7831	87:154.0 89:34.0 96:10.0 97:71.0 98:2.0 99:102.0 101:913.0 103:713.0 111:84.0 113:761.0 114:53.0 115:189.0 116:678.0 117:1036.0 118:23.0 120:1.0 124:3.0 128:50.0 129:1720.0 130:197.0 131:702.0 132:269.0 133:1146.0 134:40.0 135:54.0 141:21.0 142:1.0 143:1068.0 144:123.0 145:349.0 146:24.0 147:2345.0 148:317.0 149:145.0 157:154.0 159:13.0 169:322.0 171:136.0 175:127.0 185:29.0 187:46.0 188:4.0 189:…	C00167	17473	HDYANYHVCAPMJV-LXQIFKJMSA-N	876	2283	1728	1223	1429	1631	4787	376	1975	3213	2031	3979	512	1393	192	1147	1271	2190	2274	5392	1381	1681	2072	3075	3072	2154	4362	1388	2139	3876	1845	2576	668	2614	2923	3029	922	2738	4683	3587
tyrosine	671252	218	16	85:101.0 86:1059.0 87:458.0 89:659.0 90:823.0 91:1849.0 92:215.0 93:210.0 94:46.0 95:258.0 97:226.0 100:19804.0 101:2641.0 102:1366.0 103:1633.0 104:401.0 105:1066.0 107:424.0 113:79.0 115:546.0 116:116.0 117:900.0 118:715.0 119:703.0 120:181.0 121:365.0 123:63.0 124:32.0 125:60.0 128:317.0 129:136.0 130:2787.0 131:1381.0 132:2378.0 133:2406.0 135:1073.0 136:172.0 137:139.0 138:33.0 143:94.0 144:…	C00082	6057	OUYCCCASQSFEME-QMMMGPOBSA-N	5016	9036	12372	9038	10983	6125	37527	33914	6971	20772	17729	28754	23097	22265	17400	17696	27116	16096	22522	47859	7904	9218	12150	16088	18600	24308	22923	26707	17189	39354	13024	10752	19817	29934	11527	36273	61467	14699	86196	59124
tyramine	664737	174	17381	85:11423.0 86:497290.0 87:41826.0 88:17095.0 89:17977.0 90:14664.0 91:27350.0 92:2331.0 93:2206.0 94:330.0 95:3925.0 96:515.0 97:1154.0 98:878.0 99:5395.0 100:205535.0 101:29626.0 102:26271.0 103:11920.0 104:5738.0 105:13899.0 106:1612.0 107:5101.0 108:518.0 109:2410.0 110:608.0 111:694.0 112:272.0 113:5828.0 114:4885.0 115:9457.0 116:18813.0 117:32728.0 118:5975.0 119:8565.0 120:1487.0 121:7764.…	C00483	5610	DZGWFCGJZKJUFP-UHFFFAOYSA-N	1227	1520	1365	1816	1973	573	2761	2124	860	2217	2020	3891	3699	1558	2264	914	3020	3893	996	4437	1236	2042	2162	3232	4071	1944	2684	5145	723	3561	2758	1225	2773	4129	1024	3346	2826	1075	6664	3753
tryptophan	780482	202	14	86:650.0 87:425.0 89:261.0 100:3562.0 101:1584.0 102:1611.0 103:773.0 104:190.0 113:59.0 114:89.0 115:489.0 118:184.0 119:183.0 127:218.0 130:2243.0 131:264.0 132:923.0 133:652.0 144:250.0 145:420.0 146:217.0 147:2097.0 148:245.0 149:212.0 154:44.0 156:266.0 157:161.0 158:212.0 159:339.0 160:439.0 161:112.0 162:7.0 170:343.0 171:149.0 172:244.0 173:187.0 174:182.0 175:114.0 177:48.0 182:53.0 183:…	C00078	6305	QIVBCDIJIAJPQS-VIFPVBQESA-N	2705	4039	3496	4233	4867	2900	17141	14214	2799	8834	6002	11973	9768	9035	6820	8283	7993	7932	11171	20710	3737	4955	4495	7648	7987	8877	9231	13959	5852	14800	7054	4370	8826	14199	4636	13952	23983	6590	28743	24875
trehalose	948197	191	111823	85:94.0 98:34.0 99:34.0 103:3530.0 104:205.0 109:159.0 111:125.0 113:165.0 116:172.0 117:768.0 118:42.0 119:60.0 120:25.0 129:2648.0 130:212.0 131:480.0 132:80.0 133:615.0 135:78.0 139:73.0 140:35.0 147:3851.0 148:529.0 149:300.0 150:65.0 151:32.0 154:24.0 155:298.0 157:181.0 169:1745.0 170:122.0 171:166.0 173:76.0 174:14.0 177:56.0 181:35.0 189:344.0 190:84.0 191:3330.0 192:394.0 193:183.0 199:3…				260	941	200	598	285	196	5114	307	241	539	317	211	2170	718	288	1560	246	305	3374	420	212	375	333	905	1611	342	152	221	250	861	417	252	268	1391	394	314	423	183	3590	1389
tocopherol gamma-	1026121	223	4545	85:7.0 86:92.0 88:26.0 91:52.0 94:33.0 95:97.0 97:79.0 99:8.0 104:48.0 105:82.0 107:5.0 109:87.0 111:9.0 112:41.0 119:199.0 120:6.0 121:33.0 123:9.0 124:39.0 125:5.0 128:3.0 134:117.0 135:2.0 137:39.0 139:30.0 140:62.0 142:25.0 145:87.0 147:25.0 148:47.0 149:122.0 151:89.0 152:36.0 156:203.0 157:48.0 161:33.0 163:63.0 164:25.0 165:36.0 166:24.0 167:21.0 171:4.0 172:8.0 173:43.0 174:147.0 175:27.0…	C02483	92729	QUEDXNHFTDJVIY-DQCZWYHMSA-N	93	97	127	175	99	153	115	171	148	124	160	120	116	152	150	158	142	176	115	191	146	171	133	102	128	156	125	162	99	129	112	130	180	93	100	197	179	148	136	173
tocopherol alpha-	1067809	237	100	85:207.0 87:84.0 88:72.0 91:780.0 92:83.0 93:140.0 94:40.0 95:435.0 97:218.0 99:100.0 103:358.0 105:440.0 106:76.0 107:223.0 108:54.0 109:243.0 110:64.0 111:199.0 112:52.0 113:56.0 115:104.0 116:123.0 117:293.0 119:705.0 120:82.0 121:197.0 129:158.0 131:400.0 134:108.0 135:351.0 136:189.0 141:89.0 145:154.0 147:430.0 149:213.0 159:143.0 161:190.0 162:65.0 163:233.0 164:77.0 174:64.0 175:152.0 177…	C00376	638015	NCYCYZXNIZJOKI-OVSJKPMPSA-N	668	163	834	843	788	1277	1224	1610	1526	1096	586	682	125	580	1088	1155	1243	1261	1356	948	611	133	580	790	633	917	966	559	658	1163	816	107	747	163	562	1075	916	1117	971	1155
threonine	409568	218	26	85:1692.0 86:5629.0 87:4799.0 88:907.0 89:613.0 90:123.0 91:125.0 93:55.0 94:68.0 96:272.0 97:242.0 98:1238.0 99:967.0 100:21870.0 101:36969.0 102:6991.0 103:4765.0 104:575.0 105:736.0 106:101.0 111:100.0 112:872.0 113:501.0 114:4912.0 115:4479.0 116:1288.0 117:46070.0 118:5398.0 119:3251.0 120:305.0 121:156.0 126:135.0 128:12161.0 129:12490.0 130:8064.0 131:8458.0 132:8775.0 133:10819.0 134:1884…	C00188	6288	AYFVYJQAPQTCCC-GBXIJSLDSA-N	8731	13605	17279	13765	17954	8830	27504	24293	9387	17252	19275	21359	26193	22918	18509	7895	16085	15193	18199	26558	16712	15579	13220	29480	31539	13543	20007	23769	14094	26389	17912	17668	22970	25141	12008	17744	23607	8986	23837	23552
threonic acid	497572	292	172	86:78.0 87:500.0 88:136.0 89:1131.0 90:139.0 91:82.0 95:22.0 98:80.0 99:146.0 101:890.0 102:4177.0 103:5003.0 104:619.0 105:374.0 111:46.0 112:15.0 113:201.0 115:359.0 116:115.0 117:5872.0 118:496.0 119:430.0 121:39.0 128:64.0 129:1372.0 130:3055.0 131:1659.0 132:232.0 133:2893.0 134:460.0 135:237.0 136:30.0 141:29.0 143:619.0 144:80.0 145:104.0 147:16627.0 148:2848.0 149:2024.0 152:34.0 157:244.…	C01620	5460407	JPIJQSOTBSSVTP-STHAYSLISA-N	11898	18845	23464	14170	19377	17479	48902	47586	20359	35223	40041	47479	49371	43754	38862	15824	36235	45342	38044	47045	27552	28438	36049	47938	42600	24357	45716	53190	27326	52146	33468	29973	52005	49053	41909	51316	57619	22283	71624	51695
tagatose	631459	307	4833	85:334.0 87:230.0 88:1.0 89:7139.0 90:557.0 91:209.0 93:158.0 94:346.0 95:551.0 97:266.0 98:203.0 101:1898.0 103:15541.0 104:727.0 105:95.0 107:220.0 109:94.0 110:214.0 111:84.0 112:53.0 113:178.0 117:2074.0 118:87.0 120:300.0 121:119.0 123:192.0 124:85.0 125:12.0 126:15.0 128:153.0 129:1803.0 131:160.0 137:1.0 138:19.0 140:1895.0 141:1398.0 142:289.0 143:129.0 144:1676.0 145:382.0 147:616.0 150:…	C00795	439312	LKDRXBCSQODPBY-OEXCPVAWSA-N	15238	15779	22397	7411	10533	42184	148033	84723	53096	50568	26061	48139	46305	28368	79032	48908	100199	157376	195198	117965	14993	21297	21022	22599	1519	27092	131572	136440	63586	73745	31297	25326	37077	38825	28018	148969	94678	47226	196836	109713
sulfuric acid	282411	227	12266	85:304.0 87:1338.0 89:427.0 90:627.0 91:2568.0 92:299.0 93:437.0 94:219.0 95:38.0 98:17.0 100:576.0 102:801.0 103:2654.0 104:808.0 105:1171.0 106:909.0 107:6785.0 108:162.0 109:273.0 110:3976.0 114:441.0 115:1666.0 116:60.0 117:1133.0 118:2283.0 119:883.0 120:398.0 123:90.0 124:26.0 129:38.0 130:9958.0 131:5448.0 132:1296.0 133:3074.0 134:11823.0 135:2694.0 136:426.0 137:183.0 138:26.0 139:1384.0…	C00059	1118	QAOWNCQODCNURD-UHFFFAOYSA-N	103	6672	10278	89	5777	769	7164	3109	4523	124	92	10120	9319	10102	7075	198	6813	112	9986	92	519	118	10300	1340	721	5834	78	171	500	318	107	8233	17522	85	20630	175	140	6244	114	14696
sucrose	915139	271	173	85:319.0 87:314.0 88:197.0 89:406.0 91:85.0 92:24.0 94:41.0 97:89.0 99:203.0 100:65.0 101:688.0 102:331.0 103:8357.0 104:731.0 105:421.0 108:21.0 109:428.0 110:53.0 111:276.0 112:52.0 113:277.0 114:83.0 115:331.0 116:305.0 117:1934.0 118:199.0 119:119.0 122:42.0 124:17.0 125:110.0 127:383.0 128:152.0 129:5742.0 130:735.0 131:1008.0 132:97.0 133:1861.0 134:253.0 135:207.0 136:48.0 138:21.0 139:138…	C00089	5988	CZMRCDWAGMRECN-UGDNZRGBSA-N	169055	316116	358178	292698	321596	210271	351506	374119	256794	298299	336314	322068	289715	385219	337372	124345	309327	338861	280620	319274	294912	266515	369004	309044	354259	325189	331988	330485	307082	311140	322313	347202	404154	322770	342152	335136	341779	245375	301133	337315
succinic acid	370608	247	161	85:303.0 87:764.0 88:359.0 89:340.0 91:55.0 92:42.0 95:84.0 98:86.0 99:324.0 101:577.0 102:330.0 103:701.0 104:172.0 105:342.0 106:78.0 107:93.0 111:30.0 113:629.0 114:213.0 115:891.0 116:1231.0 117:1124.0 118:170.0 119:320.0 120:104.0 124:22.0 126:77.0 128:196.0 129:6064.0 130:1045.0 131:1466.0 132:345.0 133:2204.0 135:234.0 136:65.0 137:16.0 138:15.0 142:39.0 143:223.0 145:378.0 147:57887.0 148…	C00042	1110	KDYFGRWQOYBRFD-UHFFFAOYSA-N	2742	3932	3798	2733	5310	2878	9399	7040	3274	7937	8820	13017	10532	7753	7320	3376	7700	7469	9430	10007	4933	5226	7406	7842	8832	5042	9738	11013	6562	11695	9581	6818	10709	10312	6753	9591	11241	4157	15669	12492
stearic acid	787622	117	13	85:4191.0 86:1569.0 87:1271.0 88:840.0 89:3341.0 90:339.0 91:1247.0 92:198.0 93:2558.0 94:311.0 95:7043.0 96:882.0 97:6832.0 98:5171.0 99:2925.0 100:405.0 101:1507.0 102:583.0 103:508.0 104:58.0 105:3188.0 106:306.0 107:1125.0 108:164.0 109:2130.0 110:377.0 111:3168.0 112:1361.0 113:512.0 114:158.0 115:1020.0 116:7267.0 117:126653.0 118:11937.0 119:4908.0 120:246.0 121:958.0 122:149.0 123:575.0 1…	C01530	5281	QIQXTHQIDYTFRH-UHFFFAOYSA-N	48805	31953	32143	39270	27068	34179	28290	30363	37097	32103	35392	24481	28125	30451	28875	28781	28832	31345	34949	28315	34412	29274	30826	32059	30084	33047	32548	32615	27688	28795	38686	30219	31988	33627	31432	32858	27089	33354	31386	31703
squalene	976237	95	23042	85:30.0 86:24.0 89:29.0 91:1210.0 92:419.0 93:2657.0 94:934.0 95:3637.0 96:426.0 97:225.0 105:675.0 106:136.0 107:1531.0 108:365.0 109:1353.0 110:180.0 111:108.0 112:7.0 115:78.0 116:94.0 117:38.0 118:27.0 119:622.0 120:164.0 121:1823.0 122:370.0 123:1104.0 124:151.0 125:39.0 128:103.0 129:12.0 131:224.0 132:45.0 133:266.0 134:264.0 135:782.0 136:1304.0 137:1202.0 138:116.0 139:4.0 140:15.0 141:1…	C00751	638072	YYGNTYWPHWGJRM-AAJYLUCBSA-N	211	233	250	259	338	273	222	300	281	202	207	268	365	265	209	350	211	301	375	255	311	198	190	176	266	199	134	240	216	164	165	396	241	974	312	346	349	256	321	197
spermidine	792924	144	1714	86:2249.0 87:97.0 88:90.0 98:50.0 99:209.0 100:1315.0 101:269.0 102:322.0 103:48.0 112:85.0 114:376.0 115:652.0 116:3899.0 117:324.0 118:176.0 123:24.0 126:189.0 128:490.0 129:447.0 130:615.0 131:43.0 132:12.0 140:80.0 142:727.0 144:4737.0 145:505.0 146:609.0 154:339.0 155:8.0 156:1970.0 157:646.0 158:219.0 159:4.0 160:1566.0 161:106.0 162:47.0 168:3.0 170:695.0 171:46.0 172:1272.0 173:230.0 174:…	C00315	1102	ATHGHQPFGPMSJY-UHFFFAOYSA-N	211	83	124	166	135	77	507	331	174	569	271	441	229	132	114	411	61	767	746	785	128	211	149	214	268	186	1092	1482	150	779	343	126	81	380	172	2447	688	171	1705	1433
sophorose	965726	307	62354	85:151.0 86:519.0 87:288.0 88:271.0 89:4723.0 90:522.0 97:108.0 98:103.0 99:405.0 100:1535.0 101:1642.0 102:691.0 103:27499.0 104:2545.0 105:1508.0 106:130.0 108:1.0 109:574.0 110:112.0 111:141.0 112:249.0 113:203.0 114:318.0 115:670.0 116:1151.0 117:9467.0 118:1055.0 119:812.0 124:39.0 126:395.0 127:497.0 128:415.0 129:10332.0 130:1317.0 131:2651.0 132:350.0 133:5084.0 134:685.0 135:521.0 137:21…	C08250	441432	HIWPGCMGAMJNRG-BTLHAWITSA-N	168	191	138	142	89	116	110	95	175	109	280	282	193	354	139	83	86	143	96	106	121	312	259	126	194	112	54	142	85	96	227	202	82	128	358	196	150	105	87	87
shikimic acid	611100	204	286	85:149.0 87:51.0 89:152.0 90:30.0 91:290.0 92:189.0 93:498.0 94:99.0 95:323.0 96:150.0 97:191.0 98:58.0 99:248.0 100:45.0 101:676.0 103:796.0 104:122.0 105:435.0 107:157.0 108:97.0 109:114.0 111:293.0 112:57.0 113:62.0 114:60.0 115:150.0 116:435.0 117:504.0 118:76.0 119:240.0 121:261.0 122:62.0 123:242.0 125:205.0 126:81.0 128:58.0 131:777.0 132:71.0 133:2652.0 134:351.0 135:280.0 137:3.0 138:27.…	C00493	8742	JXOHGGNKMLTUBP-HSUXUTPPSA-N	1571	3236	2484	1270	2178	1478	3478	3320	1633	1907	4148	4904	5861	4057	3284	1859	1401	2735	5166	4207	2395	2364	3096	3546	2908	1661	2654	4299	1788	3316	4435	3337	5294	3645	3328	3663	4119	1626	3880	4730
serine	395020	218	25	85:536.0 86:1604.0 87:945.0 88:1874.0 89:1384.0 90:199.0 91:148.0 95:84.0 97:103.0 98:189.0 99:283.0 100:23226.0 101:3557.0 102:1780.0 103:3612.0 104:267.0 105:217.0 109:46.0 110:192.0 112:43.0 113:186.0 114:2146.0 115:2068.0 116:7090.0 117:3142.0 118:630.0 119:872.0 120:104.0 122:24.0 125:17.0 128:249.0 129:255.0 130:1752.0 131:2506.0 132:2800.0 133:5975.0 134:1177.0 135:499.0 141:90.0 142:206.0…	C00065	5951	MTCFGRXMJLQNBG-REOHCLBHSA-N	51209	141917	119740	97820	125712	36594	208105	178204	52746	117271	129470	157094	174468	160742	132042	52193	95660	64977	80132	154064	55136	56821	143364	188546	229269	109661	135127	153769	99309	178207	113044	104617	148848	105710	137106	107264	156495	47954	184840	183319
ribose-5-phosphate	733959	315	13110	85:545.0 86:474.0 87:1100.0 88:217.0 89:4256.0 90:401.0 91:47.0 92:99.0 93:205.0 94:204.0 95:156.0 97:190.0 98:333.0 99:784.0 100:491.0 101:2922.0 102:750.0 103:9773.0 104:376.0 105:702.0 106:146.0 109:53.0 111:403.0 112:959.0 113:1598.0 114:264.0 115:1101.0 116:1782.0 117:2668.0 118:97.0 119:1188.0 120:120.0 121:130.0 122:65.0 123:46.0 124:90.0 125:442.0 126:1382.0 127:181.0 128:1193.0 129:7905.…	C00117	439167	KTVPXOYAKDPRHY-SOOFDHNKSA-N	210	723	656	451	274	764	1152	1537	319	914	826	1167	989	410	2007	211	435	1709	929	1120	744	836	1136	1338	541	572	1129	2477	418	1098	985	937	1422	671	1727	1553	822	868	1283	657
ribose	553135	217	1662	85:8071.0 86:9472.0 87:11706.0 88:7002.0 89:91105.0 90:8121.0 91:4369.0 92:716.0 93:150.0 94:1908.0 95:1008.0 96:977.0 97:1171.0 98:3992.0 99:8420.0 100:38767.0 101:35431.0 102:21246.0 103:1062555.0 104:101843.0 105:73545.0 106:4592.0 107:540.0 108:433.0 109:560.0 110:342.0 111:3649.0 112:4750.0 113:10117.0 114:23592.0 115:17668.0 116:13805.0 117:109230.0 118:11975.0 119:17425.0 120:1771.0 121:10…	C00121	5779	HMFHBZSHGGEWLO-SOOFDHNKSA-N	437	948	992	745	770	694	4189	1489	819	1232	1481	1320	1112	1464	1768	1107	1249	1951	2035	1802	882	868	1676	1108	738	908	1886	2149	1116	2055	1205	1090	1730	1163	1552	1092	1874	884	3349	2221
ribitol	575497	217	7362	85:248.0 86:43.0 87:65.0 88:62.0 89:897.0 90:98.0 92:20.0 95:22.0 99:113.0 100:224.0 101:774.0 102:28.0 103:6316.0 104:624.0 105:415.0 107:35.0 109:433.0 110:374.0 111:71.0 112:1.0 113:273.0 114:80.0 115:19.0 116:274.0 117:7478.0 118:701.0 119:297.0 126:2.0 128:44.0 129:3713.0 130:874.0 131:1633.0 132:149.0 133:1838.0 134:180.0 135:129.0 136:1.0 140:1.0 142:152.0 143:478.0 145:98.0 146:11.0 147:7…	C00474	827	HEBKCHPVOIAQTA-ZXFHETKHSA-N	4034	11704	14130	8317	9205	5259	20550	16792	6694	13682	14652	15661	18054	14882	11411	6101	12124	13828	10558	16427	9388	9352	12122	17588	21712	10504	14646	16827	9781	17368	9727	12508	13752	18156	1778	11212	16142	8300	23142	16558
raffinose	1120886	361	3190	85:33.0 86:57.0 89:118.0 97:9.0 99:119.0 101:141.0 103:2918.0 104:200.0 109:167.0 113:29.0 115:39.0 116:161.0 117:590.0 119:118.0 127:20.0 129:3784.0 130:442.0 131:389.0 132:40.0 133:755.0 139:34.0 141:95.0 142:74.0 143:448.0 144:16.0 145:42.0 147:2732.0 148:202.0 149:232.0 150:2.0 153:60.0 155:407.0 156:35.0 157:463.0 158:48.0 159:18.0 161:17.0 162:10.0 163:129.0 169:2550.0 170:335.0 171:169.0 1…	C00492	439242	MUPFEKGTMRGPLJ-ZQSKZDJDSA-N	498	1799	1308	1194	719	401	1910	1214	607	2161	431	1332	1214	1316	1275	281	607	427	383	544	867	464	822	1966	2902	1078	1322	1980	895	1374	624	990	1090	1335	1154	405	383	125	571	704
pyruvic acid	211003	174	66	85:630.0 86:204.0 89:7216.0 90:673.0 91:371.0 92:530.0 93:30031.0 94:2061.0 95:11219.0 96:1648.0 97:859.0 98:280.0 99:3052.0 100:1713.0 101:1946.0 103:6049.0 104:661.0 105:194.0 108:69.0 109:190.0 113:98.0 114:299.0 115:3337.0 116:419.0 120:34.0 121:249.0 122:97.0 123:32537.0 124:2424.0 125:11002.0 126:932.0 140:64.0 141:56.0 145:163.0 158:558.0 159:315.0 161:150.0 163:309.0 164:86.0 165:1647.0 1…	C00022	1060	LCTONWCANYUPML-UHFFFAOYSA-N	1144	446	1013	950	1133	682	374	357	543	937	1065	77	380	1047	552	154	1034	1585	517	1505	477	646	921	772	698	899	459	570	189	1173	655	938	1016	1261	883	1114	1710	820	769	754
pyrophosphate	327517	110	88181	85:59.0 86:424.0 88:3996.0 89:1099.0 90:521.0 91:2992.0 92:542.0 93:556.0 94:176.0 95:7.0 98:486.0 99:22.0 100:644.0 101:127.0 102:321.0 103:699.0 104:316.0 105:878.0 106:720.0 107:2656.0 108:521.0 109:1698.0 110:90323.0 111:3584.0 113:74.0 114:44.0 115:1098.0 116:32.0 117:291.0 118:249.0 119:1334.0 120:399.0 121:1855.0 122:318.0 123:1116.0 124:21.0 125:322.0 131:709.0 132:202.0 133:5324.0 134:26…	C00013	1023	XPPKVPWEQAFLFU-UHFFFAOYSA-N	6538	8882	9784	8185	7557	3744	2123	4055	7530	8497	11208	5207	7654	12470	10721	2051	7823	7809	4007	17529	3293	9102	9360	4532	9209	7280	10715	14656	2222	9228	14600	10914	12734	10146	7291	18547	12870	5215	10922	6164
putrescine	588119	174	21703	85:624.0 86:17614.0 87:1954.0 88:701.0 95:37.0 96:1.0 97:93.0 98:646.0 99:2310.0 100:8640.0 101:1171.0 102:973.0 103:9.0 110:382.0 111:26.0 112:811.0 113:463.0 114:1772.0 115:664.0 116:1599.0 117:894.0 118:197.0 124:16.0 125:39.0 126:2092.0 127:226.0 128:1088.0 129:243.0 130:4521.0 131:1582.0 132:862.0 140:655.0 141:77.0 142:1872.0 143:265.0 144:500.0 145:66.0 146:2422.0 153:32.0 156:175.0 158:65…	C00138	1049	KIDHWZJUCRJVML-UHFFFAOYSA-N	1327	1279	1124	1221	628	556	1888	950	1313	1860	1681	1782	1663	1262	1484	872	2798	3764	1496	3822	873	1498	1356	1350	1536	1033	2122	2458	817	1678	3158	2416	2640	1464	1618	5006	2162	1580	2991	2671
propane-1,3-diol NIST	214380	177	282	85:801.0 86:145.0 87:673.0 99:342.0 100:269.0 101:1134.0 102:390.0 103:1442.0 104:191.0 105:263.0 113:55.0 115:7165.0 116:474.0 119:330.0 129:59.0 130:5199.0 131:1969.0 133:1784.0 135:367.0 145:32.0 147:17505.0 148:2962.0 149:1307.0 150:157.0 151:34.0 163:52.0 164:30.0 176:36.0 177:1417.0 178:147.0 179:81.0 180:21.0 183:38.0 186:23.0 192:22.0 201:32.0 203:21.0 205:278.0 213:45.0 227:17.0 231:24.0…	C02457	10442	YPFDHNVEDLHUCE-UHFFFAOYSA-N	706	504	663	635	979	668	555	683	674	713	472	431	392	617	663	505	607	704	721	494	526	362	400	720	743	666	616	669	576	715	448	753	741	372	611	439	507	592	660	244
proline	364716	142	8	85:2056.0 86:1998.0 87:940.0 88:328.0 89:338.0 90:51.0 92:149.0 94:210.0 95:311.0 96:577.0 97:573.0 98:1498.0 99:2820.0 100:4125.0 101:1740.0 102:731.0 103:1654.0 104:106.0 105:427.0 106:176.0 107:465.0 108:67.0 109:52.0 110:311.0 111:232.0 112:301.0 113:996.0 114:329.0 115:1985.0 116:429.0 117:1213.0 118:146.0 119:466.0 120:44.0 121:71.0 122:64.0 123:52.0 124:625.0 125:120.0 126:878.0 127:934.0 …	C00148	145742	ONIBWKKTOPOVIA-BYPYZUCNSA-N	1655	5546	4476	4097	3154	4898	9702	11110	1434	5556	4164	24871	4011	2375	2884	3501	8050	1405	12606	3542	9388	5591	5457	9447	17214	11561	6603	8247	5058	3559	3580	2313	4305	16244	4999	2275	4109	5043	12303	15671
phytol	761712	143	3192	85:289.0 86:126.0 88:244.0 89:421.0 93:8.0 95:309.0 96:270.0 97:141.0 98:162.0 99:186.0 100:115.0 101:841.0 102:38.0 103:473.0 105:22.0 107:75.0 109:125.0 111:146.0 112:77.0 113:127.0 115:76.0 116:79.0 117:326.0 118:190.0 121:37.0 122:27.0 123:538.0 124:112.0 126:124.0 129:259.0 130:97.0 131:412.0 132:89.0 133:199.0 134:256.0 139:46.0 141:49.0 143:5116.0 144:663.0 145:148.0 147:569.0 149:92.0 155…	C01389	5280435	BOTWFXYSPFMFNR-PYDDKJGSSA-N	4475	4434	3303	3327	2980	3363	2041	3816	3652	2174	2454	2017	2414	3372	2333	2940	3251	2468	2775	2793	4402	3381	3091	3353	3755	2600	2311	3220	2537	1374	3397	3389	3387	3172	3037	2870	2222	2875	2485	3043
phosphoethanolamine	604335	299	41988	85:4482.0 86:63617.0 87:12014.0 88:3644.0 89:3383.0 90:821.0 91:1349.0 92:430.0 93:340.0 94:5.0 95:45.0 96:789.0 97:261.0 98:2892.0 99:2491.0 100:203982.0 101:23440.0 102:10502.0 103:8600.0 104:1871.0 105:4659.0 106:990.0 107:3114.0 108:204.0 109:543.0 111:145.0 112:388.0 113:3848.0 114:98861.0 115:59768.0 116:15091.0 117:9619.0 118:1800.0 119:8190.0 120:1538.0 121:5493.0 122:606.0 123:1961.0 124…	C00346	1015	SUHOOTKUPISOBE-UHFFFAOYSA-N	112	311	526	916	60	108	370	118	387	941	234	209	686	801	448	75	624	409	108	1091	106	295	733	1904	1767	445	1232	899	151	1172	735	564	522	1277	687	1487	480	134	471	394
phosphoenolpyruvate	518184	211	1685	85:722.0 87:475.0 88:135.0 89:540.0 91:470.0 92:190.0 93:453.0 94:75.0 95:114.0 98:478.0 99:505.0 100:235.0 101:256.0 102:52.0 103:1316.0 104:188.0 105:852.0 106:273.0 107:249.0 108:154.0 109:372.0 111:44.0 112:32.0 113:98.0 114:132.0 115:2290.0 116:478.0 117:879.0 118:282.0 119:1600.0 120:274.0 121:1440.0 122:140.0 123:412.0 124:34.0 126:75.0 128:64.0 129:1559.0 130:357.0 131:2281.0 132:277.0 13…				575	323	810	624	984	519	474	677	477	505	1019	837	464	1345	585	62	899	621	192	1347	826	782	855	1216	1217	656	706	964	675	798	636	1296	1346	1026	1068	1184	1608	580	174	561
phosphate	345365	314	4	85:2157.0 86:4845.0 87:5305.0 88:1544.0 89:6178.0 90:913.0 91:5486.0 92:639.0 93:1090.0 94:256.0 95:178.0 96:901.0 97:221.0 98:1216.0 99:626.0 100:3524.0 103:17906.0 104:4250.0 105:12326.0 106:1911.0 107:7514.0 108:751.0 109:2429.0 110:239.0 112:225.0 113:1044.0 114:607.0 115:23611.0 116:3246.0 117:2166.0 118:1082.0 119:15220.0 120:2183.0 121:11456.0 122:1330.0 123:5152.0 124:478.0 125:397.0 126:…	C00009	1004	NBIIXXVUZAFLBC-UHFFFAOYSA-N	25927	34995	25492	30997	51631	20371	58423	51380	31278	40113	71461	9224	107759	75316	38592	28282	28525	58039	56340	61700	50001	46616	65151	70124	69239	21004	47928	50467	27641	52849	60275	52773	77083	83205	64436	59055	55162	22629	58744	52436
phenylethylamine	513300	174	16890	86:5896.0 87:600.0 88:548.0 90:188.0 91:2636.0 92:206.0 93:1.0 97:1.0 98:48.0 99:129.0 100:2765.0 101:192.0 102:109.0 103:2633.0 104:279.0 107:378.0 108:74.0 110:55.0 113:65.0 114:106.0 116:481.0 121:196.0 122:31.0 124:2.0 127:165.0 128:135.0 129:158.0 130:745.0 134:29.0 135:9.0 139:10.0 143:120.0 144:297.0 146:47.0 155:163.0 158:53.0 160:164.0 161:9.0 162:213.0 172:80.0 174:6708.0 175:987.0 176:…	C05332	1001	BHHGXPLMPWCGHP-UHFFFAOYSA-N	14276	92238	22671	45968	38088	23589	143723	95295	4647	60739	18152	10446	56428	36292	48474	13406	11518	10819	29200	38341	58781	25372	57565	85424	125543	28514	42021	74831	22989	95511	20112	16398	41876	31603	39820	11512	12196	5271	15627	49222
phenylalanine	537804	218	33	85:116.0 86:960.0 87:386.0 88:130.0 89:524.0 90:333.0 91:7394.0 92:957.0 93:245.0 95:80.0 97:48.0 98:130.0 99:52.0 100:9746.0 101:1177.0 102:805.0 103:1034.0 104:243.0 105:388.0 107:71.0 113:39.0 114:39.0 115:219.0 116:165.0 117:780.0 118:464.0 119:424.0 120:416.0 121:430.0 122:59.0 123:39.0 129:97.0 130:1679.0 131:1133.0 132:1341.0 133:1146.0 134:336.0 135:293.0 136:49.0 138:34.0 139:49.0 140:25…	C00079	6140	COLNVLDHVKWLRT-QMMMGPOBSA-N	13567	18787	18769	10791	20092	6622	30248	27748	7940	14386	30573	38888	31436	35709	18833	13679	21436	14016	23538	38250	17049	20071	25939	26814	24471	18626	22324	26350	16223	27041	26981	18200	40120	30987	23980	27198	38638	11017	43861	28534
phenol	218927	151	31889	91:2045.0 92:161.0 93:334.0 94:209.0 95:2491.0 96:415.0 97:231.0 105:135.0 106:56.0 110:100.0 111:75.0 112:21.0 120:80.0 121:643.0 122:37.0 123:637.0 124:89.0 125:41.0 131:307.0 132:52.0 134:140.0 135:1287.0 136:193.0 137:125.0 145:37.0 149:73.0 150:28.0 151:15374.0 152:2150.0 153:646.0 154:68.0 166:3125.0 167:465.0 168:102.0 170:10.0 174:109.0 189:40.0 246:20.0 287:37.0 300:22.0 317:16.0 324:18.…	C00146	996	ISWSIDIOOBJBQZ-UHFFFAOYSA-N	1214	1093	1305	1158	1122	1101	1012	871	1090	1122	1287	1153	1146	1223	1162	1089	1108	1147	1147	1236	985	1272	996	1191	1045	712	1122	1035	988	1104	1152	1157	1169	1231	1163	961	1208	1140	1066	925
pentono-1,4-lactone	587644	102	84205	85:175.0 87:358.0 88:135.0 89:4819.0 90:326.0 91:101.0 92:46.0 94:18.0 95:47.0 98:1.0 99:225.0 101:2113.0 102:10373.0 103:1543.0 104:394.0 105:30.0 106:3.0 110:39.0 111:55.0 113:383.0 114:52.0 115:363.0 116:321.0 117:464.0 118:20.0 119:414.0 120:22.0 127:193.0 128:194.0 129:1257.0 130:6424.0 131:1281.0 132:376.0 133:3172.0 134:350.0 135:282.0 139:1.0 140:1.0 141:171.0 142:154.0 143:2068.0 144:153…	C02674	161815	YIXDEYPPAGPYDP-IUYQGCFVSA-N	481	1275	493	477	549	895	955	1206	897	972	998	802	1245	314	1275	2312	298	1232	2524	1117	635	576	799	691	362	315	1408	1307	624	933	2062	866	955	881	656	1202	1073	935	2203	2022
pentitol	561721	307	16624	89:382.0 90:32.0 93:12.0 100:127.0 101:141.0 102:57.0 103:5552.0 104:377.0 105:31.0 110:101.0 113:98.0 115:27.0 117:1218.0 118:90.0 119:10.0 127:172.0 129:3002.0 130:931.0 131:555.0 133:909.0 134:160.0 141:20.0 143:185.0 144:135.0 147:4361.0 148:471.0 149:548.0 151:61.0 153:6.0 157:1007.0 158:82.0 159:54.0 161:29.0 163:129.0 171:32.0 173:7.0 175:78.0 177:56.0 184:126.0 186:4.0 187:24.0 189:406.0 …	D00061	827	HEBKCHPVOIAQTA-UHFFFAOYSA-N	2074	4909	5222	4517	4010	4015	12043	11525	4771	8118	3318	5056	7810	5838	7703	3635	5752	8674	7740	10931	4632	4591	5535	8089	9070	6464	9404	11653	6152	10063	4661	6553	6748	6589	7054	4630	8387	4881	11747	9112
pelargonic acid	399229	117	50	85:95.0 86:236.0 88:109.0 89:242.0 90:68.0 94:18.0 95:61.0 96:43.0 98:137.0 99:208.0 101:214.0 102:71.0 105:367.0 116:364.0 117:7457.0 118:623.0 119:191.0 123:20.0 128:63.0 129:2753.0 130:235.0 131:2172.0 132:1576.0 133:343.0 143:171.0 144:20.0 145:577.0 146:129.0 149:75.0 150:22.0 157:39.0 159:78.0 171:92.0 172:28.0 187:106.0 201:79.0 215:2429.0 216:383.0 217:112.0 221:143.0 222:38.0 252:13.0 25…	C01601	8158	FBUKVWPVBMHYJY-UHFFFAOYSA-N	17619	24918	19657	17455	17047	19807	22025	18975	15672	24405	19140	15738	22894	21616	18474	14031	24721	17261	14417	19791	16102	17291	19454	15803	22936	20705	19831	22818	16802	21822	16131	18907	23610	17758	24116	16326	20940	18407	20550	18374
pantothenic acid	690887	291	31356	86:142.0 87:115.0 88:61.0 89:123.0 91:147.0 93:29.0 97:25.0 98:459.0 100:211.0 101:202.0 102:407.0 103:6738.0 104:460.0 105:272.0 106:32.0 114:19.0 115:305.0 116:236.0 117:4122.0 118:351.0 119:205.0 120:33.0 121:29.0 122:19.0 124:194.0 128:128.0 129:1113.0 130:360.0 131:394.0 132:39.0 133:428.0 134:46.0 135:88.0 143:489.0 144:621.0 145:402.0 146:236.0 147:1702.0 148:191.0 149:222.0 156:34.0 157:2…	C12276	6613	GHOKWGTUZJEAQD-ZETCQYMHSA-N	170	265	337	237	307	315	561	351	341	442	375	527	473	372	467	351	464	654	497	746	217	231	340	347	178	272	458	493	443	573	389	411	522	558	357	506	708	424	721	508
palmitic acid	713809	313	11	85:5547.0 86:2174.0 87:1945.0 88:1374.0 89:4967.0 90:773.0 91:1518.0 92:318.0 93:3798.0 94:511.0 95:10592.0 96:1486.0 97:8747.0 98:6953.0 99:4528.0 100:714.0 101:2700.0 102:872.0 103:543.0 105:5528.0 106:406.0 107:1555.0 108:180.0 109:2908.0 110:516.0 111:3724.0 112:1696.0 113:834.0 114:115.0 115:1629.0 116:11477.0 117:187825.0 118:18078.0 119:7322.0 120:225.0 121:1203.0 122:69.0 123:876.0 124:28…	C00249	985	IPCSVZSSVZVIGE-UHFFFAOYSA-N	8367	5938	6716	7231	5413	6207	5528	5208	6980	5909	6913	5555	5706	447	5763	5304	6344	7118	6607	6594	6027	6079	5545	5981	6119	6384	5942	7288	5052	6185	7167	5984	7068	7796	6264	7376	6012	6158	3208	6851
oxoproline	485935	156	10	85:3305.0 86:3646.0 88:224.0 89:349.0 92:90.0 93:31.0 94:268.0 97:300.0 98:1005.0 99:1224.0 100:2213.0 101:88.0 102:773.0 103:769.0 104:198.0 105:507.0 106:72.0 108:279.0 109:95.0 110:674.0 111:220.0 112:3321.0 113:1081.0 114:1752.0 115:792.0 116:101.0 117:1281.0 118:207.0 119:332.0 122:383.0 123:65.0 124:48.0 126:536.0 127:49.0 128:356.0 129:115.0 130:114.0 131:2158.0 132:618.0 133:4526.0 134:75…	C01879	7405	ODHCTXKNWHHXJC-VKHMYHEASA-N	47423	159368	162630	67701	134343	72251	221991	167052	89542	105354	159445	142807	237358	249111	184049	49623	225402	134349	100981	225599	92229	89832	192586	166049	169098	124556	157336	182279	94129	187751	116851	132837	247498	154942	188273	203271	280848	68623	250212	248846
oxalic acid	260513	190	4923	85:642.0 86:564.0 88:852.0 89:2725.0 90:394.0 91:354.0 92:72.0 93:452.0 95:374.0 99:782.0 100:169.0 101:3135.0 102:7162.0 103:10813.0 104:1629.0 105:3087.0 106:416.0 107:839.0 108:169.0 109:471.0 110:173.0 111:137.0 113:787.0 114:94.0 115:3681.0 116:1325.0 117:6042.0 118:1002.0 119:1067.0 120:91.0 121:33.0 122:65.0 123:314.0 124:97.0 125:300.0 129:68.0 130:184.0 131:11895.0 132:2017.0 133:14362.0…	C00209	971	MUBZPKHOEPUJKR-UHFFFAOYSA-N	200900	198462	407822	248100	419904	353956	427383	510787	373240	429531	514563	563223	412869	543029	497108	142421	455859	634907	315915	506684	321910	428428	485246	424960	383508	429287	322874	448805	436807	493310	468597	464309	678860	616311	508183	599734	631261	461616	475684	365574
orotic acid	586317	254	18492	86:145.0 93:50.0 97:74.0 99:33.0 100:658.0 101:27.0 117:39.0 124:23.0 131:210.0 132:36.0 133:51.0 140:16.0 147:494.0 153:16.0 158:39.0 167:49.0 174:219.0 214:30.0 225:13.0 226:22.0 239:84.0 246:15.0 253:160.0 254:1313.0 255:366.0 256:147.0 257:19.0 269:169.0 270:80.0 271:22.0 282:29.0 298:15.0 313:14.0 328:15.0 336:13.0 356:52.0 357:395.0 358:187.0 359:82.0 360:19.0 371:27.0 372:28.0 397:15.0 400…	C00295	967	PXQPEWDEAKTCGB-UHFFFAOYSA-N	692	934	1138	482	658	299	353	408	271	273	1137	1720	1568	1736	498	444	597	527	519	830	1062	876	1112	1333	787	221	453	720	393	465	2128	1412	3314	1010	1710	1049	748	578	750	689
ornithine	618628	142	139461	85:291.0 86:2801.0 87:436.0 88:656.0 90:128.0 93:125.0 94:42.0 98:332.0 100:2467.0 101:931.0 102:1135.0 103:5765.0 104:535.0 105:307.0 106:58.0 108:37.0 109:61.0 110:133.0 112:404.0 113:211.0 114:743.0 115:513.0 116:1682.0 117:1042.0 118:213.0 119:246.0 120:53.0 121:68.0 123:24.0 124:91.0 126:406.0 128:926.0 130:1331.0 131:786.0 132:609.0 133:1014.0 134:266.0 135:208.0 136:67.0 140:210.0 141:248.…	C00077	88747248	AHLPHDHHMVZTML-BYPYZUCNSA-N	1304	2904	2102	1851	1853	674	2100	1613	1444	1578	2905	3520	3200	3208	2116	1522	2186	2947	3313	3990	1196	1955	2042	2542	3156	1716	1957	2907	808	1996	3092	1834	3321	3581	2210	3023	3565	987	5791	4038
oleic acid	779120	339	43	85:2268.0 86:703.0 87:608.0 88:472.0 89:1302.0 90:134.0 91:1987.0 92:342.0 93:2662.0 94:1268.0 95:7406.0 96:10672.0 97:6738.0 98:7712.0 99:1578.0 100:201.0 101:682.0 102:145.0 103:388.0 104:124.0 105:1450.0 106:261.0 107:1323.0 108:726.0 109:3302.0 110:3665.0 111:2689.0 112:1153.0 113:264.0 114:114.0 115:259.0 116:3180.0 117:34280.0 118:3347.0 119:2670.0 120:259.0 121:1238.0 122:553.0 123:2546.0 …	C00712	445639	ZQPPMHVWECSIRJ-KTKRTIGZSA-N	161	156	242	130	188	100	323	145	166	193	206	34	293	237	149	325	89	192	378	254	232	184	158	126	223	215	141	164	70	201	271	161	118	322	187	362	105	137	215	230
octadecanol	755409	327	997	85:3812.0 86:224.0 87:853.0 88:401.0 89:7207.0 90:593.0 91:2611.0 92:281.0 93:206.0 94:57.0 95:784.0 96:291.0 97:9121.0 98:859.0 99:2097.0 100:378.0 101:3627.0 102:510.0 103:8469.0 104:862.0 105:36.0 109:308.0 110:74.0 111:3878.0 112:352.0 113:980.0 115:1693.0 116:209.0 121:32.0 123:60.0 124:45.0 125:1173.0 126:164.0 127:120.0 129:1075.0 137:28.0 139:257.0 140:47.0 141:118.0 143:377.0 144:41.0 14…		8221	GLDOVTGHNKAZLK-UHFFFAOYSA-N	461	602	382	517	747	441	650	523	551	431	524	539	442	438	469	440	822	431	409	389	471	423	603	316	437	351	457	528	359	515	107	649	504	507	506	351	510	438	384	796
O-acetylserine	414914	174	3943	85:50.0 88:106.0 89:497.0 90:71.0 91:67.0 92:42.0 93:18.0 95:6.0 100:1115.0 101:583.0 102:369.0 103:258.0 104:89.0 107:294.0 108:42.0 110:29.0 111:25.0 112:39.0 114:153.0 115:82.0 116:2248.0 117:605.0 118:166.0 127:20.0 128:35.0 129:92.0 130:222.0 131:1052.0 132:2219.0 133:371.0 134:647.0 136:37.0 143:114.0 144:320.0 146:17.0 147:692.0 149:416.0 153:1.0 158:108.0 160:21.0 167:25.0 172:25.0 174:33…	C00979	99478	VZXPDPZARILFQX-BYPYZUCNSA-N	1428	2319	1661	1123	1874	417	2261	173	1528	1282	378	1308	1338	690	1058	531	878	512	974	1415	617	1531	1395	899	741	2802	518	578	615	1794	683	2038	1777	343	637	855	723	497	723	1219
nicotinamide	471602	179	84542	86:209.0 89:162.0 90:198.0 92:127.0 93:263.0 94:195.0 100:836.0 102:136.0 103:220.0 104:2595.0 105:4174.0 106:810.0 108:61.0 119:174.0 120:170.0 122:157.0 123:39.0 135:126.0 136:6136.0 137:808.0 138:240.0 139:45.0 148:164.0 150:54.0 151:55.0 161:87.0 163:218.0 164:32.0 165:80.0 166:33.0 175:86.0 178:33.0 179:15388.0 180:2109.0 181:675.0 182:48.0 193:1190.0 194:529.0 195:117.0	C00153	936	DFPAKSUCGFBDDF-UHFFFAOYSA-N	432	564	554	410	462	425	971	859	466	695	774	479	620	590	629	484	400	547	992	1026	651	631	583	826	777	528	888	841	630	875	865	642	849	858	778	1217	1187	679	1077	882
nicotianamine	898928	186	4701	85:1045.0 86:2209.0 87:492.0 88:565.0 89:531.0 90:17.0 91:24.0 92:91.0 93:60.0 94:2698.0 95:943.0 96:3824.0 97:768.0 98:953.0 99:875.0 100:6932.0 101:1241.0 102:2847.0 103:7119.0 104:1527.0 105:301.0 106:281.0 107:1.0 108:595.0 109:248.0 110:374.0 111:147.0 112:876.0 113:681.0 114:3367.0 115:1337.0 116:3362.0 117:2278.0 118:457.0 119:120.0 120:106.0 121:331.0 122:538.0 123:901.0 124:543.0 125:476…	C05324	9882882	KRGPXXHMOXVMMM-CIUDSAMLSA-N	424	339	343	501	297	278	515	392	86	888	286	460	459	239	97	552	126	1197	1467	1582	463	405	280	779	869	354	1023	1343	519	1271	658	126	160	856	145	1326	980	631	1909	1130
N-acetylmannosamine	735323	319	3244	85:1141.0 86:451.0 87:885.0 88:794.0 89:7966.0 90:778.0 91:624.0 93:87.0 94:49.0 95:261.0 96:255.0 97:763.0 98:285.0 99:645.0 100:1414.0 101:2282.0 102:588.0 103:22851.0 104:2059.0 105:1722.0 106:141.0 108:12.0 109:340.0 110:235.0 111:311.0 113:842.0 114:5548.0 115:953.0 116:1164.0 117:12085.0 118:1540.0 119:1530.0 120:118.0 123:92.0 125:29.0 126:101.0 127:736.0 128:479.0 129:16363.0 130:2769.0 1…	C00645	439281	OVRNDRQMDRJTHS-ZTVVOAFPSA-N	3330	6254	8752	5621	6261	3738	15223	12282	5147	9249	10888	12485	13055	10138	8477	3001	9473	14197	2651	10964	6393	6667	9394	13699	12328	6326	11873	15610	7454	13218	8138	9299	10513	12219	12304	10450	13013	5715	14341	10341
n-acetyl-d-hexosamine	746341	319	1674	85:448.0 86:230.0 88:655.0 89:9641.0 90:778.0 99:345.0 100:2544.0 101:2131.0 102:964.0 103:45456.0 104:4561.0 105:1970.0 106:10.0 113:655.0 114:2492.0 115:766.0 116:104.0 117:11596.0 118:1129.0 119:1434.0 126:279.0 127:100.0 128:346.0 129:15183.0 130:2624.0 131:3200.0 133:18066.0 134:1988.0 135:689.0 140:72.0 141:221.0 142:588.0 143:1887.0 144:357.0 146:152.0 147:49213.0 148:7660.0 149:5097.0 150…	C03878	24139	OVRNDRQMDRJTHS-FMDGEEDCSA-N	466	1795	1557	750	1080	623	6714	2429	1025	1923	2716	3513	3872	2301	2001	1179	1402	2477	2977	2077	1215	1429	980	2775	1996	1503	2787	2633	1601	3615	2249	1627	2785	3169	2028	1583	2938	748	6114	3925
myristic acid	634414	285	127	85:1672.0 86:922.0 87:259.0 88:617.0 89:2301.0 90:194.0 91:565.0 93:1089.0 94:262.0 95:2947.0 96:479.0 97:1977.0 98:1752.0 99:1650.0 100:382.0 101:1406.0 104:452.0 105:1305.0 106:321.0 107:394.0 108:204.0 109:725.0 110:354.0 111:699.0 112:710.0 116:3547.0 117:55137.0 118:5160.0 119:1775.0 120:155.0 121:314.0 122:68.0 123:74.0 124:132.0 125:204.0 128:186.0 129:23236.0 130:2963.0 131:10163.0 132:11…	C06424	11005	TUNFSRHWOTWDNC-UHFFFAOYSA-N	304	396	410	504	277	405	414	454	360	389	488	391	278	395	213	405	493	415	468	403	354	337	159	377	234	279	362	567	483	287	155	383	528	731	431	406	544	265	340	377
myo-inositol	730022	305	1741	85:113.0 86:491.0 87:31.0 88:19.0 89:298.0 90:43.0 95:6.0 99:170.0 100:411.0 101:320.0 102:164.0 103:3399.0 104:366.0 105:2.0 107:22.0 108:49.0 109:262.0 111:243.0 112:149.0 113:176.0 114:90.0 115:187.0 116:296.0 117:1042.0 118:228.0 119:212.0 121:1.0 123:6.0 124:38.0 125:22.0 126:73.0 127:67.0 128:163.0 129:4240.0 130:611.0 131:1566.0 132:262.0 133:3203.0 134:572.0 135:421.0 136:43.0 138:92.0 13…	C00137	892	CDAISMWEOUEBRE-UHFFFAOYSA-N	8472	19198	22557	12879	13384	8504	28645	22130	10365	20472	22291	21786	30927	21942	18107	11099	16769	22828	18853	28818	14925	13266	19057	26540	27745	13177	22604	25007	14519	19240	18781	20251	21372	25854	22468	20105	27225	13510	33169	25338
mucic acid	709842	333	6426	85:27.0 88:2.0 89:28.0 90:101.0 93:21.0 95:66.0 99:171.0 101:153.0 102:448.0 103:1679.0 104:125.0 105:13.0 106:2.0 107:23.0 110:36.0 111:100.0 115:17.0 117:651.0 118:112.0 121:8.0 124:1.0 128:77.0 129:1082.0 130:312.0 131:424.0 133:1205.0 134:12.0 135:82.0 136:4.0 137:3.0 139:2.0 140:41.0 141:17.0 142:106.0 143:1480.0 144:111.0 145:32.0 146:17.0 147:6387.0 148:679.0 149:640.0 150:1.0 152:3.0 153:…	C00879	3037582	DSLZVSRJTYRBFB-DUHBMQHGSA-N	588	950	1027	713	861	350	1293	1187	610	1100	616	1303	1304	868	932	212	1133	1629	1225	1694	962	821	1097	1358	1257	728	1015	1408	822	1406	1245	396	1413	1312	1350	1479	1738	824	1388	1168
methyl O-D-galactopyranoside	630836	204	14758	85:74.0 86:12.0 87:134.0 88:68.0 89:1655.0 90:104.0 91:27.0 95:3.0 96:6.0 97:2.0 98:9.0 99:77.0 100:29.0 101:396.0 102:59.0 103:3447.0 104:316.0 105:190.0 106:20.0 109:22.0 110:4.0 111:63.0 112:10.0 113:65.0 114:78.0 115:69.0 116:268.0 117:709.0 118:65.0 119:148.0 121:10.0 125:7.0 126:38.0 127:54.0 128:13.0 129:1102.0 130:73.0 131:445.0 132:68.0 133:2743.0 134:271.0 135:128.0 136:16.0 138:1.0 139…	C03619	94214	HOVAGTYPODGVJG-VOQCIKJUSA-N	435	459	357	179	369	75	689	387	126	341	278	366	566	330	225	2492	347	775	3324	493	312	431	593	669	667	631	349	388	304	313	313	299	197	395	691	937	1017	282	1955	2518
methionine sulfoxide	605401	128	1689	85:190.0 86:166.0 87:115.0 88:218.0 89:228.0 90:246.0 91:507.0 93:268.0 95:100.0 96:21.0 97:18.0 98:97.0 99:117.0 100:2102.0 101:139.0 102:866.0 103:1736.0 104:167.0 107:262.0 109:20.0 112:159.0 113:5.0 114:774.0 115:220.0 116:152.0 117:80.0 118:107.0 119:358.0 120:67.0 121:90.0 123:130.0 124:16.0 125:4.0 128:17068.0 129:2443.0 130:1288.0 131:524.0 132:237.0 133:525.0 134:149.0 135:137.0 136:133.…	C02989	158980	QEFRNWWLZKMPFJ-YGVKFDHGSA-N	630	968	995	918	966	799	1738	1943	743	1187	1273	1991	2052	1760	1518	788	1489	1095	1653	2253	994	1355	1389	1946	1595	1130	1566	1831	1141	1916	1241	1369	1806	1749	1586	2079	1997	1052	3503	2168
methionine	483560	176	45	86:209.0 87:157.0 88:89.0 92:28.0 96:49.0 98:179.0 100:943.0 101:113.0 102:175.0 103:199.0 104:109.0 105:441.0 107:31.0 114:409.0 115:107.0 117:136.0 118:21.0 122:14.0 128:6524.0 129:603.0 130:496.0 131:1184.0 132:354.0 134:118.0 144:59.0 145:49.0 146:97.0 147:486.0 148:243.0 149:200.0 151:51.0 159:53.0 160:202.0 161:47.0 162:43.0 163:30.0 164:16.0 172:30.0 174:90.0 175:14.0 176:5168.0 177:722.0 …	C00073	6137	FFEARJCKVFRZRR-BYPYZUCNSA-N	415	573	542	566	311	709	697	1077	562	761	1330	1085	1145	312	478	417	1289	1393	1030	1652	383	308	408	483	466	667	189	1116	308	1709	356	277	1955	1317	2335	731	1186	612	1645	1021
methanolphosphate	289520	241	5393	91:189.0 98:118.0 99:213.0 109:13.0 110:42.0 115:116.0 117:125.0 118:94.0 119:81.0 121:107.0 122:6.0 123:105.0 130:13.0 133:646.0 134:53.0 135:408.0 136:125.0 137:176.0 143:34.0 144:4.0 151:78.0 158:18.0 160:2.0 163:856.0 164:67.0 165:58.0 167:92.0 168:16.0 181:147.0 184:128.0 195:233.0 198:4.0 210:1.0 211:438.0 212:72.0 213:19.0 225:3.0 228:46.0 239:1.0 241:2338.0 242:433.0 243:249.0 244:9.0 256…		13130	CAAULPUQFIIOTL-UHFFFAOYSA-N	5965	14650	8287	10216	16154	8160	34075	24103	8659	21967	17336	19743	26548	21179	16693	14255	14265	26326	16719	17768	20347	15037	29188	37373	33975	13239	16127	27494	14342	19480	15934	16497	32573	32049	20535	20420	30603	13859	21011	19562
mannonic acid NIST	689527	333	84667	85:362.0 87:509.0 88:148.0 89:1741.0 90:24.0 95:54.0 97:303.0 99:268.0 100:2.0 101:1388.0 102:1982.0 103:9955.0 104:1044.0 105:492.0 107:4.0 109:11.0 110:32.0 111:166.0 113:287.0 114:15.0 115:403.0 116:499.0 117:7048.0 118:652.0 119:665.0 126:13.0 127:153.0 128:31.0 129:5830.0 130:1573.0 131:2999.0 132:332.0 133:5505.0 134:683.0 135:410.0 138:6.0 139:2.0 141:167.0 142:35.0 143:3605.0 144:325.0 14…	C00514	3246006	RGHNJXZEOKUKBD-MBMOQRBOSA-N	227	144	417	256	329	203	514	507	342	359	665	654	571	287	391	304	408	552	585	479	286	249	236	268	299	230	368	148	281	447	562	400	729	710	514	810	711	369	352	508
maltose	946601	204	1979	85:18.0 86:40.0 87:38.0 89:640.0 90:50.0 94:3.0 95:51.0 96:226.0 97:52.0 98:60.0 99:10.0 100:262.0 101:31.0 102:157.0 103:2571.0 104:171.0 105:231.0 108:7.0 109:86.0 111:17.0 112:13.0 113:130.0 114:62.0 116:82.0 117:1560.0 118:98.0 119:98.0 125:5.0 127:10.0 128:39.0 129:1849.0 130:331.0 131:223.0 132:24.0 133:813.0 134:81.0 140:25.0 141:77.0 142:107.0 143:428.0 145:58.0 147:3256.0 148:427.0 149:3…	C00208	439186	GUBGYTABKSRVRQ-PICCSMPSSA-N	549	4343	1043	2278	909	454	978	1377	471	1626	1031	1529	1028	3589	1234	3593	1063	1258	5416	1894	908	754	1472	1493	6636	1339	1110	1715	927	2731	1840	1180	2440	581	2166	946	1907	585	14522	5486
malonic acid	305372	233	16918	85:1026.0 86:1326.0 87:4220.0 88:2045.0 89:1145.0 90:185.0 91:256.0 93:120.0 94:177.0 95:78.0 96:135.0 97:304.0 98:370.0 99:12693.0 100:1810.0 101:5145.0 102:1329.0 103:2418.0 104:448.0 105:1540.0 107:59.0 108:167.0 109:3011.0 110:122.0 111:448.0 113:89.0 114:57.0 115:3728.0 116:2072.0 117:4257.0 118:696.0 119:863.0 120:61.0 122:131.0 124:104.0 126:90.0 127:206.0 130:370.0 131:7673.0 132:1197.0 1…	C00383	867	OFOBLEOULBTSOW-UHFFFAOYSA-N	111	170	135	142	173	137	175	93	103	154	143	287	109	61	148	121	132	131	251	257	133	145	120	155	169	183	176	255	215	287	143	151	188	270	145	186	181	172	63	151
malic acid	463180	233	1391	85:66.0 87:316.0 88:106.0 89:148.0 90:42.0 95:37.0 99:129.0 101:4462.0 102:488.0 103:641.0 104:93.0 105:294.0 115:533.0 116:432.0 117:2305.0 118:259.0 119:501.0 120:70.0 121:62.0 124:21.0 129:385.0 131:1945.0 132:129.0 133:6850.0 134:1075.0 135:667.0 136:51.0 137:33.0 139:20.0 142:41.0 143:745.0 144:107.0 145:145.0 147:21089.0 148:2969.0 149:2528.0 150:99.0 151:286.0 153:24.0 158:12.0 159:29.0 16…	C00711	525	BJEPYKJPYRNKOW-UHFFFAOYSA-N	47717	92047	127361	69024	99083	59303	165173	166977	76210	103940	201212	229763	226392	208912	133832	74649	180551	151926	190198	269872	73784	95154	129632	165491	140465	90938	197881	182783	115137	200814	144771	167575	228700	231372	135157	228096	254492	87028	378852	218546
maleic acid	363611	245	14714	85:300.0 86:27.0 87:53.0 88:3.0 89:7.0 90:9.0 92:15.0 93:51.0 97:3.0 98:245.0 99:110.0 100:25.0 101:8.0 102:26.0 103:103.0 104:2.0 105:20.0 106:28.0 107:81.0 108:16.0 110:4.0 111:2.0 113:162.0 114:6.0 115:612.0 116:5.0 117:167.0 118:22.0 119:32.0 120:3.0 123:2.0 126:363.0 127:156.0 128:46.0 129:24.0 130:87.0 131:191.0 133:608.0 134:197.0 135:49.0 136:9.0 137:1.0 138:1.0 143:343.0 144:5.0 145:15.0…	C01384	444266	VZCYOOQTPOCHFL-UPHRSURJSA-N	784	1303	425	859	1018	1216	2455	2571	436	1302	1380	496	1906	967	189	753	132	799	2867	1664	1221	1053	728	1707	2085	1123	1956	2523	1079	2758	515	526	1923	1487	1081	1238	1515	362	2090	1863
lyxose	541086	217	85112	85:155.0 87:455.0 88:330.0 89:5647.0 90:390.0 94:48.0 96:79.0 99:377.0 100:2717.0 101:1492.0 102:600.0 103:35832.0 104:3052.0 105:1929.0 106:120.0 107:53.0 109:17.0 110:80.0 111:85.0 112:138.0 113:332.0 114:254.0 115:274.0 116:415.0 117:4160.0 118:270.0 119:534.0 121:96.0 126:187.0 127:203.0 128:129.0 129:3451.0 130:540.0 131:1760.0 133:4326.0 134:544.0 135:414.0 138:29.0 139:23.0 142:121.0 143:6…	C00476	439240	SRBFZHDQGSBBOR-AGQMPKSLSA-N	1374	1933	2793	1664	1823	1771	7415	5934	2614	4741	943	4916	1231	3553	1517	1403	4882	2005	3646	6336	480	2147	2924	3764	708	2917	885	7734	3319	5700	1024	2505	985	3960	859	1119	994	2734	2315	1899
lyxitol	573587	217	233	85:649.0 86:59.0 87:142.0 88:75.0 89:607.0 95:25.0 97:25.0 99:247.0 100:57.0 101:550.0 102:92.0 103:6136.0 104:480.0 105:198.0 106:44.0 111:98.0 112:73.0 113:193.0 114:48.0 115:140.0 116:225.0 117:3144.0 118:289.0 119:258.0 120:15.0 127:102.0 129:2235.0 130:260.0 131:777.0 133:1341.0 134:87.0 135:42.0 141:89.0 143:195.0 144:16.0 145:61.0 147:6082.0 148:964.0 149:538.0 150:39.0 151:43.0 157:231.0 …	C00532	439255	HEBKCHPVOIAQTA-IMJSIDKUSA-N	3902	11262	13763	8832	9044	5141	20330	16322	6388	14010	1724	15357	17903	14679	11256	5764	12010	13396	10448	16527	9329	9151	11701	17726	21452	10148	14252	16108	9527	17202	86	12341	2013	18131	12246	1358	16387	8040	23056	16362
lysine	663483	156	12	85:2755.0 86:29130.0 87:3786.0 88:12077.0 89:1291.0 90:709.0 92:136.0 93:103.0 94:668.0 95:313.0 96:506.0 97:609.0 98:2819.0 99:1955.0 100:31497.0 101:4429.0 102:7671.0 103:3645.0 104:565.0 105:379.0 106:83.0 107:97.0 108:128.0 109:134.0 110:753.0 111:416.0 112:6522.0 113:2018.0 114:7116.0 115:10574.0 116:3465.0 117:4929.0 118:1028.0 119:900.0 120:191.0 121:127.0 123:145.0 124:606.0 125:212.0 126…	C00047	5962	KDXKERNSBIXSRK-YFKPBYRVSA-N	1463	3464	2798	2250	2459	503	3420	2843	1295	1256	4106	4823	4778	3370	1628	1096	2946	2722	1854	5386	1444	2696	2861	3974	3308	2404	2517	3534	944	3624	3202	2714	4063	1479	3026	4164	5016	1228	8166	4680
linolenic acid	780376	108	4704	85:8263.0 86:3076.0 87:2638.0 88:1997.0 89:7764.0 90:1581.0 91:88210.0 92:18165.0 93:106470.0 94:49681.0 95:90232.0 96:13310.0 97:12053.0 98:4717.0 99:6412.0 100:1262.0 101:3274.0 102:1160.0 103:5418.0 104:2581.0 105:34033.0 106:9798.0 107:47500.0 108:55116.0 109:22200.0 110:3750.0 111:4531.0 112:1209.0 113:1357.0 114:277.0 115:3868.0 116:10630.0 117:51242.0 118:6917.0 119:21073.0 120:8375.0 121:…	C06427	5280934	DTOSIQBPPRVQHS-PDBXOOCHSA-N	780	817	649	412	378	285	472	591	241	690	667	924	1599	276	622	3943	733	759	4112	211	348	632	468	195	640	555	163	593	708	469	1601	150	444	765	583	2003	1144	596	1775	2322
linoleic acid	777414	150	165	85:1534.0 86:470.0 87:386.0 88:244.0 89:1256.0 90:176.0 91:6885.0 92:1525.0 93:8654.0 94:6153.0 95:14372.0 96:7918.0 97:3896.0 98:518.0 99:829.0 100:115.0 101:441.0 102:166.0 103:421.0 104:436.0 105:2615.0 106:995.0 107:4482.0 108:3591.0 109:5935.0 110:3865.0 111:1556.0 112:178.0 113:194.0 115:385.0 116:1903.0 117:9875.0 118:1041.0 119:1844.0 120:836.0 121:4850.0 122:2280.0 123:2389.0 124:1664.0 …	C01595	5280450	OYHQOLUKZRVURQ-HZJYTTRNSA-N	283	216	132	211	244	271	665	225	215	259	87	379	251	268	217	509	132	240	668	76	275	280	224	182	163	233	202	356	291	196	375	288	249	337	254	521	289	409	213	413
lignoceric acid	978597	132	104210	85:2380.0 86:760.0 89:854.0 91:551.0 92:193.0 93:904.0 94:146.0 95:3048.0 96:974.0 97:3155.0 98:2298.0 99:1510.0 102:139.0 105:433.0 107:88.0 109:1019.0 111:1448.0 112:385.0 113:495.0 116:1737.0 117:37070.0 118:3596.0 119:1601.0 120:87.0 121:738.0 123:159.0 125:482.0 129:17441.0 130:2113.0 131:3037.0 132:17484.0 133:6436.0 134:1239.0 135:1008.0 143:1648.0 145:11762.0 146:1599.0 153:158.0 154:47.0…	C08320	11197	QZZGJDVWLFXDLK-UHFFFAOYSA-N	206	307	274	338	270	454	283	404	400	382	247	385	313	319	263	444	679	511	481	442	281	488	562	246	338	429	436	491	370	410	307	621	280	429	296	422	318	411	363	399
levoglucosan	569637	204	3169	85:775.0 87:165.0 88:163.0 89:177.0 90:42.0 91:21.0 92:2.0 95:13.0 97:132.0 98:53.0 99:731.0 100:180.0 101:2830.0 102:212.0 103:5456.0 104:270.0 105:366.0 109:317.0 111:424.0 112:33.0 113:818.0 114:131.0 115:724.0 116:1575.0 117:3643.0 118:337.0 119:568.0 120:38.0 125:69.0 126:44.0 127:263.0 129:5991.0 130:703.0 131:1830.0 132:221.0 133:3867.0 134:297.0 135:293.0 136:48.0 139:2.0 140:20.0 141:67.…		2724705	TWNIBLMWSKIRAT-VFUOTHLCSA-N	526	333	726	592	806	899	304	915	378	1044	917	835	222	459	466	1240	830	468	628	383	653	185	243	178	766	293	973	295	504	763	506	484	911	190	2911	464	580	761	1812	2001
leucine	345168	158	84921	85:4255.0 86:3321.0 87:4862.0 88:1815.0 89:5808.0 90:737.0 91:3465.0 92:1219.0 93:1050.0 94:206.0 95:597.0 96:1025.0 97:645.0 98:1470.0 99:1893.0 100:8521.0 101:2533.0 102:17396.0 103:18799.0 104:3755.0 105:8482.0 106:1272.0 107:5468.0 108:712.0 109:1678.0 110:679.0 111:174.0 112:443.0 113:769.0 114:594.0 115:14996.0 116:5260.0 117:7520.0 118:1448.0 119:9608.0 120:1063.0 121:6360.0 122:565.0 123:…	C00123	6106	ROHFNLRQFUQHCH-YFKPBYRVSA-N	6409	12566	12397	12447	8394	5986	19168	18108	5926	18552	10973	30705	8892	9655	8939	8220	18632	5660	11186	19034	12246	13873	14705	15891	28293	21545	16770	23699	7071	31259	9774	8695	18712	30288	15022	14452	16752	10059	51556	39024
lauric acid	547906	117	49	85:168.0 86:141.0 87:101.0 89:291.0 93:60.0 95:377.0 96:145.0 97:251.0 98:244.0 101:191.0 104:48.0 105:176.0 109:155.0 111:88.0 115:37.0 116:428.0 117:7512.0 118:665.0 119:226.0 120:42.0 122:42.0 129:2879.0 130:369.0 131:1222.0 132:1823.0 133:146.0 134:55.0 139:64.0 143:180.0 145:762.0 146:42.0 147:217.0 153:16.0 154:30.0 157:84.0 160:63.0 169:49.0 171:95.0 176:32.0 179:30.0 185:98.0 186:22.0 187…	C02679	3893	POULHZVOKOAJMA-UHFFFAOYSA-N	4532	7997	2065	3165	2990	6512	7104	6134	3075	6517	3245	2521	7827	6833	2981	2333	4370	6699	1557	5006	4189	3096	8395	2933	2836	4544	3574	5008	4231	1246	1888	2708	3769	3185	4810	3214	3993	4385	1742	2694
lactulose	929908	204	6432	85:15.0 86:83.0 89:320.0 93:71.0 96:35.0 99:179.0 100:35.0 101:517.0 103:2907.0 104:50.0 105:154.0 109:103.0 113:221.0 114:90.0 115:12.0 116:235.0 117:787.0 118:124.0 124:47.0 126:14.0 129:3378.0 130:406.0 131:445.0 133:426.0 134:88.0 136:23.0 137:31.0 139:22.0 141:191.0 143:655.0 144:48.0 145:261.0 147:4074.0 148:387.0 149:168.0 150:56.0 153:61.0 155:144.0 156:88.0 157:219.0 158:34.0 159:34.0 16…	C07064	11333	JCQLYHFGKNRPGE-FCVZTGTOSA-N	913	1275	865	635	724	692	964	1388	861	1068	789	886	1736	686	883	1475	976	1478	2093	1241	1201	930	1241	1365	1078	896	1019	7786	732	1221	1649	1123	1128	1497	902	1032	1158	873	1290	1973
lactic acid	219848	191	46123	86:16619.0 87:146789.0 88:203478.0 89:44021.0 90:4589.0 91:5399.0 92:2326.0 93:2115.0 94:10118.0 95:3417.0 96:954.0 97:589.0 99:12540.0 100:2928.0 101:119286.0 102:104206.0 103:90957.0 104:16144.0 105:36142.0 106:5020.0 107:5840.0 108:885.0 109:791.0 110:2194.0 113:11122.0 114:2567.0 115:74843.0 116:33695.0 117:2428105.0 118:268597.0 119:128879.0 120:10300.0 121:3135.0 122:950.0 123:1352.0 124:11…	C01432	612	JVTAAEKCZFNVCJ-UHFFFAOYSA-N	5080	2309	7807	5277	7838	1882	5423	1882	4446	3236	10159	9461	9923	7960	3653	4343	8180	12459	7158	7979	4955	5894	5265	5161	8681	3695	4040	5144	6782	7082	6414	7040	5027	14621	13283	6001	8590	5440	9269	5789
isothreonic acid	489385	292	1679	85:304.0 86:391.0 88:631.0 89:4158.0 90:414.0 91:179.0 92:233.0 93:215.0 94:45.0 96:145.0 97:116.0 98:15.0 99:816.0 100:110.0 101:2762.0 102:21122.0 103:20966.0 104:2634.0 105:1408.0 106:64.0 107:560.0 108:290.0 109:71.0 110:395.0 111:105.0 113:1032.0 114:253.0 115:1508.0 116:877.0 117:33848.0 118:3267.0 119:2907.0 120:140.0 121:96.0 122:8.0 124:18.0 125:13.0 127:531.0 128:50.0 129:6995.0 130:178…	C00639	151152	JPIJQSOTBSSVTP-GBXIJSLDSA-N	355	774	859	639	616	553	946	1317	425	1110	1254	1249	1547	1270	893	676	1075	1084	856	1903	681	593	885	1116	1297	817	1138	1213	745	1322	824	1047	921	1108	961	1568	1659	855	2498	1320
isothreitol	464779	217	16903	85:742.0 86:140.0 87:615.0 88:393.0 89:1536.0 90:159.0 91:2061.0 92:288.0 93:1389.0 94:90.0 95:329.0 96:65.0 97:192.0 98:37.0 99:424.0 100:313.0 101:4405.0 102:291.0 103:12246.0 104:1246.0 105:918.0 106:208.0 107:485.0 108:63.0 109:226.0 110:635.0 111:67.0 113:108.0 114:27.0 115:851.0 116:2489.0 117:8732.0 118:865.0 119:715.0 121:25.0 123:33.0 125:14.0 126:111.0 127:51.0 128:16.0 129:2214.0 130:6…	C16884	169019	UNXHWFMMPAWVPI-QWWZWVQMSA-N	644	1177	1145	926	1144	860	2369	2080	973	1826	54672	325	1882	1631	1718	642	75	2181	1753	2122	1006	1315	1441	2089	2196	1156	2188	2381	1116	2038	1216	1794	1762	1389	2103	60180	1710	844	2706	1987
isoribose	558730	217	3252	86:74.0 88:53.0 89:761.0 90:49.0 91:78.0 100:426.0 101:99.0 102:35.0 103:5979.0 104:531.0 105:61.0 107:214.0 110:94.0 112:54.0 114:269.0 117:635.0 120:4.0 128:67.0 129:439.0 131:214.0 133:253.0 140:14.0 142:67.0 143:208.0 144:147.0 145:66.0 146:137.0 147:1373.0 148:298.0 152:1.0 156:3.0 157:93.0 166:2.0 167:13.0 170:66.0 174:316.0 175:65.0 182:39.0 184:244.0 185:68.0 186:10.0 189:281.0 190:66.0 1…				378	264	714	356	285	131	668	457	457	195	740	800	563	891	533	333	512	520	525	571	316	320	684	747	642	451	632	1103	459	837	443	464	995	1096	647	887	761	183	872	562
isoleucine	359251	158	15	85:1549.0 86:3001.0 87:645.0 88:285.0 89:271.0 90:580.0 91:64.0 92:52.0 95:58.0 96:323.0 97:189.0 98:829.0 99:977.0 100:9875.0 101:1414.0 102:3456.0 103:1535.0 104:311.0 105:134.0 111:127.0 112:440.0 113:373.0 114:1505.0 115:765.0 116:651.0 118:274.0 119:292.0 121:53.0 123:27.0 126:183.0 128:1693.0 129:920.0 130:964.0 131:1559.0 132:2068.0 133:2024.0 135:106.0 142:989.0 143:511.0 144:398.0 145:30…	C00407	6306	AGPKZVBTJJNPAG-WHFBIAKZSA-N	13322	34587	34953	27854	32516	11802	54879	48392	12675	34451	43041	66260	45706	47381	27650	19073	34515	17717	28542	51999	25735	29038	37575	51699	66350	39616	32756	43531	24513	61137	28257	26412	49593	66562	31716	35511	58459	19726	90712	66431
isocitric acid	617338	245	32122	85:2447.0 86:626.0 87:1258.0 88:847.0 89:1234.0 90:260.0 91:1069.0 92:228.0 93:230.0 94:47.0 95:3308.0 97:857.0 98:490.0 99:1992.0 100:157.0 101:1347.0 102:1246.0 103:1778.0 104:706.0 105:2996.0 106:205.0 107:136.0 108:170.0 109:137.0 110:130.0 111:512.0 112:175.0 113:5118.0 114:643.0 115:1659.0 116:2844.0 117:4523.0 118:958.0 119:1389.0 120:194.0 121:151.0 122:61.0 123:48.0 124:33.0 125:32.0 126…	C00451	5318532	ODBLHEXUDAPZAU-ZAFYKAAXSA-N	574	622	868	595	1000	854	693	1590	1123	1164	1908	1491	1101	1129	1446	641	1291	1619	1165	2046	727	936	1084	617	1318	1109	1704	1736	1190	1739	1166	1633	1925	1690	1459	1418	1793	866	1733	717
hydroxylamine	253158	146	4211	85:497.0 86:2803.0 87:818.0 88:210.0 89:444.0 90:52.0 99:143.0 100:1769.0 101:310.0 102:90.0 103:289.0 113:392.0 114:359.0 115:278.0 116:400.0 117:769.0 118:165.0 119:4073.0 120:347.0 121:246.0 130:2689.0 131:1261.0 132:534.0 133:5379.0 134:778.0 135:325.0 140:17.0 144:46.0 145:193.0 146:4483.0 147:2330.0 148:211.0 160:124.0 161:218.0 171:38.0 172:25.0 177:32.0 178:25.0 187:27.0 188:34.0 204:99.0…	C00192	787	AVXURJPOCDRRFD-UHFFFAOYSA-N	31532	38276	42674	40382	38830	3483	34302	5609	32462	42191	42013	11274	42285	44241	35977	2497	37490	38606	7999	44228	3499	34279	40499	45512	44371	30589	50905	39246	4465	38850	31757	34499	40730	38377	44124	43212	52575	4957	47711	47470
homoserine	443878	218	2849	101:66.0 102:400.0 103:4169.0 104:311.0 105:88.0 108:5.0 113:20.0 114:56.0 115:64.0 116:6.0 117:924.0 118:50.0 125:1.0 128:3071.0 129:503.0 130:734.0 131:345.0 132:149.0 133:513.0 134:269.0 135:55.0 139:3.0 140:11.0 141:19.0 145:11.0 146:159.0 147:1347.0 148:40.0 149:294.0 157:459.0 158:17.0 159:17.0 172:20.0 177:38.0 180:8.0 184:17.0 185:46.0 191:9.0 199:4.0 200:1.0 202:287.0 204:73.0 208:3.0 21…	C00263	12647	UKAUYVFTDYCKQA-VKHMYHEASA-N	1221	3319	2672	2039	1059	1173	2422	2167	1185	3463	2068	2718	1596	1242	1970	910	3926	1867	3096	2801	2676	2821	2985	3330	4864	3309	3884	5119	1582	5164	2282	1819	2859	4448	4066	4368	2712	1624	9899	4199
histidine	664395	154	58170	132:965.0 153:2576.0 154:57570.0 155:11163.0 166:1042.0 167:250.0 226:659.0 238:1978.0 239:480.0 253:84.0 254:7954.0 255:1931.0 256:779.0 257:542.0 258:37.0 266:374.0 267:124.0 299:459.0 312:23.0 328:161.0 330:104.0 355:85.0 356:618.0 357:289.0 371:225.0 372:23.0 420:9.0 435:44.0 436:68.0	C00135	6274	HNDVDQJCIGZPNO-YFKPBYRVSA-N	754	438	539	975	464	767	2487	1925	299	1723	675	2310	899	277	605	1254	511	1912	3640	3541	875	753	433	1294	1572	597	1644	2526	856	3257	1182	359	513	1850	925	2358	1950	1076	3983	2343
hexuronic acid	667373	160	4554	85:209.0 86:138.0 88:682.0 89:1276.0 90:42.0 91:290.0 92:40.0 93:62.0 95:157.0 97:343.0 98:187.0 99:94.0 100:117.0 101:506.0 102:533.0 103:960.0 104:6.0 105:780.0 107:90.0 108:8.0 109:195.0 110:46.0 111:190.0 112:6.0 113:192.0 114:283.0 115:385.0 117:357.0 118:42.0 119:105.0 127:38.0 128:156.0 129:885.0 130:376.0 131:441.0 132:5.0 133:1378.0 134:249.0 135:228.0 137:19.0 141:7.0 142:42.0 143:2086.…		152867	IAJILQKETJEXLJ-UHFFFAOYSA-N	153	156	164	180	188	177	353	294	204	230	531	1324	201	197	296	99	775	1117	312	417	451	178	167	695	207	181	829	436	175	1077	478	300	835	766	264	424	1265	274	467	442
hexose	642640	319	20287	87:46.0 89:593.0 98:26.0 100:70.0 101:184.0 103:762.0 104:80.0 105:211.0 107:72.0 112:27.0 113:40.0 114:76.0 116:57.0 117:792.0 118:43.0 119:50.0 128:26.0 129:778.0 130:84.0 131:128.0 133:426.0 134:123.0 135:46.0 138:25.0 142:40.0 143:58.0 145:57.0 146:50.0 147:2095.0 148:321.0 149:125.0 155:24.0 157:368.0 158:58.0 159:41.0 160:684.0 161:118.0 162:34.0 163:56.0 164:21.0 165:33.0 173:49.0 184:32.0…	C00738	206	WQZGKKKJIJFFOK-UHFFFAOYSA-N	519	460	673	376	493	1220	4312	2571	1489	294	910	575	749	571	2312	615	847	4812	940	3520	582	742	729	362	800	1028	756	892	1930	305	970	792	1208	1258	244	4212	3040	1346	5994	3209
glycolic acid	227636	177	1971	86:321.0 87:877.0 88:2215.0 89:1177.0 90:166.0 92:46.0 95:690.0 98:47.0 99:43.0 100:1.0 101:491.0 102:395.0 103:3236.0 104:445.0 105:759.0 106:5.0 107:431.0 110:197.0 113:123.0 114:1.0 115:778.0 116:235.0 117:2708.0 118:351.0 119:694.0 120:123.0 121:18.0 124:3.0 131:2476.0 132:305.0 133:6921.0 134:1259.0 135:297.0 144:1.0 146:382.0 147:57199.0 148:9255.0 149:5731.0 150:464.0 151:221.0 161:3331.0 …	C00160	757	AEMRFAOFKBGASW-UHFFFAOYSA-N	1176	1639	2400	2326	2162	2372	2855	2853	1466	2137	2747	4731	3186	2064	2079	2490	2292	2324	2836	2897	2842	1641	2024	3178	3861	1431	1873	4343	1868	4088	1932	2103	4032	3827	2869	4261	2831	2669	4172	3727
glycine	368707	248	6	85:2882.0 86:87494.0 87:10917.0 88:4018.0 89:822.0 92:65.0 93:42.0 94:27.0 95:426.0 96:50.0 97:67.0 99:1489.0 100:53029.0 101:10140.0 102:5892.0 103:928.0 105:1276.0 110:146.0 113:1787.0 114:44.0 115:2820.0 116:1864.0 117:12472.0 118:47.0 119:3422.0 122:40.0 123:85.0 125:63.0 129:156.0 130:9640.0 131:7466.0 132:862.0 133:31722.0 134:5661.0 135:2633.0 144:2949.0 145:349.0 146:1208.0 147:26782.0 14…	C00037	750	DHMQDGOQFOQNFH-UHFFFAOYSA-N	8256	20441	43785	12989	23059	19635	39982	54462	9473	24602	39667	103150	60559	21992	19055	55717	595138	23588	68654	40060	66403	17619	36849	52719	36821	33544	32893	27638	42762	54373	22546	28429	66447	41374	51449	46976	53825	44631	124267	99328
glycerol-alpha-phosphate	590747	357	1687	85:750.0 87:846.0 88:468.0 89:1193.0 90:82.0 91:168.0 92:114.0 93:127.0 94:26.0 95:116.0 97:212.0 98:232.0 99:483.0 101:13348.0 102:1461.0 103:9463.0 104:991.0 105:689.0 106:35.0 107:239.0 108:36.0 109:51.0 111:385.0 113:2220.0 114:284.0 115:2195.0 116:2414.0 117:2066.0 118:407.0 119:755.0 120:59.0 121:349.0 122:90.0 123:101.0 125:30.0 127:73.0 129:6764.0 130:1365.0 131:6671.0 132:512.0 133:8224.…	C03189	754	AWUCVROLDVIAJX-UHFFFAOYSA-N	3339	2390	2724	2463	2633	1470	2505	2380	3627	1852	2413	3242	2789	3181	1426	1498	6367	1820	1945	2751	2171	1574	1932	3124	3385	2247	1910	1820	2052	1719	3219	4136	2820	2139	3132	2549	2239	2319	1803	2488
glycerol-3-galactoside	805227	204	1693	89:176.0 90:53.0 99:49.0 101:827.0 102:83.0 103:3126.0 104:331.0 105:191.0 109:15.0 113:33.0 115:65.0 116:293.0 117:746.0 118:35.0 119:28.0 122:1.0 123:8.0 128:61.0 129:2561.0 130:485.0 131:662.0 132:17.0 133:977.0 135:25.0 141:39.0 142:42.0 143:281.0 147:3311.0 148:255.0 149:318.0 151:50.0 155:78.0 156:127.0 157:175.0 159:38.0 160:42.0 161:110.0 163:57.0 169:415.0 170:55.0 171:14.0 175:57.0 177:…	C05401	16048618	NHJUPBDCSOGIKX-NTXXKDEISA-N	12217	14043	12760	10372	17179	10721	85686	23303	14131	22890	26256	25755	57353	24259	15165	45620	26597	42041	88492	30903	10147	10046	19559	12459	26064	15765	30865	21874	18645	33678	39414	19957	1475	39085	20640	25145	45548	12764	75727	85135
glycerol	344466	205	30	85:1069.0 86:1979.0 87:2157.0 88:1086.0 89:5466.0 90:494.0 91:283.0 94:134.0 97:170.0 99:483.0 100:547.0 101:7688.0 102:1229.0 103:30772.0 104:2994.0 105:1697.0 106:143.0 108:135.0 109:140.0 111:130.0 112:89.0 113:993.0 114:232.0 115:2539.0 116:2329.0 117:35562.0 118:3659.0 119:3831.0 120:444.0 121:441.0 122:107.0 123:185.0 124:113.0 128:225.0 129:5116.0 130:612.0 131:6207.0 132:1094.0 133:25238.…	C00116	753	PEDCQBHIVMGVHV-UHFFFAOYSA-N	4988	11490	1072	5541	2442	2078	34190	859	3769	3853	9784	9339	6033	6051	8013	16762	6543	7931	31416	6206	4665	8173	12769	4012	9454	5683	8748	8871	5891	11677	16510	9257	12931	7990	11127	1755	5436	5355	3365	17950
glyceric acid	377495	189	48	87:199.0 89:698.0 90:111.0 93:56.0 98:33.0 99:176.0 100:63.0 101:1315.0 102:3672.0 103:4054.0 104:371.0 105:293.0 106:106.0 107:60.0 108:48.0 113:36.0 114:94.0 115:261.0 116:366.0 117:2480.0 119:409.0 122:34.0 130:941.0 131:1036.0 133:4658.0 135:416.0 142:23.0 147:8908.0 148:1388.0 149:813.0 157:22.0 158:22.0 159:33.0 161:42.0 162:30.0 163:86.0 166:42.0 175:382.0 176:31.0 177:220.0 189:3993.0 190…	C00258	439194	RBNPOMFGQQGHHO-UWTATZPHSA-N	30171	53568	54784	36056	55491	52004	145932	136167	71640	102161	102559	113133	171783	103566	104162	60066	103425	98085	152027	159245	66809	60128	80127	109336	95298	84727	150679	138103	87767	133688	118480	93800	96037	129675	87801	108310	145699	48304	225606	161876
glutamine	570444	173	488	85:320.0 86:131.0 87:210.0 88:62.0 90:1200.0 91:116.0 94:17.0 98:80.0 99:124.0 100:266.0 102:138.0 103:103.0 114:52.0 115:525.0 116:901.0 117:302.0 118:42.0 126:35.0 127:132.0 128:301.0 130:210.0 131:885.0 132:137.0 133:183.0 139:322.0 140:222.0 142:132.0 143:29.0 144:99.0 145:60.0 146:114.0 147:762.0 154:48.0 155:1408.0 156:2872.0 157:643.0 158:433.0 159:51.0 166:15.0 167:39.0 172:138.0 173:3030…	C00064	5961	ZDXPYRJPNDTMRX-VKHMYHEASA-N	1252	7047	4441	1740	5178	1585	7180	2545	1846	1510	2031	2240	6662	11428	6468	2150	5906	1102	1963	2671	2793	1476	8301	5196	3958	4935	1748	1144	3237	2963	1243	3174	4596	1490	3227	2224	4026	2410	1080	5232
glutamic acid	529100	246	28	85:1143.0 86:983.0 87:725.0 88:453.0 89:313.0 90:36.0 91:51.0 95:189.0 96:269.0 97:224.0 98:467.0 99:626.0 100:5243.0 101:1252.0 102:493.0 103:1043.0 104:79.0 105:259.0 108:335.0 109:58.0 110:448.0 111:44.0 112:737.0 113:669.0 114:1398.0 115:911.0 116:669.0 117:712.0 118:217.0 119:303.0 120:26.0 122:179.0 123:41.0 125:90.0 126:202.0 127:190.0 128:17149.0 129:3445.0 130:1476.0 131:1330.0 132:969.0…	C00025	33032	WHUUTDBJXJRKMK-VKHMYHEASA-N	130639	236358	207167	161709	169326	112591	410230	364155	133447	280162	253207	358206	309795	234462	278817	108050	212280	248265	335620	388917	231103	229793	238962	374053	346744	175174	338204	499054	210032	398996	290348	256810	313719	342145	318052	378994	331028	142111	442719	364026
glucose-6-phosphate	818275	387	308	89:2051.0 90:203.0 91:178.0 94:11.0 95:62.0 98:94.0 99:125.0 100:221.0 101:1887.0 102:354.0 103:2375.0 104:220.0 105:395.0 107:50.0 109:82.0 111:94.0 112:58.0 113:214.0 115:231.0 116:632.0 117:455.0 119:268.0 121:26.0 122:30.0 125:55.0 128:126.0 129:3069.0 130:602.0 131:1273.0 132:58.0 133:2409.0 134:158.0 135:122.0 137:37.0 140:51.0 141:115.0 142:97.0 143:74.0 144:29.0 145:148.0 146:37.0 147:487…	C00092	5958	NBSCHQHZLSJFNQ-GASJEMHNSA-N	2165	935	2285	1469	2442	608	417	2238	1502	1426	2755	2590	1435	4124	2232	139	2479	3206	648	4348	2308	3008	4216	4825	2831	1397	4039	5118	1390	3067	3061	3289	6364	3927	4453	9635	3488	1946	1349	784
glucose-1-phosphate	594647	217	3167	85:385.0 86:98.0 87:248.0 88:286.0 89:468.0 90:224.0 92:20.0 95:218.0 99:284.0 101:1180.0 103:1916.0 104:47.0 107:220.0 109:96.0 110:193.0 111:260.0 112:20.0 113:386.0 114:41.0 115:209.0 116:863.0 117:2309.0 118:189.0 119:243.0 125:12.0 126:151.0 128:127.0 129:1571.0 130:306.0 131:508.0 132:123.0 133:2331.0 134:352.0 135:130.0 136:1.0 139:40.0 140:858.0 141:105.0 142:138.0 143:915.0 144:125.0 145…	C00103	65533	HXXFSFRBOHSIMQ-VFUOTHLCSA-N	1976	2305	213	1408	2223	2867	436	4133	2892	2359	2952	7030	3916	360	2688	3551	8108	1080	5139	4299	4349	3009	2764	1453	2230	300	3152	550	3379	324	2991	4648	5209	2535	3323	9549	3493	892	5963	511
glucose	657941	319	88048	85:202.0 86:370.0 87:15814.0 88:1126.0 89:2841.0 90:290.0 94:48.0 96:161.0 99:1499.0 100:716.0 101:1285.0 102:364.0 103:4860.0 104:294.0 105:345.0 106:230.0 107:66.0 108:14.0 109:115.0 110:221.0 111:151.0 112:87.0 113:1299.0 114:223.0 115:482.0 116:983.0 117:7481.0 118:924.0 119:347.0 120:121.0 123:14.0 125:40.0 126:47.0 127:53.0 128:778.0 129:7452.0 130:1046.0 131:1985.0 132:199.0 133:2609.0 134…	C00221	64689	WQZGKKKJIJFFOK-VFUOTHLCSA-N	8412	10560	13440	4496	7386	16781	80987	44378	22481	27554	26084	37926	35171	27571	36932	21572	48052	67339	67729	60174	9981	16328	14275	19457	8040	18203	59325	66032	28262	36724	25579	22743	34375	28946	18357	71693	67740	24839	111827	57570
gluconic acid	693148	333	7501	87:39.0 89:155.0 99:15.0 100:306.0 101:268.0 102:393.0 103:2729.0 104:264.0 105:196.0 109:2.0 111:2.0 113:144.0 116:8.0 117:1117.0 118:12.0 127:30.0 129:1186.0 130:285.0 131:546.0 132:183.0 133:997.0 134:13.0 137:1.0 139:7.0 140:38.0 141:4.0 142:28.0 143:746.0 144:263.0 145:25.0 147:6161.0 148:1144.0 149:642.0 150:39.0 151:46.0 153:74.0 154:66.0 155:3.0 157:599.0 159:89.0 160:27.0 161:88.0 164:14…	C00800	6857417	RGHNJXZEOKUKBD-QTBDOELSSA-N	77	149	485	135	142	242	660	372	330	397	334	706	670	194	464	170	416	622	1137	559	361	294	361	254	164	307	487	603	356	539	414	532	359	410	285	810	438	318	898	859
glucoheptulose	828606	217	3191	85:139.0 86:13.0 89:1593.0 91:2.0 94:55.0 97:1692.0 98:126.0 99:121.0 100:313.0 101:365.0 103:5867.0 104:480.0 105:349.0 109:19.0 111:2.0 114:1800.0 115:154.0 116:242.0 117:2040.0 118:246.0 119:195.0 120:35.0 122:30.0 128:61.0 129:1591.0 130:174.0 131:183.0 133:1318.0 134:156.0 136:15.0 141:68.0 142:187.0 143:391.0 144:75.0 147:6372.0 148:889.0 149:623.0 152:13.0 154:11.0 156:61.0 157:517.0 158:1…	C02076	5459879	HSNZZMHEPUFJNZ-SHUUEZRQSA-N	920	171	935	1456	1786	7066	3013	1806	1406	1510	2718	2533	1127	2789	2332	717	476	3009	2130	2647	100	1965	2309	3105	2396	1422	2666	2732	1465	2577	2977	3142	1246	3021	2717	3190	2541	11432	2855	2098
galactose-6-phosphate	828102	387	84204	85:352.0 86:18.0 87:173.0 88:29.0 89:238.0 90:3.0 95:35.0 97:215.0 98:44.0 99:408.0 100:111.0 101:1564.0 102:235.0 103:2611.0 104:160.0 105:125.0 107:126.0 108:137.0 109:343.0 111:347.0 112:25.0 113:1282.0 114:117.0 115:510.0 116:778.0 117:1716.0 118:101.0 119:265.0 120:13.0 121:88.0 125:45.0 127:291.0 128:9.0 129:11377.0 130:1380.0 131:1525.0 132:194.0 133:3384.0 134:381.0 135:599.0 136:15.0 137…	C01113	439404	NBSCHQHZLSJFNQ-SVZMEOIVSA-N	484	295	303	244	449	479	119	294	400	282	616	356	444	553	652	146	699	498	130	705	520	389	628	373	325	430	411	346	363	322	1050	1186	412	355	359	988	421	655	265	348
galactose	647344	319	18170	86:108.0 88:33.0 98:14.0 103:1972.0 104:148.0 105:366.0 106:62.0 111:15.0 114:33.0 115:4.0 117:1013.0 118:89.0 124:2.0 129:1498.0 130:194.0 131:323.0 133:272.0 143:92.0 145:5.0 147:2937.0 148:388.0 149:260.0 150:41.0 157:927.0 158:88.0 160:1205.0 161:85.0 162:28.0 163:43.0 174:29.0 175:8.0 176:2.0 182:4.0 184:5.0 186:19.0 189:367.0 190:11.0 191:326.0 192:88.0 193:25.0 201:22.0 202:12.0 205:2672.0…	C00984	439357	WQZGKKKJIJFFOK-PHYPRBDBSA-N	53096	66453	84955	32554	46379	106663	512981	294524	149850	171167	159529	249055	220205	173843	252918	150708	313799	443341	487541	427126	58621	105996	93590	123330	55030	116824	382081	430253	187819	245583	163217	135956	211523	189294	114294	487228	415452	162039	734073	393074
galactonic acid	690882	292	4706	85:918.0 86:238.0 87:865.0 88:630.0 89:3376.0 90:737.0 91:316.0 95:57.0 96:68.0 97:1011.0 98:413.0 99:1406.0 100:448.0 101:4514.0 102:3806.0 103:26292.0 104:2417.0 105:1403.0 106:36.0 107:255.0 108:13.0 109:160.0 110:149.0 111:353.0 112:80.0 113:956.0 114:440.0 115:1587.0 116:1106.0 117:12863.0 118:1333.0 119:1189.0 124:209.0 125:121.0 126:8.0 127:610.0 128:752.0 129:11296.0 130:3317.0 131:4665.0…	C00880	128869	RGHNJXZEOKUKBD-MGCNEYSASA-N	703	1052	1184	778	973	781	879	873	685	932	482	2155	520	2001	387	562	1353	1669	220	1895	914	1081	1269	277	130	686	396	1494	1045	1481	1754	1418	2418	1563	1434	2183	2027	761	2476	1755
galactinol	1017580	204	1975	85:17.0 86:36.0 87:46.0 88:20.0 97:9.0 99:36.0 101:68.0 102:47.0 103:1462.0 104:144.0 105:69.0 111:44.0 116:13.0 117:137.0 118:2.0 122:4.0 124:26.0 125:24.0 129:1340.0 130:121.0 131:155.0 133:138.0 136:13.0 139:5.0 140:38.0 142:58.0 143:185.0 144:24.0 147:1783.0 148:114.0 149:219.0 153:11.0 154:30.0 155:123.0 156:92.0 157:109.0 158:4.0 159:4.0 161:42.0 163:14.0 164:29.0 165:10.0 168:5.0 169:376.0…	C01235	11727586	VCWMRQDBPZKXKG-ZNVDUFQESA-N	13372	38066	29291	20002	22694	15595	114535	46000	21878	45966	32862	38810	60804	43531	45459	64713	41544	51190	75554	56938	20438	18696	33786	35723	35951	30383	53745	66924	28537	54149	40265	27285	51504	44302	33228	64982	65855	27492	77059	70732
fumaric acid	390016	245	14755	85:387.0 86:38.0 87:9.0 88:13.0 89:36.0 91:8.0 92:19.0 93:21.0 94:2.0 95:36.0 96:23.0 97:35.0 98:167.0 99:149.0 100:30.0 101:19.0 102:3.0 103:106.0 104:6.0 105:54.0 106:32.0 108:1.0 109:14.0 111:16.0 113:179.0 114:8.0 115:714.0 116:73.0 117:197.0 118:25.0 119:46.0 120:15.0 121:3.0 122:5.0 123:4.0 125:11.0 126:132.0 127:348.0 128:131.0 129:57.0 130:40.0 131:175.0 132:35.0 133:1168.0 134:224.0 135:…	C00122	444972	VZCYOOQTPOCHFL-OWOJBTEDSA-N	51808	96098	65138	47500	80207	94701	232996	195495	50322	114421	99384	64101	158132	102960	152032	66159	42236	69460	224347	162732	72101	69033	104847	123357	138902	96630	143201	193791	90252	214234	83097	64456	157669	151536	99067	105311	132895	34361	173616	226875
fructose-6-phosphate	804279	315	6431	85:175.0 86:55.0 87:366.0 88:157.0 89:2236.0 90:436.0 92:4.0 94:18.0 96:197.0 98:32.0 99:369.0 100:408.0 101:1519.0 102:775.0 103:257.0 104:1131.0 105:281.0 106:108.0 109:60.0 111:305.0 113:195.0 114:242.0 115:86.0 116:26.0 117:911.0 118:370.0 120:83.0 121:101.0 122:34.0 124:89.0 126:163.0 128:84.0 129:4295.0 130:1211.0 131:850.0 132:289.0 133:2271.0 134:314.0 135:693.0 136:141.0 137:22.0 138:85.…	C05345	440641	BGWGXPAPYGQALX-ARQDHWQXSA-N	1119	397	1345	739	1176	422	258	989	655	498	1369	1499	684	1770	833	174	811	1268	364	1613	1393	751	1819	2814	1927	446	1611	2158	682	1119	1289	1599	3139	1647	1839	4397	1568	652	645	295
fructose	641863	307	50366	86:65.0 87:79.0 88:18.0 89:2281.0 90:143.0 99:37.0 100:388.0 101:537.0 102:77.0 103:13851.0 104:1258.0 105:563.0 113:20.0 114:164.0 115:201.0 117:1833.0 118:120.0 119:138.0 122:14.0 125:109.0 128:143.0 129:782.0 130:84.0 131:499.0 133:1810.0 134:211.0 135:10.0 136:17.0 142:22.0 143:105.0 145:56.0 147:4583.0 148:705.0 149:481.0 150:25.0 151:26.0 156:27.0 157:146.0 159:19.0 163:118.0 167:3.0 171:41…	C02336	439709	RFSUNEUAIZKAJO-ARQDHWQXSA-N	11639	10953	15716	5715	7748	31699	109399	64057	40788	38297	18888	36395	34893	20090	59125	40543	79083	123826	143643	93403	10742	15706	14866	18271	15039	24511	100775	104837	47725	58054	24003	18898	26738	28961	20337	111368	73903	36363	152428	80902
ferulic acid	732779	338	14814	85:35.0 86:52.0 87:36.0 88:252.0 89:926.0 90:120.0 91:235.0 92:43.0 93:27.0 94:29.0 95:40.0 97:6.0 98:21.0 99:29.0 101:30.0 102:222.0 103:196.0 104:38.0 105:67.0 106:8.0 107:131.0 109:38.0 110:53.0 111:14.0 112:24.0 114:2.0 115:318.0 116:103.0 117:412.0 118:150.0 119:161.0 120:2.0 121:50.0 122:3.0 123:12.0 125:13.0 126:30.0 127:39.0 128:15.0 129:111.0 130:123.0 131:114.0 132:24.0 133:221.0 134:13…	C01494	445858	KSEBMYQBYZTDHS-HWKANZROSA-N	582	1995	1175	884	1845	2082	5611	4141	717	1017	2257	955	3526	1931	2791	135	290	1055	4364	2705	1976	1387	2302	2823	2854	1081	2821	3773	1686	3678	1852	1151	3011	3035	2204	1159	2519	592	2705	3654
ethanolamine	343800	174	45341	85:17544.0 86:175868.0 87:37978.0 88:16848.0 89:41209.0 90:4709.0 91:10643.0 92:1773.0 93:2745.0 94:638.0 95:902.0 96:1260.0 97:1477.0 98:2978.0 99:7231.0 100:169810.0 101:52380.0 102:24044.0 103:172854.0 104:24239.0 105:38562.0 106:5669.0 107:15911.0 108:1840.0 109:5126.0 110:2504.0 111:841.0 112:951.0 113:9857.0 114:19793.0 115:72673.0 116:28088.0 117:182126.0 118:22232.0 119:55318.0 120:8272.0…	C00189	700	HZAXFHJVJLSVMW-UHFFFAOYSA-N	11110	31869	10396	16653	8505	6495	84597	21735	14060	27908	38080	34417	48950	24320	27745	22525	25797	36679	40882	42303	10429	21978	20548	26677	24912	16251	40682	36588	9491	46949	52502	14346	15873	48410	9128	29328	35230	9326	116180	39383
ethanol phosphate NIST	317291	211	100892	87:78.0 88:97.0 89:256.0 91:314.0 92:90.0 93:145.0 94:40.0 98:266.0 99:46.0 102:181.0 103:1317.0 104:160.0 105:416.0 106:296.0 107:321.0 108:142.0 109:166.0 110:48.0 113:54.0 114:59.0 115:794.0 116:181.0 117:169.0 118:90.0 119:551.0 120:74.0 121:445.0 123:467.0 127:77.0 128:49.0 129:30.0 131:211.0 132:149.0 133:4081.0 134:722.0 135:1706.0 136:99.0 137:1236.0 138:139.0 139:133.0 140:21.0 143:24.0 …				641	345	1526	865	218	140	118	112	193	113	165	1510	1141	2233	1144	265	340	170	341	157	1065	2277	386	127	277	229	127	225	236	262	312	949	822	368	1207	2727	190	98	317	397
erythronic acid lactone	407495	247	3187	85:740.0 87:3579.0 88:246.0 89:932.0 90:92.0 94:99.0 95:54.0 96:32.0 97:5.0 99:977.0 101:9109.0 102:4849.0 103:6518.0 104:607.0 105:399.0 106:72.0 110:101.0 111:218.0 112:66.0 113:544.0 114:12.0 115:863.0 116:4791.0 117:12.0 118:116.0 119:763.0 120:15.0 121:13.0 122:10.0 123:4.0 124:2.0 125:6.0 126:181.0 129:2421.0 130:1157.0 131:4670.0 132:1087.0 133:3217.0 134:1524.0 135:43.0 136:53.0 137:10.0 …	C02341	5325915	SGMJBNSHAZVGMC-PWNYCUMCSA-N	1797	2989	3856	2099	3158	2860	7451	6109	2594	5276	4697	7469	6420	5136	5341	1972	7429	6324	6724	4621	3325	3858	4713	5193	5977	3206	5540	7454	4047	5896	4788	4467	6773	6023	5426	6330	6991	3423	8093	5865
erythritol	471922	217	92	86:57.0 87:443.0 89:682.0 90:92.0 99:480.0 100:41.0 101:1823.0 103:7046.0 104:676.0 105:300.0 106:59.0 109:27.0 111:45.0 113:474.0 115:473.0 116:1861.0 117:6123.0 118:476.0 119:295.0 127:453.0 129:1559.0 130:129.0 131:448.0 133:1902.0 134:216.0 144:53.0 147:9776.0 148:785.0 149:656.0 158:25.0 159:8.0 163:98.0 169:60.0 174:40.0 175:153.0 176:58.0 177:60.0 183:21.0 189:1255.0 190:194.0 191:893.0 19…	C00503	222285	UNXHWFMMPAWVPI-ZXZARUISSA-N	520	1307	1907	1213	1319	2741	7365	6392	3268	5845	2001	2189	1824	570	5691	1433	4282	5120	4297	4507	1109	1389	542	2479	2314	3980	5144	8245	3972	5836	1132	2248	1549	2384	2320	3412	3735	2090	6340	4611
dehydroascorbic acid	632888	173	100880	85:188.0 86:168.0 87:206.0 89:358.0 92:24.0 94:58.0 95:53.0 97:62.0 98:21.0 99:95.0 101:2206.0 102:138.0 103:2933.0 104:214.0 105:82.0 106:43.0 109:49.0 111:49.0 112:45.0 113:298.0 115:490.0 116:700.0 117:1536.0 118:190.0 119:111.0 122:28.0 125:67.0 129:3581.0 130:165.0 131:1327.0 132:276.0 133:865.0 134:120.0 135:30.0 136:36.0 143:376.0 145:40.0 147:5252.0 148:1031.0 149:710.0 150:75.0 151:60.0 …	C05422	440667	SBJKKFFYIZUCET-JLAZNSOCSA-N	9784	18504	23191	13244	15522	8489	26758	21838	10223	13106	12236	16671	15531	13123	13059	9200	12573	19352	25281	18488	8441	8805	12578	15862	13764	9547	15114	16085	9883	19993	12891	13850	17486	17567	13650	13236	23017	9111	26310	18929
cysteine-glycine	715335	220	2787	85:185.0 86:404.0 88:100.0 90:67.0 91:332.0 92:34.0 94:53.0 97:57.0 98:151.0 99:49.0 100:1375.0 101:377.0 102:262.0 103:390.0 104:15.0 105:20.0 107:142.0 110:50.0 112:23.0 113:69.0 114:78.0 115:367.0 116:813.0 118:39.0 126:62.0 129:25.0 130:279.0 131:65.0 132:916.0 134:134.0 135:1.0 141:102.0 142:99.0 144:44.0 146:198.0 147:351.0 148:451.0 154:30.0 155:46.0 157:102.0 158:256.0 159:18.0 160:51.0 1…	C01419	439498	ZUKPVRWZDMRIEO-VKHMYHEASA-N	220	575	779	305	755	972	440	1348	454	264	1037	1004	518	538	372	1459	463	735	814	705	985	245	516	411	479	527	289	360	853	327	614	412	886	488	641	219	1042	653	639	479
citrulline	621404	157	1712	85:138.0 86:318.0 89:143.0 90:82.0 91:114.0 92:81.0 95:62.0 97:103.0 98:473.0 99:700.0 100:1254.0 101:216.0 102:109.0 103:52.0 104:50.0 107:195.0 108:36.0 109:94.0 110:101.0 111:43.0 113:64.0 114:128.0 115:311.0 116:35.0 117:38.0 118:54.0 120:48.0 122:24.0 124:39.0 126:87.0 127:262.0 128:173.0 129:140.0 130:668.0 132:139.0 133:229.0 134:91.0 138:26.0 140:306.0 141:1077.0 142:2134.0 143:284.0 144:…	C00327	9750	RHGKLRLOHDJJDR-BYPYZUCNSA-N	548	836	762	496	669	703	755	672	697	542	724	808	1104	1359	1010	6867	696	1176	3320	2100	561	737	734	861	641	668	910	1011	492	802	1062	939	1285	999	915	1339	1225	576	1992	2323
citric acid	617342	273	288	85:108.0 87:167.0 88:92.0 89:136.0 92:58.0 93:86.0 95:193.0 96:108.0 97:78.0 99:605.0 100:143.0 101:223.0 102:92.0 103:336.0 104:70.0 105:58.0 109:24.0 110:55.0 111:256.0 112:15.0 114:87.0 115:639.0 116:312.0 117:522.0 118:105.0 119:62.0 120:32.0 124:17.0 125:53.0 126:49.0 127:177.0 128:22.0 129:915.0 131:952.0 132:92.0 133:1929.0 134:60.0 135:258.0 136:35.0 137:44.0 139:90.0 140:83.0 141:331.0 1…	C00158	311	KRKNYBCHXYNGOX-UHFFFAOYSA-N	19181	31703	35591	20881	32733	21416	41191	43085	27168	31566	53449	52836	42370	47115	40383	14429	35966	40154	37139	57659	27242	28954	42488	55157	45509	25228	51397	62074	32141	56638	41519	46720	69784	52512	53084	53894	49575	22647	61518	40923
cis-caffeic acid	688023	219	16593	89:103.0 91:67.0 93:38.0 94:23.0 98:49.0 101:17.0 105:8.0 106:23.0 108:9.0 116:26.0 117:267.0 119:88.0 120:74.0 121:31.0 123:15.0 124:12.0 127:5.0 128:34.0 129:429.0 130:106.0 131:139.0 135:4.0 143:149.0 145:6.0 149:127.0 155:34.0 159:15.0 160:33.0 161:36.0 163:14.0 169:13.0 174:1.0 175:145.0 176:20.0 179:49.0 181:45.0 182:13.0 185:3.0 189:36.0 191:813.0 192:130.0 193:31.0 203:38.0 204:303.0 205:…		1549111	QAIPRVGONGVQAS-RQOWECAXSA-N	230	290	300	187	604	1184	4716	2519	1025	2083	439	447	439	803	3458	795	457	1301	3265	3425	216	194	300	353	317	1921	1672	3219	1051	3204	426	354	549	650	350	1197	1558	415	2467	2841
cellobiose	943858	160	16601	85:424.0 86:76.0 87:169.0 88:161.0 89:4008.0 90:391.0 91:438.0 92:82.0 95:173.0 96:344.0 97:791.0 98:171.0 99:410.0 100:998.0 101:1517.0 102:989.0 103:10221.0 104:1108.0 105:1717.0 106:161.0 107:163.0 108:20.0 109:431.0 110:194.0 111:328.0 112:17.0 113:564.0 114:484.0 115:793.0 116:616.0 117:7803.0 118:721.0 119:664.0 120:249.0 121:132.0 122:61.0 123:80.0 124:9.0 125:126.0 127:102.0 128:193.0 129…	C01971	6255		143	105	497	306	376	101	4878	383	97	123	426	463	1992	642	103	1547	111	295	845	148	92	169	513	805	1281	78	298	100	102	653	374	358	615	1204	442	514	118	72	3338	1358
capric acid	452386	229	50422	86:58.0 95:73.0 100:128.0 115:203.0 116:59.0 117:1692.0 118:22.0 129:683.0 130:12.0 131:212.0 132:438.0 143:65.0 145:173.0 154:11.0 168:16.0 183:18.0 185:23.0 201:16.0 229:495.0 230:98.0 243:21.0 244:16.0 338:5.0 388:4.0 421:13.0 452:4.0 478:6.0 497:4.0	C01571	2969	GHVNFZFCNZKVNT-UHFFFAOYSA-N	263	308	367	395	271	553	339	578	374	419	434	354	261	509	369	279	629	296	89	258	311	278	502	305	441	548	399	463	233	409	337	390	444	178	486	297	490	431	405	411
beta-sitosterol	1128225	129	3174	85:2766.0 86:101.0 87:57.0 89:458.0 91:5648.0 92:1009.0 93:4837.0 94:854.0 95:7005.0 96:398.0 97:1583.0 98:69.0 99:841.0 101:529.0 102:39.0 103:648.0 104:289.0 105:5798.0 106:1007.0 107:5082.0 108:945.0 109:3381.0 110:296.0 111:1228.0 112:109.0 113:310.0 114:25.0 115:1041.0 116:430.0 117:2402.0 118:725.0 119:4929.0 120:2342.0 121:4665.0 122:692.0 123:1370.0 124:121.0 125:512.0 127:195.0 128:627.0…	C01753	222284	KZJWDPNRJALLNS-VJSFXXLFSA-N	2143	2245	1906	2133	1746	2489	2443	3184	632	2161	1721	616	105	294	3119	249	386	2547	2613	285	2686	1536	2018	2212	2201	316	3326	782	2897	2687	1996	587	2818	2190	375	400	1952	1423	1892	2670
beta-alanine	435564	248	148	85:228.0 86:3117.0 87:240.0 90:32.0 93:32.0 95:19.0 99:386.0 100:1891.0 101:337.0 102:313.0 103:237.0 104:118.0 107:63.0 113:116.0 114:91.0 117:236.0 119:17.0 120:39.0 129:105.0 130:635.0 133:1533.0 134:301.0 135:92.0 137:24.0 142:51.0 146:224.0 147:2196.0 148:431.0 160:346.0 161:56.0 162:41.0 164:29.0 168:16.0 170:19.0 172:67.0 173:3.0 174:3380.0 175:583.0 176:292.0 181:27.0 187:19.0 188:94.0 18…	C00099	239	UCMIRNVEIXFBKS-UHFFFAOYSA-N	230	561	306	368	357	128	669	222	315	617	688	294	387	267	486	142	493	425	168	944	215	586	446	696	867	427	546	628	150	717	481	436	388	735	282	671	823	118	644	414
benzoic acid	339214	179	34148	85:1157.0 86:1734.0 87:2480.0 88:121.0 89:513.0 90:980.0 91:549.0 92:250.0 93:77.0 94:121.0 95:181.0 96:222.0 97:454.0 98:347.0 99:9572.0 101:42.0 102:702.0 103:388.0 104:400.0 105:35970.0 106:2911.0 107:507.0 108:188.0 109:90.0 111:1502.0 112:267.0 113:535.0 114:841.0 115:1284.0 116:2857.0 117:1721.0 118:67.0 119:303.0 120:76.0 121:549.0 122:100.0 123:143.0 125:83.0 126:12.0 127:218.0 128:145.0 …	C00180	243	WPYMKLBDIGXBTP-UHFFFAOYSA-N	3723	3718	4162	3985	3969	4709	4084	4407	3280	4948	4452	3862	3958	4017	4552	3779	4266	3164	3698	4081	3576	4177	3720	4060	4742	3687	4648	4946	3419	4711	2755	4178	4226	4447	4650	3453	4183	4367	3996	3461
behenic acid	920648	117	46315	89:63.0 90:3.0 96:62.0 98:113.0 116:141.0 117:2302.0 118:208.0 121:9.0 123:25.0 129:995.0 130:112.0 131:119.0 132:880.0 133:179.0 135:29.0 136:5.0 137:25.0 142:23.0 143:98.0 145:236.0 146:32.0 148:40.0 149:92.0 150:14.0 151:20.0 159:48.0 171:13.0 173:12.0 176:19.0 185:40.0 187:53.0 195:1.0 196:10.0 200:36.0 202:12.0 205:33.0 216:10.0 219:5.0 226:7.0 227:15.0 231:24.0 235:4.0 241:33.0 243:42.0 247…	C08281	8215	UKMSUNONTOPOIO-UHFFFAOYSA-N	2924	2574	3851	3203	1636	3644	4387	3449	5350	4083	4974	2979	3831	3781	4135	5143	5969	6003	6376	4005	2451	3439	3106	4658	3172	5871	5380	6251	4632	5828	4015	4780	5602	5714	3250	3959	3423	4430	6265	5744
aspartic acid	433075	160	287	86:152.0 88:122.0 91:67.0 92:45.0 93:73.0 98:137.0 99:170.0 100:1145.0 101:124.0 102:517.0 103:392.0 105:156.0 110:142.0 111:49.0 112:80.0 113:92.0 114:39.0 115:37.0 116:2662.0 117:3684.0 118:486.0 119:211.0 120:66.0 127:112.0 128:298.0 129:124.0 130:4406.0 131:731.0 132:165.0 133:305.0 134:133.0 135:52.0 138:53.0 139:28.0 140:17.0 142:64.0 143:100.0 144:616.0 145:135.0 146:248.0 147:2285.0 148:3…	C00049	5960	CKLJMWTZIZZHCS-REOHCLBHSA-N	138794	202407	191982	152247	166664	138096	239806	250046	123167	153548	218146	304482	234529	269429	204685	66803	192423	249464	325832	310353	220925	229232	236434	303448	302573	131059	242065	342626	125104	253551	279683	256349	318997	327732	303914	313657	232327	139030	351925	264528
asparagine	553078	188	146	86:261.0 87:142.0 88:87.0 89:283.0 90:151.0 91:43.0 92:46.0 93:35.0 98:167.0 100:1725.0 101:112.0 102:22.0 104:36.0 107:43.0 108:48.0 109:43.0 111:105.0 112:77.0 113:62.0 114:223.0 115:405.0 116:5151.0 117:1014.0 118:309.0 119:90.0 120:36.0 125:136.0 126:95.0 128:266.0 130:448.0 131:829.0 132:2241.0 133:857.0 134:239.0 135:54.0 137:47.0 141:1377.0 142:341.0 143:178.0 144:126.0 145:46.0 146:126.0 …	C00152	6267	DCXYFEDJOCDNAF-REOHCLBHSA-N	1244	2176	1723	1191	1262	1844	7257	4722	2087	3064	2987	4541	4043	3339	3686	2210	4269	5732	6582	7361	1731	2001	2025	3213	2395	2222	5296	6288	2653	5146	3164	2594	3782	3919	2431	6682	5853	2354	9945	6718
ascorbic acid	672898	332	238	85:135.0 86:135.0 87:248.0 88:196.0 89:2251.0 90:375.0 93:178.0 94:27.0 95:496.0 97:119.0 98:172.0 99:591.0 101:524.0 103:2328.0 104:337.0 105:143.0 109:261.0 111:411.0 113:46.0 114:178.0 115:672.0 116:132.0 117:10603.0 118:841.0 119:893.0 121:54.0 122:44.0 123:190.0 125:19.0 126:59.0 127:410.0 128:196.0 131:1308.0 132:231.0 133:3873.0 134:556.0 135:442.0 136:83.0 137:62.0 139:81.0 140:1.0 141:15…	C00072	54670067	CIWBSHSKHKDKBQ-JLAZNSOCSA-N	1127	3579	1912	1859	1258	133	662	752	360	192	220	138	133	159	161	1159	221	232	1590	505	160	119	237	237	244	79	211	242	272	416	232	213	187	368	96	204	509	201	790	619
arachidic acid	856421	117	291	85:167.0 89:444.0 90:10.0 92:58.0 93:400.0 94:80.0 95:656.0 98:494.0 99:384.0 100:46.0 102:86.0 105:51.0 107:116.0 110:60.0 111:101.0 113:12.0 115:21.0 116:933.0 117:16860.0 118:1459.0 119:650.0 120:71.0 125:117.0 128:67.0 129:7682.0 130:803.0 132:6486.0 133:1341.0 134:343.0 135:92.0 137:72.0 138:29.0 140:58.0 141:48.0 143:611.0 144:144.0 145:3932.0 146:417.0 157:65.0 159:172.0 160:80.0 161:46.0 …	C06425	10467	VKOBVWXKNCXXDE-UHFFFAOYSA-N	944	812	886	836	726	1425	1360	920	564	1159	1398	900	1272	1207	944	1250	1272	1289	1159	1156	780	1090	872	876	882	942	1294	835	1190	1061	1213	1035	1194	1312	874	985	1099	1024	1132	1316
arabitol	570685	217	17001	85:1293.0 86:336.0 87:2250.0 88:1800.0 89:10668.0 90:944.0 91:389.0 93:11.0 94:91.0 97:229.0 98:214.0 99:1575.0 100:556.0 101:9601.0 102:1764.0 103:111243.0 104:10199.0 105:5343.0 106:115.0 107:87.0 108:59.0 109:95.0 110:79.0 111:829.0 112:123.0 113:2239.0 114:485.0 115:2683.0 116:4353.0 117:51800.0 118:5071.0 119:3906.0 120:387.0 121:197.0 123:19.0 125:110.0 127:622.0 128:411.0 129:46607.0 130:5…	C01904	94154	HEBKCHPVOIAQTA-QWWZWVQMSA-N	707	1694	1742	978	1202	685	1816	1372	352	1145	489	1604	2384	1634	1010	890	1266	1700	1617	2017	1280	1303	1443	2443	2679	1027	14646	16827	741	446	1503	1909	2311	1247	2011	358	1509	816	2747	1834
arabinose	550621	217	17886	86:196.0 89:2673.0 90:148.0 94:55.0 96:34.0 98:43.0 99:8.0 100:396.0 101:964.0 102:266.0 103:16333.0 104:1233.0 105:1087.0 106:237.0 110:149.0 113:45.0 114:616.0 115:105.0 117:3661.0 118:554.0 119:207.0 120:10.0 124:7.0 126:124.0 127:161.0 128:115.0 129:1650.0 130:747.0 131:701.0 132:147.0 133:2102.0 134:407.0 138:78.0 140:8.0 141:65.0 142:245.0 143:71.0 144:85.0 145:240.0 147:7498.0 148:709.0 14…	C00216	6902	SRBFZHDQGSBBOR-ZRMNMSDTSA-N	437	1345	883	685	551	561	4323	922	875	1602	65	1939	2468	1340	1891	1316	1400	116	1890	1994	906	1023	1505	214	1594	996	1977	2128	1168	2159	1295	1119	1895	1793	1726	1178	1930	1007	2905	2332
aminomalonate	455754	218	413	86:2942.0 88:141.0 89:112.0 91:83.0 95:21.0 96:52.0 99:117.0 100:1404.0 101:500.0 102:258.0 103:262.0 105:161.0 113:119.0 114:63.0 115:110.0 116:295.0 117:454.0 119:188.0 120:63.0 121:40.0 122:45.0 131:1530.0 132:103.0 133:2100.0 134:376.0 143:19.0 144:92.0 147:5888.0 148:433.0 149:305.0 152:37.0 154:11.0 158:171.0 160:45.0 161:81.0 164:29.0 167:17.0 173:76.0 174:1023.0 175:272.0 176:72.0 178:67.…	C00872	100714	JINBYESILADKFW-UHFFFAOYSA-N	617	757	1075	627	863	588	1650	1269	742	1051	1487	1485	604	1458	1298	369	7462	1670	920	779	852	954	1240	963	592	1308	1470	1796	778	1870	1267	1210	1753	569	1340	1229	1832	667	3044	1074
alpha-ketoglutarate	507392	198	294	85:208.0 87:154.0 89:4657.0 90:84.0 91:201.0 94:49.0 98:155.0 99:133.0 101:112.0 102:113.0 103:234.0 110:90.0 112:1654.0 113:180.0 114:75.0 115:296.0 118:19.0 125:56.0 126:615.0 128:246.0 129:323.0 131:331.0 133:422.0 135:87.0 142:51.0 143:95.0 144:23.0 145:67.0 147:7768.0 148:1161.0 149:693.0 152:14.0 154:243.0 155:35.0 156:3139.0 157:398.0 158:205.0 159:36.0 160:14.0 161:16.0 163:100.0 170:1125…	C00026	51	KPGXRSRHYNQIFN-UHFFFAOYSA-N	1519	990	1536	1497	1993	868	2626	1070	1862	2346	1923	2506	1176	1649	1229	1284	4417	3452	1914	4348	687	831	1931	1278	1858	1866	2238	1910	1628	3523	1866	1838	1593	3267	1172	1902	4620	1006	3294	3611
allantoic acid	647453	331	16708	85:160.0 86:711.0 87:26.0 89:264.0 91:63.0 99:784.0 100:8165.0 101:1165.0 102:656.0 105:85.0 107:119.0 112:15.0 113:117.0 114:77.0 115:164.0 116:846.0 117:255.0 118:1.0 119:173.0 122:21.0 127:235.0 129:238.0 130:1765.0 131:780.0 132:465.0 133:1382.0 136:13.0 141:200.0 142:719.0 143:210.0 144:12.0 145:31.0 146:3257.0 147:3195.0 148:897.0 155:89.0 157:198.0 158:151.0 159:263.0 160:6.0 161:19.0 167:…	C00499	203	NUCLJNSWZCHRKL-UHFFFAOYSA-N	288	305	441	361	272	541	2397	1253	666	754	859	1199	1017	719	1111	639	1558	1906	2172	1982	301	539	467	562	571	533	1803	1933	905	1041	482	592	1038	836	595	2327	1796	855	3482	1749
alanine-alanine	523110	116	114683	86:4308.0 87:938.0 89:660.0 90:85.0 91:105.0 92:48.0 93:88.0 94:36.0 96:133.0 97:194.0 100:3903.0 101:1008.0 102:1184.0 103:1209.0 104:93.0 105:169.0 106:46.0 107:58.0 108:46.0 110:39.0 111:55.0 114:1266.0 116:90302.0 117:10500.0 118:8719.0 119:688.0 128:1227.0 129:2108.0 130:1543.0 132:128.0 133:262.0 134:42.0 135:72.0 137:33.0 141:9.0 143:370.0 144:409.0 146:171.0 150:55.0 153:40.0 157:764.0 15…				635	1090	904	1084	933	617	2010	1274	564	1231	1314	689	1813	1409	758	780	1039	1528	1341	2181	886	1319	1148	1396	1499	1179	1071	1942	1286	1421	1516	1245	1469	1628	1154	2108	1221	911	1462	1006
alanine	243971	116	34178	85:333.0 86:2106.0 87:467.0 88:280.0 89:5.0 90:53.0 91:138.0 92:168.0 93:215.0 94:1333.0 95:43.0 96:6.0 98:74.0 99:48.0 100:4652.0 101:1063.0 102:1419.0 103:3674.0 104:501.0 105:328.0 106:3.0 108:75.0 109:236.0 110:175.0 112:94.0 114:926.0 115:860.0 116:84295.0 117:10442.0 118:3671.0 119:545.0 120:126.0 121:65.0 122:38.0 123:90.0 124:32.0 125:42.0 126:107.0 127:278.0 128:1618.0 129:278.0 130:1195…	C00041	5950	QNAYBMKLOCPYGJ-REOHCLBHSA-N	78488	147627	98414	106611	98638	68946	187579	148725	95198	154670	121612	287165	159325	112357	100613	94308	153489	140007	292425	182327	126820	137577	134856	115409	181903	113210	156763	214892	93066	203737	155528	105822	160686	226084	173350	138661	147085	94669	366091	351585
adenosine-5-monophosphate	1038688	169	1726	89:44.0 90:17.0 95:28.0 99:134.0 100:1.0 101:125.0 103:17.0 109:23.0 111:98.0 113:1.0 114:17.0 115:10.0 121:48.0 125:109.0 129:374.0 133:166.0 137:3.0 140:48.0 141:68.0 142:69.0 143:116.0 147:698.0 151:31.0 153:46.0 156:6.0 157:17.0 158:16.0 162:7.0 164:3.0 165:144.0 169:2803.0 170:341.0 171:190.0 178:12.0 181:16.0 184:73.0 189:15.0 192:650.0 193:195.0 195:98.0 197:2.0 206:112.0 207:185.0 208:286…	C00020	6083	UDMBCSSLTHHNCD-KQYNXXCUSA-N	1319	2739	1660	2340	2664	763	3495	3607	2202	2076	1688	3200	2943	4381	3250	544	507	3181	1793	4185	2173	1822	3381	4418	5074	2912	3922	6064	1857	4390	3759	3422	4394	5623	3083	5945	3266	1028	2822	3279
adenosine	918039	236	290	85:353.0 86:112.0 89:208.0 95:41.0 98:54.0 99:460.0 100:35.0 101:439.0 102:88.0 103:2553.0 104:236.0 105:110.0 109:159.0 111:217.0 113:236.0 115:473.0 116:284.0 117:469.0 119:106.0 120:28.0 126:71.0 129:719.0 130:43.0 131:300.0 132:124.0 133:869.0 134:103.0 135:182.0 136:60.0 137:23.0 138:121.0 139:38.0 142:46.0 143:329.0 144:32.0 145:58.0 147:1456.0 148:317.0 149:320.0 151:23.0 153:75.0 155:49.0…	C00212	60961	OIRDTQYFTABQOQ-KQYNXXCUSA-N	338	2144	276	401	476	462	9430	1250	872	1645	521	1190	5386	813	1772	2020	1091	1477	9910	1287	350	390	1292	494	550	856	2204	1191	804	1687	2015	554	654	833	522	763	890	594	6593	4980
adenine	646701	264	16805	85:54.0 86:321.0 89:1488.0 90:133.0 93:347.0 98:87.0 99:756.0 100:1997.0 101:198.0 102:25.0 103:6633.0 104:1287.0 105:1860.0 109:62.0 110:219.0 111:200.0 113:321.0 114:523.0 116:1348.0 117:506.0 121:161.0 122:80.0 123:239.0 128:119.0 129:1675.0 130:525.0 131:379.0 133:1394.0 137:80.0 138:66.0 139:31.0 141:189.0 142:302.0 146:278.0 147:8308.0 149:2849.0 150:76.0 152:58.0 155:355.0 157:2692.0 158:5…				565	1130	650	635	608	420	1779	952	569	734	735	1210	1566	1014	788	999	482	792	1299	1241	684	636	797	885	1098	643	974	955	604	894	696	701	1035	966	863	804	1013	465	1745	1399
6-deoxyglucose	573663	117	85102	85:1382.0 86:894.0 87:839.0 88:367.0 89:5317.0 90:407.0 91:305.0 95:82.0 96:126.0 97:153.0 98:192.0 99:868.0 100:2605.0 101:2321.0 102:1181.0 103:5551.0 104:561.0 105:2504.0 106:242.0 107:146.0 108:149.0 109:70.0 110:120.0 111:250.0 112:338.0 113:533.0 114:1548.0 115:2124.0 116:1054.0 117:90320.0 118:9236.0 119:3823.0 120:191.0 121:50.0 122:58.0 124:133.0 125:98.0 126:205.0 127:703.0 128:771.0 12…	C08352	441480	SHZGCJCMOBCMKK-DVKNGEFBSA-N	1470	8746	10853	6965	7623	1458	4156	16317	6692	12999	3929	4213	14680	13128	12291	4965	11813	5306	10105	17929	8064	8010	10520	14780	16968	3143	12203	18088	9676	16345	3133	3622	4942	16149	5120	5547	6006	2620	7395	4889
6-deoxyglucitol	599776	117	92567	94:11.0 100:304.0 101:76.0 103:2237.0 104:125.0 105:2.0 107:17.0 108:3.0 111:91.0 115:237.0 117:14612.0 118:1585.0 119:511.0 124:19.0 127:18.0 129:2609.0 130:154.0 131:1029.0 135:11.0 137:25.0 143:739.0 144:63.0 147:5826.0 148:730.0 149:493.0 155:60.0 157:862.0 158:33.0 159:42.0 163:53.0 167:1.0 170:9.0 171:189.0 177:6.0 179:2.0 185:7.0 189:507.0 190:95.0 191:62.0 193:8.0 195:3.0 196:1.0 201:696.…		151266	SKCKOFZKJLZSFA-JGWLITMVSA-N	2412	5236	1057	4845	4381	3670	6306	1261	3004	4821	6961	2604	1466	1696	5467	2145	6168	2368	5264	10397	3700	4626	1802	2574	2053	4113	5658	1503	4540	10089	4873	4696	3453	2755	1343	2498	3740	2483	2676	8828
5-hydroxynorvaline NIST	494077	142	4757	85:2556.0 89:394.0 96:235.0 99:688.0 100:586.0 101:291.0 102:8.0 103:703.0 104:3.0 105:1.0 112:304.0 113:222.0 114:118.0 119:3.0 120:19.0 124:48.0 125:77.0 127:285.0 128:662.0 130:171.0 133:14.0 135:1.0 137:5.0 142:4928.0 143:260.0 144:192.0 145:1.0 147:690.0 154:5.0 156:20.0 158:115.0 163:1.0 168:42.0 169:3.0 170:144.0 171:345.0 172:40.0 177:3.0 186:57.0 189:2.0 190:1.0 191:6.0 204:3.0 205:41.0 …		95562	CZWARROQQFCFJB-UHFFFAOYSA-N	444	959	1152	600	744	865	2628	1597	1168	1744	176	1239	1002	1011	1622	491	2156	1739	2438	2536	589	823	1013	1142	967	452	1720	2822	998	3148	788	908	1432	1051	1404	2422	1653	1187	3094	2320
5'-deoxy-5'-methylthioadenosine	967036	236	21821	85:99.0 86:132.0 94:26.0 96:62.0 99:123.0 100:70.0 101:24.0 105:120.0 111:44.0 112:105.0 113:82.0 114:27.0 115:34.0 121:46.0 122:14.0 123:36.0 126:141.0 129:197.0 130:26.0 134:23.0 137:43.0 138:17.0 141:16.0 142:14.0 143:9.0 145:27.0 147:46.0 149:28.0 151:2.0 155:2.0 157:5.0 162:54.0 163:36.0 164:9.0 165:196.0 167:14.0 169:374.0 170:80.0 171:39.0 173:30.0 175:661.0 176:140.0 177:69.0 179:27.0 185…	C00170	439176	WUUGFSXJNOTRMR-IOSLPCCCSA-N	342	433	389	335	423	298	333	460	250	376	409	514	371	361	358	300	506	468	415	514	322	327	420	463	396	328	414	618	387	561	478	436	553	492	365	661	473	417	371	338
4-hydroxycinnamic acid	674616	219	18344	85:285.0 86:47.0 87:121.0 88:438.0 89:864.0 90:289.0 91:428.0 92:82.0 93:28.0 95:131.0 97:29.0 98:43.0 99:28.0 100:9.0 101:300.0 102:497.0 103:743.0 104:43.0 105:190.0 106:31.0 107:61.0 109:80.0 110:11.0 114:56.0 115:958.0 116:264.0 117:909.0 118:346.0 119:211.0 120:37.0 121:141.0 122:34.0 124:7.0 125:95.0 128:23.0 129:539.0 130:117.0 131:283.0 132:208.0 133:476.0 134:53.0 135:364.0 136:14.0 137:…	C00811	637542	NGSWKAQJJWESNS-ZZXKWVIFSA-N	8401	15540	9205	6563	11880	12665	39000	33729	6231	16569	15094	6738	24621	14602	24116	10298	2517	9193	36969	24969	11694	10350	17110	17786	19573	14135	17998	29646	13219	32217	12706	8188	26429	22071	14687	13414	17974	3142	25933	37514
4-aminobutyric acid	488730	304	1842	85:2931.0 86:36127.0 88:1868.0 89:824.0 90:367.0 91:21.0 92:27.0 93:383.0 94:61.0 95:474.0 96:289.0 97:896.0 98:1926.0 99:2673.0 100:23284.0 101:4921.0 102:4701.0 103:1487.0 104:675.0 105:715.0 106:24.0 107:184.0 108:203.0 109:406.0 110:716.0 111:335.0 112:2089.0 113:1884.0 114:3527.0 115:3212.0 116:3300.0 117:5040.0 118:1020.0 119:1376.0 120:195.0 121:54.0 122:39.0 123:55.0 124:233.0 125:201.0 1…	C00334	119	BTCSSZJGUNDROE-UHFFFAOYSA-N	276	481	202	285	199	117	1027	367	145	436	648	482	445	125	203	501	357	402	823	707	179	305	169	348	421	220	412	434	158	468	899	219	180	706	156	546	572	232	1153	333
3-phosphoglycerate	610734	227	1667	85:3431.0 86:914.0 87:3880.0 88:915.0 89:5026.0 90:691.0 91:1326.0 92:1132.0 93:2666.0 94:226.0 95:1037.0 96:384.0 97:379.0 98:1535.0 99:3192.0 100:1292.0 101:64790.0 102:7687.0 103:9445.0 104:1320.0 105:3744.0 106:1380.0 107:1485.0 108:512.0 109:573.0 110:30.0 111:263.0 112:119.0 113:943.0 114:479.0 115:8290.0 116:19606.0 117:11090.0 118:1967.0 119:6002.0 120:1081.0 121:3497.0 122:403.0 123:1251…	C00597	724	OSJPPGNTCRNQQC-UHFFFAOYSA-N	2360	2222	2435	4657	13142	2510	280	5472	4895	3735	10040	7495	4719	12697	2823	213	6159	3681	559	10748	7014	8017	11039	16868	14606	4589	5086	6642	5967	1264	6740	14110	13381	15288	9739	10620	10085	2355	954	1116
3-hydroxypropionic acid	269265	177	1977	85:317.0 87:1774.0 88:555.0 89:599.0 90:145.0 92:72.0 94:12.0 97:21.0 98:250.0 99:13.0 100:2863.0 101:1816.0 102:1129.0 103:1749.0 104:165.0 105:296.0 106:148.0 107:346.0 108:79.0 110:47.0 111:3.0 112:18.0 114:15.0 115:504.0 116:1895.0 117:741.0 118:214.0 124:3.0 125:97.0 127:452.0 128:11.0 129:912.0 130:261.0 131:1035.0 132:105.0 133:1862.0 134:111.0 135:188.0 139:1.0 140:13.0 142:22.0 143:205.0…	C01013	68152	ALRHLSYJTWAHJZ-UHFFFAOYSA-N	416	433	573	449	594	438	669	507	345	525	648	629	780	622	602	320	585	582	704	688	492	534	549	622	690	468	679	878	549	830	604	583	811	654	405	745	643	484	763	735
3,4-dihydroxycinnamic acid	748847	219	16546	85:1780.0 86:20.0 87:24.0 88:1684.0 89:4807.0 90:388.0 91:739.0 92:85.0 93:33.0 94:49.0 95:700.0 97:1259.0 98:647.0 99:413.0 101:816.0 102:963.0 103:1469.0 104:421.0 105:1160.0 106:113.0 107:601.0 108:95.0 109:940.0 110:199.0 111:64.0 112:116.0 113:303.0 115:3976.0 116:1253.0 117:4062.0 118:601.0 119:1232.0 120:1.0 121:523.0 122:115.0 123:7.0 124:63.0 125:51.0 127:648.0 128:467.0 129:1690.0 130:4…	C01197	689043	QAIPRVGONGVQAS-DUXPYHPUSA-N	228	326	234	227	2455	12236	30366	24064	4002	12596	510	1208	501	4333	17783	7738	1888	8603	27856	17396	92	364	553	449	479	10577	15691	25447	8682	22948	486	195	659	4388	378	10182	14712	3254	20976	25625
2-monoolein	941794	129	84531	85:232.0 87:211.0 88:58.0 89:445.0 91:823.0 92:128.0 93:916.0 94:354.0 95:1224.0 96:388.0 97:243.0 98:63.0 99:217.0 101:1656.0 102:154.0 103:14217.0 104:1223.0 105:902.0 107:335.0 108:145.0 109:395.0 110:153.0 111:102.0 112:25.0 113:248.0 114:23.0 115:284.0 116:221.0 117:652.0 119:259.0 120:34.0 121:300.0 122:28.0 123:125.0 124:65.0 125:21.0 128:32.0 129:8919.0 130:1155.0 131:1582.0 132:109.0 133…		5319879	UPWGQKDVAURUGE-KTKRTIGZSA-N	1390	1456	1745	1560	2327	1042	1431	1148	833	1846	1341	2245	1952	1958	2310	1031	1046	1752	831	1111	930	1268	1850	1929	2860	1109	1064	1885	1471	2028	1542	1465	2552	1794	1894	1738	1984	1293	928	854
2-ketoglucose dimethylacetal NIST	456913	234	3279	85:550.0 86:57.0 87:134.0 89:1458.0 90:27.0 97:161.0 98:75.0 99:166.0 100:599.0 101:360.0 102:937.0 103:2462.0 104:149.0 105:269.0 106:140.0 107:190.0 108:35.0 110:11.0 113:11.0 114:118.0 115:338.0 116:78.0 117:3820.0 118:403.0 119:95.0 125:10.0 126:250.0 129:382.0 130:1764.0 131:993.0 132:113.0 133:1460.0 134:349.0 135:11.0 143:370.0 144:48.0 145:234.0 146:278.0 147:7353.0 148:1141.0 149:868.0 1…		159630	DCNMIDLYWOTSGK-HSUXUTPPSA-N	6856	7929	11737	7055	10177	7668	17801	19038	9244	14554	19262	19702	17623	20248	17228	4578	18311	22572	12329	22673	11881	12535	15211	19357	17138	11546	18979	22772	11316	23314	16491	15630	24519	22572	19029	15262	26447	10158	20713	16913
2-hydroxyglutaric acid	506306	247	2000	85:987.0 86:115.0 99:30.0 101:119.0 103:121.0 105:91.0 115:9.0 116:84.0 117:39.0 129:3826.0 130:487.0 131:370.0 132:6.0 133:412.0 134:38.0 146:11.0 147:1685.0 148:252.0 149:537.0 150:24.0 157:1113.0 158:97.0 159:129.0 163:13.0 172:4.0 184:12.0 203:612.0 204:140.0 217:9.0 218:20.0 231:219.0 247:1048.0 248:174.0 249:17.0 349:124.0 350:3.0 354:11.0 477:11.0 479:1.0	C02630	43	HWXBTNAVRSUOJR-UHFFFAOYSA-N	214	197	163	168	157	112	290	249	150	255	295	326	268	315	177	124	183	261	250	284	165	166	222	243	234	233	269	272	236	238	246	202	284	291	238	222	297	140	164	177
2-deoxyerythritol	355045	117	102843	86:255.0 87:3691.0 88:1982.0 89:4813.0 90:485.0 91:620.0 92:107.0 94:88.0 95:139.0 98:138.0 99:1285.0 100:326.0 101:17767.0 102:2800.0 103:31803.0 104:2971.0 105:2763.0 106:180.0 109:94.0 110:87.0 111:355.0 112:163.0 113:481.0 114:229.0 115:7863.0 116:51006.0 117:147126.0 118:16979.0 119:8974.0 120:667.0 121:341.0 122:29.0 123:61.0 124:14.0 125:98.0 127:1061.0 128:237.0 129:15276.0 130:3803.0 131…		18302	ARXKVVRQIIOZGF-UHFFFAOYSA-N	418	919	1203	786	806	719	2167	2030	1012	1101	844	1274	1253	977	1653	542	1563	1378	1601	1773	796	993	998	1525	2047	1209	1485	1918	1293	2241	964	1306	1107	1189	1619	1481	1601	694	1628	1539
2,5-dihydroxypyrazine NIST	397526	241	2254	85:168.0 86:172.0 87:115.0 93:14.0 97:710.0 98:27.0 100:66.0 108:4.0 109:15.0 111:179.0 113:419.0 114:172.0 115:562.0 127:101.0 128:126.0 129:169.0 130:13.0 140:38.0 144:10.0 145:499.0 146:11.0 167:155.0 168:17.0 172:5.0 174:1.0 177:4.0 182:157.0 183:31.0 197:1.0 211:11.0 213:6.0 215:3.0 241:1811.0 242:397.0 243:132.0 255:138.0 256:387.0 257:73.0 258:12.0 302:5.0 311:2.0 328:1.0 337:1.0 395:8.0 4…		23368901	USHRADXTTYICIJ-UHFFFAOYSA-N	499	1052	380	544	486	579	1218	1089	320	825	989	620	1067	674	558	533	238	460	966	1104	818	532	592	751	1075	644	644	1394	431	1157	937	467	1010	1110	586	733	673	408	1077	1158
1-monopalmitin	901749	129	2070	85:11049.0 86:1066.0 87:1727.0 88:2503.0 89:4332.0 90:546.0 91:849.0 93:1712.0 94:656.0 95:11870.0 96:1156.0 97:8236.0 98:3082.0 99:3966.0 100:546.0 101:20046.0 102:2216.0 103:20674.0 104:2095.0 105:2096.0 106:183.0 107:1123.0 108:131.0 109:6523.0 110:712.0 111:3012.0 112:681.0 113:1739.0 114:217.0 115:2374.0 116:10634.0 117:15865.0 118:1742.0 119:1613.0 120:72.0 121:1202.0 122:204.0 123:3774.0 1…	C01885	14900	QHZLMUACJMDIAE-UHFFFAOYSA-N	521	574	479	417	434	645	440	420	468	318	685	1919	899	694	468	2144	398	726	1983	594	1328	415	661	445	406	513	503	576	1386	458	585	577	454	301	523	702	604	998	902	811
1-monoolein	952623	129	7508	85:574.0 86:56.0 87:709.0 88:73.0 89:747.0 90:78.0 91:856.0 92:154.0 93:1294.0 94:580.0 95:2736.0 96:562.0 97:1409.0 98:812.0 99:402.0 100:65.0 101:4011.0 102:484.0 103:7050.0 104:595.0 105:742.0 106:156.0 107:791.0 108:155.0 109:1114.0 110:270.0 111:672.0 112:115.0 113:214.0 114:24.0 115:456.0 116:1288.0 117:2529.0 118:273.0 119:379.0 120:122.0 121:917.0 122:237.0 123:624.0 124:165.0 125:190.0 1…		5283468	RZRNAYUHWVFMIP-KTKRTIGZSA-N	4239	4755	2367	324	2271	1697	5857	4088	2197	3591	8903	7515	2713	6907	4392	5262	4339	1931	3472	3588	4800	4144	7643	7423	8756	3108	2605	5416	2544	1792	7103	6306	8515	534	6430	3606	4915	3227	3159	5393
1,3-diaminopropane	546741	174	132262	85:271.0 86:7066.0 87:1248.0 88:332.0 95:184.0 98:80.0 100:3465.0 101:779.0 102:148.0 107:152.0 108:77.0 111:148.0 112:313.0 113:233.0 114:834.0 115:839.0 116:629.0 118:237.0 120:157.0 121:71.0 124:41.0 125:22.0 126:111.0 128:519.0 130:2783.0 131:714.0 134:374.0 136:88.0 138:84.0 139:19.0 140:73.0 141:97.0 142:225.0 144:261.0 145:178.0 146:627.0 152:55.0 153:60.0 156:131.0 157:111.0 158:487.0 160…	C00986	428	XFNJVJPLKCPIBV-UHFFFAOYSA-N	6690	5023	2833	7778	2102	1053	5471	2823	1106	8028	8987	12468	6908	494	691	1984	5084	7779	1911	11057	5636	9340	709	11259	12315	2325	1796	3077	2600	5259	12026	8216	10165	11415	3214	3607	7379	4096	4824	4750
171972	600000	156	171972	86:1008.0 87:256.0 88:222.0 90:245.0 94:189.0 96:280.0 97:328.0 98:717.0 100:3469.0 101:366.0 102:313.0 104:214.0 107:149.0 112:1011.0 113:678.0 114:1746.0 116:2134.0 118:20.0 119:321.0 121:86.0 126:499.0 128:4093.0 131:1699.0 132:1288.0 133:2351.0 139:1107.0 140:1327.0 141:56.0 142:377.0 144:424.0 145:1566.0 147:10332.0 148:1224.0 149:833.0 150:22.0 155:12949.0 156:35859.0 157:2758.0 158:1324.0 …				83853	186702	165912	162110	149038	116435	217668	227199	98346	168706	213950	200151	228392	227329	187677	77602	188495	121247	177922	359290	117188	148023	224980	280305	254671	138135	196840	212468	146758	337181	153332	155358	205553	237537	188464	216783	314031	83960	288366	306877
171971	619196	142	171971	85:723.0 86:2210.0 89:192.0 90:259.0 92:74.0 94:128.0 98:578.0 99:450.0 100:4187.0 101:103.0 102:1982.0 109:83.0 110:315.0 112:594.0 113:282.0 114:353.0 115:942.0 116:608.0 117:820.0 124:182.0 128:1141.0 130:499.0 131:1201.0 132:341.0 139:77.0 140:373.0 142:24823.0 143:2656.0 144:1067.0 147:2495.0 148:904.0 153:99.0 155:113.0 158:106.0 160:217.0 169:314.0 170:137.0 172:1044.0 173:40.0 174:7343.0 …				1110	2679	2232	1331	1936	674	1934	1375	1444	1403	2775	3717	3289	3010	2116	1522	2403	2947	3313	4040	1196	2943	2042	2483	3192	1405	1957	2157	1031	2115	3092	1887	3223	3633	2764	2939	3802	1075	5450	3912
171970	364523	142	171970	85:1055.0 86:1908.0 87:916.0 88:634.0 95:165.0 96:356.0 97:345.0 99:1005.0 100:3118.0 101:1393.0 103:251.0 106:185.0 107:211.0 108:134.0 113:1037.0 114:294.0 115:1417.0 118:96.0 121:64.0 126:275.0 128:58.0 131:365.0 133:1875.0 140:1177.0 142:96461.0 143:13706.0 144:4081.0 145:234.0 147:1734.0 148:505.0 155:204.0 170:1119.0 174:120.0 175:34.0 176:111.0 181:141.0 184:74.0 196:36.0 204:70.0 215:33.0…				1639	5388	4268	4031	2615	4765	9497	10926	1434	5310	4303	24511	3740	2248	2511	3424	7969	1136	12030	3414	9857	5452	5175	9193	17041	11481	6311	8141	4925	12219	3301	1972	4005	15942	4674	2760	4228	4865	11875	15025
171969	345575	158	171969	85:8915.0 86:14095.0 88:2455.0 90:1111.0 93:642.0 97:1620.0 98:7124.0 102:23926.0 104:1872.0 105:3635.0 109:648.0 116:3986.0 118:1334.0 128:2559.0 130:14542.0 131:10432.0 132:10158.0 134:3850.0 135:3656.0 139:666.0 140:440.0 142:1591.0 143:744.0 146:11630.0 150:757.0 152:225.0 154:242.0 156:1416.0 158:99428.0 159:13259.0 160:4156.0 161:473.0 162:359.0 164:227.0 167:916.0 168:223.0 170:1529.0 183:…				6248	15383	12531	12645	8799	6216	19411	18439	6310	18863	11121	30973	8894	9755	9112	8419	19051	6031	16983	19352	12604	14030	14811	16024	28733	21877	17087	24233	7304	30870	9796	8590	18918	30633	15098	14668	16942	10343	51759	39725
171564	664278	319	171564	85:2761.0 86:3346.0 87:4228.0 88:2103.0 89:31879.0 90:2123.0 91:1214.0 92:322.0 94:363.0 97:1045.0 98:901.0 99:2436.0 100:6060.0 101:8894.0 102:4115.0 103:50203.0 104:4606.0 105:11919.0 106:1065.0 107:316.0 108:116.0 110:513.0 111:514.0 112:1021.0 113:2200.0 114:4299.0 115:3545.0 116:2488.0 117:38102.0 118:4525.0 119:4119.0 120:510.0 123:43.0 124:103.0 126:858.0 127:1005.0 128:1579.0 129:38424.0 …				170	123	221	171	146	98	341	196	158	150	191	264	237	219	187	107	186	247	232	218	103	158	224	189	336	103	330	379	154	238	190	145	255	347	180	204	314	162	512	380
171298	408777	219	171298	85:3292.0 86:8314.0 87:9239.0 88:2146.0 89:1384.0 90:306.0 91:153.0 92:315.0 94:182.0 97:494.0 98:2338.0 100:29753.0 101:59367.0 102:12275.0 103:7014.0 104:972.0 105:1395.0 108:157.0 109:69.0 110:316.0 112:1534.0 113:915.0 114:5652.0 115:7842.0 116:2291.0 117:82641.0 118:9093.0 119:5575.0 120:42.0 121:295.0 122:99.0 125:29.0 128:17938.0 129:15821.0 130:16106.0 131:15835.0 132:12042.0 133:17512.0 …				4903	10059	8318	7909	5722	5023	9247	8492	4568	11018	5068	8665	7365	7774	6381	2049	10228	5497	4730	7244	10194	9345	6994	12607	18283	9283	9266	1650	1111	13941	5700	6730	12154	12564	15233	6283	5123	4852	18427	14538
170275	834701	217	170275	87:124.0 88:77.0 89:1244.0 90:205.0 93:153.0 94:141.0 97:1375.0 99:198.0 100:421.0 103:5820.0 104:453.0 105:795.0 106:312.0 107:415.0 108:163.0 110:115.0 111:167.0 113:441.0 114:733.0 115:466.0 116:357.0 117:2430.0 118:342.0 119:529.0 121:130.0 125:78.0 128:56.0 129:1248.0 130:524.0 131:492.0 132:502.0 133:1205.0 134:34.0 135:161.0 142:115.0 143:267.0 144:183.0 145:284.0 146:90.0 147:4839.0 148:8…				438	654	491	455	507	1192	1297	5024	1387	1581	798	1669	765	615	4415	1318	631	1534	2190	1360	581	742	757	892	902	990	1307	6009	2355	2225	620	593	353	629	777	4110	2212	749	2978	3644
168872	622407	102	168872	85:1945.0 86:1064.0 87:2004.0 88:1137.0 89:23810.0 90:1962.0 91:1483.0 92:343.0 93:957.0 94:1005.0 95:397.0 96:578.0 97:449.0 98:503.0 99:1558.0 100:2466.0 101:5054.0 102:57185.0 103:39430.0 104:3796.0 105:4017.0 106:505.0 107:569.0 108:1191.0 109:527.0 110:631.0 111:606.0 112:1533.0 113:1170.0 114:967.0 115:1655.0 116:3853.0 117:18957.0 118:2035.0 119:1751.0 120:1118.0 121:1143.0 122:697.0 123:2…				427	1296	899	418	768	3386	1436	4400	339	1158	1447	4973	2151	1617	1766	4060	1495	1354	10759	1285	4892	1422	1496	1510	1307	607	1334	768	3854	1245	1560	1161	1818	940	1777	1217	1426	386	2294	2252
161878	361182	341	161878	87:472.0 90:124.0 93:639.0 94:73.0 95:148.0 97:68.0 104:150.0 105:146.0 108:87.0 120:48.0 121:131.0 124:31.0 125:98.0 126:161.0 127:384.0 134:637.0 137:64.0 138:37.0 139:53.0 140:134.0 147:3817.0 148:637.0 149:365.0 154:112.0 155:718.0 161:91.0 163:671.0 164:157.0 165:213.0 166:43.0 167:40.0 168:32.0 173:25.0 175:30.0 177:163.0 178:59.0 179:333.0 180:26.0 181:121.0 182:58.0 185:14.0 188:37.0 189:…				767	300	268	466	236	230	346	389	220	555	1080	222	231	257	221	273	234	1046	179	1069	234	655	164	564	568	329	524	548	543	505	978	289	268	570	275	1037	298	389	964	206
161875	386583	217	161875	85:1641.0 89:407.0 91:1339.0 94:146.0 96:602.0 98:405.0 103:1131.0 104:363.0 105:356.0 106:265.0 107:401.0 109:152.0 110:8071.0 111:4985.0 112:1416.0 114:1107.0 115:613.0 116:934.0 119:563.0 122:85.0 123:124.0 124:95.0 125:183.0 127:1938.0 128:449.0 129:8901.0 130:3350.0 131:2561.0 132:859.0 133:3029.0 137:227.0 141:92.0 142:1635.0 143:14179.0 144:1950.0 145:1560.0 147:15998.0 148:2835.0 149:2500…				648	636	855	632	734	88	599	121	908	420	891	135	848	1373	865	105	1225	920	137	870	180	619	1044	638	585	702	750	604	93	558	687	1042	1008	769	990	875	1075	160	831	792
161843	674080	129	161843	85:1974.0 86:458.0 87:1523.0 88:478.0 89:2570.0 90:298.0 91:415.0 92:303.0 93:7195.0 94:746.0 95:3791.0 96:1019.0 97:1027.0 98:325.0 99:1470.0 101:4753.0 102:927.0 103:33359.0 104:2866.0 105:2137.0 107:377.0 108:210.0 109:2412.0 110:311.0 111:1726.0 112:287.0 113:2297.0 114:396.0 115:2252.0 116:1401.0 117:4893.0 118:980.0 119:1597.0 120:80.0 121:364.0 122:33.0 123:965.0 124:233.0 125:916.0 126:66…				896	879	691	579	621	1176	3473	1714	1184	1359	1243	1130	1551	1132	999	1354	1157	2867	3998	1879	126	739	375	977	1080	476	2294	2398	711	1229	996	625	1416	1352	683	2649	1627	625	3852	2784
161497	896217	361	161497	85:256.0 87:265.0 89:4001.0 90:346.0 97:95.0 99:486.0 101:678.0 103:7582.0 104:663.0 105:76.0 109:380.0 111:748.0 113:386.0 114:177.0 115:132.0 116:622.0 117:2101.0 125:62.0 129:5293.0 130:277.0 131:1591.0 132:254.0 133:4684.0 134:440.0 135:233.0 139:165.0 140:36.0 141:181.0 142:45.0 143:940.0 144:164.0 145:355.0 146:846.0 147:8247.0 148:1150.0 149:884.0 150:24.0 151:106.0 153:227.0 154:15.0 155:…				827	2159	1034	1287	1422	409	365	330	303	571	1831	1823	1792	1775	580	220	280	176	332	485	1313	1206	2088	2288	2747	201	384	797	264	319	1312	1378	2044	1691	1962	564	485	175	356	238
161449	348976	140	161449	86:2447.0 88:227.0 90:599.0 92:97.0 93:283.0 94:58.0 96:127.0 97:409.0 98:36.0 100:300.0 102:2854.0 106:240.0 108:106.0 110:730.0 112:198.0 113:37.0 118:618.0 120:808.0 126:182.0 127:256.0 130:856.0 134:1374.0 140:4788.0 141:247.0 143:146.0 145:81.0 146:2958.0 155:981.0 156:58.0 166:89.0 168:235.0 169:108.0 170:158.0 175:251.0 176:110.0 184:1152.0 185:228.0 199:53.0 213:200.0 214:101.0 251:48.0 2…				289	935	1238	274	1213	150	857	219	818	321	227	161	1055	582	698	289	110	314	431	572	161	346	763	544	557	910	205	305	305	449	664	1266	1440	258	854	262	122	185	210	507
146962	225126	183	146962	89:6510.0 90:526.0 91:1681.0 92:368.0 93:500.0 94:112.0 95:250.0 99:113.0 103:256.0 104:41.0 105:10841.0 106:1126.0 107:2774.0 108:373.0 109:663.0 112:42.0 115:252.0 119:126.0 120:84.0 121:2070.0 122:315.0 123:2214.0 124:155.0 125:261.0 128:248.0 131:388.0 137:2247.0 138:294.0 139:239.0 140:54.0 142:46.0 143:47.0 147:1424.0 148:250.0 152:224.0 153:11312.0 154:937.0 155:474.0 162:44.0 167:229.0 16…				966	861	921	836	989	151	806	128	565	799	667	1023	826	837	954	861	874	484	854	703	993	1062	876	1044	1095	905	529	629	699	712	749	866	544	919	803	868	708	961	833	928
146957	271780	95	146957	91:100.0 93:65.0 94:2654.0 95:4712.0 96:391.0 97:31.0 108:411.0 110:35.0 114:27.0 119:108.0 122:466.0 123:36.0 132:55.0 171:42.0 185:27.0 214:19.0 234:38.0 236:15.0 241:14.0 256:12.0 273:12.0 303:16.0 308:14.0 317:14.0 352:18.0 354:16.0 368:12.0 412:12.0 415:18.0 426:14.0 445:22.0 454:14.0 464:12.0 487:20.0 489:16.0 490:14.0 499:12.0 500:17.0				2633	2386	2399	2814	2939	2849	2682	2676	2499	2792	1701	2952	1187	2692	2489	2639	2690	3208	2542	2940	2699	2808	2531	2714	3067	2981	2670	2786	2721	3120	2662	2477	3145	3079	1719	2501	2919	2877	3061	2638
146674	605383	260	146674	85:1635.0 87:3170.0 88:1220.0 89:5424.0 90:238.0 96:547.0 97:2048.0 98:841.0 99:2132.0 100:3057.0 101:7198.0 102:1295.0 103:19100.0 104:1847.0 105:2007.0 106:513.0 109:264.0 111:45.0 112:1545.0 113:2541.0 114:1362.0 115:6190.0 116:17122.0 117:41587.0 118:5183.0 119:2011.0 121:161.0 127:301.0 129:5025.0 130:696.0 131:10187.0 132:2733.0 133:24216.0 134:4091.0 135:2086.0 136:142.0 140:240.0 141:1644…				302	824	1016	718	607	272	1077	1315	437	984	934	1267	1387	856	287	267	1074	955	492	720	269	551	915	1685	2439	618	1015	1143	367	1410	802	744	1061	475	1254	1730	1827	434	1846	1235
146570	1005451	249	146570	85:1027.0 88:1510.0 89:3440.0 90:274.0 94:235.0 99:729.0 101:7286.0 102:2113.0 103:2999.0 104:425.0 105:100.0 107:383.0 108:210.0 113:247.0 115:1152.0 116:4366.0 117:6942.0 118:1273.0 119:1017.0 120:215.0 123:414.0 125:299.0 127:979.0 129:3170.0 130:606.0 131:2508.0 132:86.0 133:4578.0 134:562.0 137:553.0 138:240.0 139:353.0 140:280.0 142:160.0 143:3321.0 144:1505.0 145:7611.0 146:1064.0 147:1781…				1528	1606	2805	1889	1539	1257	2654	2329	1256	2070	2870	3156	2883	3159	1994	531	1359	1497	1817	1762	3005	2798	2411	1597	3989	1577	2429	2720	1634	2094	3522	1717	3387	3083	3349	1707	2206	1089	1027	1840
146435	1152163	343	146435	85:312.0 86:168.0 87:332.0 88:187.0 89:1126.0 90:209.0 91:8324.0 92:1592.0 93:5314.0 94:892.0 95:5988.0 96:735.0 97:1804.0 98:953.0 99:326.0 101:1350.0 102:380.0 103:936.0 104:95.0 105:6933.0 106:1276.0 107:5480.0 108:792.0 109:2587.0 110:380.0 111:414.0 113:178.0 114:78.0 115:1465.0 116:746.0 117:3407.0 118:993.0 119:4641.0 120:1071.0 121:2569.0 122:810.0 123:1093.0 124:161.0 125:120.0 127:621.0…				662	625	434	372	692	428	505	644	437	466	560	728	619	518	494	555	608	420	432	415	856	574	705	706	348	365	506	683	454	503	603	631	372	645	532	705	409	491	413	284
135260	564758	275	135260	85:490.0 87:328.0 88:96.0 89:4491.0 91:278.0 98:198.0 100:1674.0 101:923.0 102:806.0 105:121.0 107:78.0 109:62.0 111:97.0 112:244.0 113:345.0 114:322.0 115:427.0 116:503.0 117:1642.0 118:320.0 119:231.0 127:529.0 128:1646.0 130:631.0 132:26.0 133:1406.0 139:61.0 140:42.0 141:85.0 142:651.0 144:775.0 145:466.0 146:345.0 147:1531.0 149:269.0 150:93.0 151:42.0 153:152.0 154:140.0 155:2147.0 156:1295…				330	475	527	453	474	318	984	637	451	565	550	667	633	729	504	341	388	495	486	893	541	398	573	870	1049	436	221	918	541	991	505	314	213	830	543	644	708	395	954	789
135253	624137	219	135253	85:2124.0 86:341.0 87:376.0 88:475.0 89:9247.0 90:561.0 91:624.0 93:51.0 94:81.0 96:79.0 97:156.0 98:146.0 99:81.0 100:1157.0 101:1161.0 102:797.0 103:11492.0 104:1084.0 105:1326.0 106:137.0 108:103.0 109:47.0 110:165.0 111:89.0 112:88.0 113:562.0 114:1039.0 115:320.0 116:4449.0 117:2953.0 118:484.0 119:850.0 120:112.0 121:89.0 124:19.0 126:67.0 129:801.0 130:866.0 131:13202.0 132:1673.0 133:6729…				404	1296	730	486	905	901	1655	1280	839	1441	1520	1554	2752	1794	2239	1160	1755	1601	5124	1461	1407	1364	1722	1766	1447	996	1975	877	1331	1323	1838	1465	1799	938	1827	1434	1563	878	2708	2950
133434	361974	140	133434	85:312.0 87:117.0 88:136.0 93:226.0 95:79.0 104:420.0 105:932.0 106:148.0 107:304.0 108:28.0 118:113.0 119:131.0 125:37.0 129:126.0 131:312.0 137:35.0 140:3503.0 141:213.0 144:397.0 155:126.0 156:83.0 162:32.0 163:29.0 174:956.0 175:38.0 176:68.0 177:26.0 178:40.0 180:36.0 181:43.0 186:30.0 190:31.0 191:125.0 204:38.0 206:26.0 207:199.0 221:103.0 222:40.0 230:72.0 231:20.0 234:23.0 235:22.0 237:3…				623	1358	784	1294	765	633	2853	1505	688	1294	683	524	1338	805	880	473	292	425	728	868	1047	571	741	1449	1712	776	1005	1683	618	1702	788	730	886	792	965	625	519	360	781	1200
131620	293525	87	131620	85:239.0 87:10326.0 88:1615.0 91:133.0 93:68.0 95:540.0 96:1011.0 97:268.0 107:699.0 108:80.0 113:291.0 114:325.0 115:151.0 118:48.0 123:60.0 124:331.0 125:1007.0 128:66.0 131:781.0 134:176.0 137:22.0 139:25.0 140:28.0 141:104.0 144:25.0 146:305.0 174:28.0 182:19.0 185:28.0 186:64.0 188:33.0 190:51.0 200:34.0 222:28.0 226:20.0 232:20.0 284:20.0 335:14.0 358:19.0 376:21.0 393:15.0 401:25.0 417:22.…				40432	37200	38593	40233	42211	40830	38281	38487	37506	38136	36936	39258	38028	39121	37503	40544	36691	34724	37983	38555	37494	39656	36187	39626	41767	39085	39407	38265	39615	39438	37151	37854	41863	37979	36353	35830	38884	39798	37513	36583
131202	957189	195	131202	85:302.0 86:82.0 87:159.0 89:529.0 90:97.0 91:61.0 92:538.0 93:130.0 95:147.0 96:104.0 99:261.0 101:482.0 102:88.0 103:3090.0 104:407.0 105:260.0 106:57.0 109:292.0 110:47.0 111:181.0 113:207.0 115:213.0 116:249.0 117:947.0 118:137.0 119:211.0 120:173.0 121:1011.0 122:409.0 123:43.0 124:7.0 129:2660.0 130:284.0 131:910.0 133:1206.0 134:178.0 135:65.0 136:71.0 137:64.0 138:18.0 139:145.0 141:37.0 …				177	160	158	173	178	257	380	335	196	194	232	315	261	283	294	260	308	341	313	460	174	199	102	233	221	230	363	125	236	258	211	192	193	128	185	447	456	175	423	353
130717	502102	116	130717	85:477.0 86:620.0 88:187.0 89:159.0 91:259.0 92:78.0 93:86.0 95:49.0 96:171.0 97:71.0 99:127.0 100:16.0 101:251.0 103:251.0 104:259.0 108:17.0 114:165.0 116:3897.0 117:615.0 120:164.0 124:26.0 129:120.0 130:234.0 131:80.0 132:115.0 133:395.0 134:47.0 136:23.0 140:87.0 141:40.0 144:66.0 147:197.0 149:262.0 152:983.0 153:95.0 156:350.0 157:26.0 158:224.0 159:29.0 160:198.0 161:184.0 162:43.0 163:22…				1103	1946	2258	986	2294	293	1139	526	1299	1007	1287	682	2596	2910	1498	1327	1446	842	739	1023	962	877	2502	1498	1275	1496	1266	886	1524	1054	791	1390	2698	605	639	645	1015	925	705	1332
130396	325318	278	130396	86:3909.0 89:5546.0 91:162.0 98:928.0 100:9202.0 103:3112.0 104:804.0 105:1118.0 109:43.0 115:2742.0 116:1447.0 117:1902.0 118:782.0 119:6979.0 120:481.0 121:178.0 123:62.0 131:6529.0 133:21267.0 134:4246.0 135:2007.0 144:446.0 145:185.0 147:31804.0 152:25.0 160:14456.0 161:3001.0 162:1040.0 163:900.0 169:62.0 188:1604.0 196:22.0 205:1022.0 206:398.0 207:1225.0 208:224.0 213:39.0 215:46.0 221:679…				3299	3104	2287	2937	3183	424	2747	310	2333	2711	1907	428	2159	1783	2115	281	2039	1805	432	1828	285	2225	2399	2062	2552	3421	2355	2534	252	2950	1598	3074	2093	1021	1943	1518	1335	456	2402	1899
129848	974993	307	129848	85:6603.0 86:1281.0 87:3004.0 88:3840.0 89:10442.0 90:871.0 91:2794.0 92:625.0 93:708.0 94:204.0 95:507.0 96:131.0 97:641.0 98:644.0 99:2860.0 100:775.0 101:11666.0 102:3488.0 103:4326.0 104:1309.0 105:4308.0 106:401.0 107:1096.0 108:368.0 109:1202.0 110:317.0 111:497.0 112:71.0 113:1839.0 114:678.0 115:13183.0 116:3195.0 117:22275.0 118:2171.0 119:4295.0 120:671.0 121:1389.0 122:230.0 123:104.0 …				99	132	169	87	335	1609	1641	2579	2793	2210	172	1448	140	670	2720	2390	6280	7513	4779	4565	153	174	101	145	133	1746	4591	4338	2284	3025	137	182	203	840	211	6972	6506	4359	6791	3745
129846	611050	293	129846	85:2965.0 87:3304.0 88:6552.0 89:20820.0 90:8433.0 91:14349.0 92:3492.0 93:1889.0 94:235.0 95:1181.0 96:715.0 97:485.0 98:779.0 99:3379.0 101:13418.0 102:13544.0 103:5050.0 104:454.0 105:8441.0 106:973.0 107:2508.0 108:69.0 109:1305.0 110:172.0 112:121.0 113:1211.0 114:788.0 115:28260.0 116:7553.0 117:6410.0 118:8666.0 119:6553.0 120:1863.0 121:4964.0 122:988.0 123:841.0 124:840.0 125:1341.0 126:…				6031	7999	5621	4472	7096	10362	25142	20418	4569	10882	10050	3617	15815	9132	16231	5737	1736	3767	26426	15778	7611	7032	12289	4544	14588	9478	13413	20469	8833	20526	8645	6005	16990	14771	11227	8247	10981	1767	15958	24630
126345	317630	112	126345	96:18.0 98:4.0 106:5.0 107:2.0 112:1405.0 113:81.0 127:5.0 128:9.0 129:35.0 130:3.0 145:5.0 158:310.0 159:6.0 164:3.0 169:1.0 173:7.0 182:3.0 207:2.0 210:3.0 214:33.0 215:4.0 226:2.0 243:4.0 257:5.0 271:4.0 272:4.0 284:2.0 288:2.0 297:3.0 299:2.0 303:2.0 308:1.0 324:1.0 326:3.0 328:2.0 329:6.0 342:3.0 357:6.0 367:4.0 375:9.0 379:2.0 391:2.0 399:1.0 400:1.0 401:8.0 402:1.0 405:2.0 413:5.0 415:2.0 …				2389	1926	1670	2530	2394	909	2442	1047	1659	2310	2340	2397	2181	2104	2034	2550	2085	2032	2175	2232	2331	2387	1995	2467	2469	2276	2763	1975	2708	2529	2231	1914	2504	2316	2050	2167	2478	2271	2404	2292
125811	989235	204	125811	86:169.0 89:110.0 91:79.0 92:53.0 100:89.0 101:436.0 103:851.0 105:108.0 106:97.0 107:79.0 108:31.0 109:90.0 111:45.0 113:39.0 115:78.0 116:369.0 117:800.0 118:145.0 119:555.0 126:52.0 128:25.0 129:1863.0 130:191.0 132:172.0 133:430.0 134:34.0 139:25.0 140:16.0 141:17.0 143:144.0 144:45.0 145:126.0 146:23.0 147:1031.0 148:416.0 155:119.0 157:257.0 159:47.0 161:282.0 166:37.0 167:64.0 171:134.0 17…				269	420	469	510	419	548	1115	1104	759	984	530	549	534	496	995	420	935	1005	617	823	515	364	469	518	797	870	985	1250	662	812	476	611	627	607	570	566	678	520	721	862
125784	935579	361	125784	85:3522.0 86:809.0 87:4108.0 88:1090.0 89:9099.0 90:1025.0 91:6047.0 92:1727.0 93:9767.0 94:1870.0 95:3182.0 96:5368.0 97:3207.0 98:920.0 99:4108.0 100:605.0 101:15243.0 102:2921.0 103:95805.0 104:10140.0 105:12625.0 106:1226.0 107:1083.0 108:281.0 109:9985.0 110:749.0 111:5252.0 112:682.0 113:8744.0 114:1092.0 115:4289.0 116:10580.0 117:30929.0 118:3654.0 119:5025.0 120:624.0 121:5170.0 122:631.…				170	256	497	337	338	178	387	578	254	515	463	478	499	513	414	635	520	584	654	723	212	251	492	1662	710	373	575	680	359	735	520	312	536	643	444	673	651	270	472	351
124976	966058	205	124976	85:378.0 86:23.0 87:285.0 88:216.0 89:1012.0 90:153.0 91:146.0 92:68.0 94:40.0 95:55.0 96:43.0 97:252.0 98:91.0 99:270.0 100:86.0 101:838.0 102:170.0 103:9518.0 104:657.0 105:309.0 106:15.0 107:58.0 108:35.0 109:99.0 110:36.0 111:338.0 112:85.0 113:282.0 114:59.0 115:318.0 116:298.0 117:6648.0 118:645.0 119:371.0 120:76.0 121:51.0 122:39.0 123:59.0 124:59.0 125:86.0 126:70.0 127:96.0 128:53.0 129…				330	305	446	265	329	82	88	128	149	155	675	770	743	714	99	155	70	157	175	143	447	625	508	675	383	104	140	216	93	144	618	550	1018	425	831	288	161	146	96	142
124615	407752	101	124615	85:512.0 86:257.0 87:2254.0 88:312.0 89:518.0 95:47.0 97:112.0 99:576.0 100:192.0 101:6380.0 102:2553.0 103:3777.0 104:396.0 105:200.0 110:248.0 111:98.0 113:391.0 115:472.0 116:2892.0 117:806.0 118:158.0 120:43.0 129:1007.0 130:1010.0 131:2723.0 132:683.0 133:1516.0 134:305.0 135:156.0 143:119.0 144:61.0 146:21.0 147:19696.0 148:3122.0 149:1255.0 150:37.0 157:218.0 159:34.0 163:60.0 172:40.0 175…				4813	18227	2400	13173	12224	11412	26330	21527	10440	12081	15130	25974	21818	15921	13291	1282	23972	20499	23978	13377	11180	12593	12930	22177	7486	15882	17988	25374	13056	1717	4257	16047	25969	28093	7912	17806	22970	13113	19996	26384
124568	475457	174	124568	86:4751.0 87:258.0 88:135.0 89:1192.0 90:74.0 91:71.0 97:84.0 101:194.0 102:469.0 103:513.0 108:24.0 112:770.0 113:202.0 114:546.0 116:288.0 117:86.0 119:69.0 122:43.0 126:138.0 130:978.0 131:140.0 132:352.0 141:929.0 144:254.0 146:239.0 154:26.0 155:135.0 160:79.0 172:183.0 173:54.0 174:7245.0 175:1252.0 176:504.0 177:18.0 184:32.0 186:379.0 187:61.0 200:443.0 201:122.0 213:10.0 227:153.0 228:23…				134	1678	132	410	342	207	3104	1392	170	715	122	134	646	260	343	134	124	136	234	246	626	168	631	1396	3510	243	334	1164	173	2438	170	165	447	216	303	169	175	88	109	385
122191	286291	187	122191	85:1365.0 86:1735.0 87:501.0 88:1264.0 89:1213.0 90:270.0 91:407.0 93:794.0 95:6639.0 96:513.0 97:544.0 99:1392.0 100:205.0 101:2510.0 102:402.0 105:3672.0 106:267.0 110:94.0 111:372.0 112:646.0 113:431.0 115:387.0 116:4334.0 117:46601.0 118:4453.0 119:1949.0 120:107.0 123:19.0 125:39.0 128:247.0 129:13878.0 131:16378.0 132:12189.0 133:2234.0 134:518.0 141:100.0 143:2895.0 144:360.0 145:3226.0 14…				364	249	1692	911	619	559	473	348	670	478	512	1028	426	600	577	442	456	253	946	718	398	594	309	278	1265	350	633	819	747	677	657	976	438	1044	1530	640	538	1184	743	612
120564	355121	127	120564	91:104.0 95:98.0 96:567.0 97:641.0 99:5329.0 126:602.0 127:20911.0 128:1447.0 129:105.0 134:172.0 138:38.0 139:73.0 140:336.0 145:31.0 149:162.0 152:32.0 153:205.0 168:14.0 181:76.0 182:14.0 187:17.0 188:24.0 210:29.0 243:42.0 246:32.0 257:17.0 261:21.0 267:38.0 270:14.0 271:33.0 279:23.0 290:22.0 307:28.0 392:26.0 402:18.0 407:20.0 415:27.0 455:24.0 461:29.0 464:29.0 474:31.0 478:20.0				3982	1830	3402	3462	3735	3604	3467	3184	2951	3902	3491	3218	3393	3343	3879	3458	3245	3743	2063	3750	3029	3383	3796	3589	3798	3454	4016	3709	3386	3465	3431	2619	3724	3395	3253	2932	3521	3494	3641	3122
120562	475084	98	120562	98:6741.0 100:212.0 101:112.0 102:564.0 103:798.0 104:118.0 114:18.0 115:31.0 117:125.0 125:62.0 126:139.0 129:186.0 130:232.0 143:65.0 144:151.0 147:222.0 154:45.0 170:105.0 171:760.0 172:143.0 173:85.0 178:18.0 185:41.0 187:151.0 195:21.0 200:1249.0 201:189.0 208:36.0 213:37.0 215:54.0 217:52.0 224:22.0 225:32.0 228:32.0 230:27.0 231:23.0 236:30.0 238:16.0 248:43.0 250:19.0 252:18.0 258:33.0 26…				2017	2198	966	3641	1517	2014	5718	4867	557	4236	2372	1933	2033	1300	1344	1218	762	1059	1521	2840	3112	2843	1415	6245	11374	2411	3961	6835	2989	8686	2009	924	1185	2677	1193	1973	2662	807	2884	1978
120526	294844	99	120526	85:65.0 87:130.0 89:44.0 93:21.0 96:102.0 97:37.0 98:194.0 99:5515.0 100:238.0 104:29.0 107:175.0 110:24.0 113:43.0 118:28.0 121:61.0 131:104.0 149:39.0 171:80.0 178:31.0 180:22.0 182:25.0 190:26.0 265:29.0 362:19.0 384:23.0 396:21.0 433:30.0 436:17.0 438:19.0 445:28.0 447:18.0 468:25.0 470:22.0 472:20.0 476:37.0 478:22.0 482:16.0				2009	2609	1888	1857	2359	469	3024	1086	1942	2046	1488	594	2236	1634	1859	492	1131	846	698	1435	912	1447	2033	2539	2753	2033	1799	2470	745	2015	1791	2007	2087	1721	1960	1168	1075	531	1404	1634
119066	740885	117	119066	85:299.0 86:105.0 87:57.0 89:281.0 90:48.0 93:175.0 94:43.0 95:592.0 97:483.0 98:301.0 99:201.0 101:67.0 102:27.0 105:209.0 107:153.0 109:132.0 110:51.0 111:263.0 112:37.0 113:31.0 116:455.0 117:8282.0 118:603.0 119:260.0 121:83.0 123:134.0 124:36.0 125:42.0 129:3583.0 130:425.0 131:1100.0 132:2893.0 133:622.0 134:157.0 135:91.0 136:40.0 138:24.0 143:160.0 144:22.0 145:1892.0 146:216.0 159:133.0 …				420	1145	1193	896	904	523	4077	1570	801	1269	1650	2253	2554	1384	1293	964	1100	1603	2115	1587	846	1041	1530	1697	1482	1041	1814	1729	1131	2435	1328	1159	1758	2190	1603	1430	1687	664	3576	2299
117043	656983	188	117043	85:2193.0 86:3151.0 87:1274.0 88:358.0 89:2301.0 90:408.0 92:195.0 93:107.0 94:59.0 95:122.0 98:771.0 99:3431.0 100:33378.0 101:3876.0 102:1836.0 103:1844.0 104:405.0 105:497.0 107:179.0 109:54.0 111:249.0 112:163.0 113:615.0 114:1094.0 115:2020.0 116:3679.0 117:2091.0 118:467.0 119:532.0 120:58.0 121:118.0 122:66.0 123:33.0 124:79.0 125:122.0 126:234.0 127:1509.0 128:342.0 129:579.0 130:4724.0 1…				209	197	325	156	158	227	1290	636	377	421	390	641	511	666	603	380	739	984	1124	999	178	317	299	320	151	291	995	1103	493	743	458	369	540	537	415	1098	1005	481	1731	878
115913	425516	116	115913	85:219.0 87:540.0 88:54.0 89:544.0 93:64.0 97:375.0 99:356.0 101:9907.0 102:891.0 103:1694.0 104:228.0 105:245.0 108:62.0 109:68.0 111:172.0 113:208.0 114:47.0 115:1140.0 116:6589.0 117:1727.0 118:330.0 119:317.0 127:213.0 129:378.0 130:429.0 131:794.0 132:87.0 133:2175.0 135:145.0 141:72.0 143:959.0 144:155.0 145:4084.0 146:417.0 147:8501.0 148:1377.0 149:1024.0 150:94.0 157:49.0 163:235.0 164:3…				710	1514	1391	1437	1372	885	2688	2426	1017	2814	1810	1855	2437	2017	1423	659	1654	1973	1476	2476	969	1361	1479	1970	2718	1439	2080	2374	1423	2824	1145	1403	1825	1537	1654	3071	2819	1207	3139	2251
114501	381827	196	114501	86:1924.0 89:386.0 92:446.0 93:1242.0 94:837.0 95:9352.0 96:1191.0 99:470.0 100:8398.0 108:121.0 109:184.0 113:68.0 121:90.0 122:3052.0 123:360.0 124:257.0 125:3107.0 126:445.0 127:431.0 128:129.0 131:266.0 134:64.0 140:104.0 152:419.0 153:95.0 163:27.0 165:25.0 167:58.0 168:73.0 169:252.0 170:27.0 173:60.0 178:34.0 180:452.0 181:188.0 182:90.0 189:42.0 195:163.0 196:50828.0 197:7532.0 198:1812.0…				1498	1204	1611	1210	1519	811	1332	669	1692	1702	2323	1353	2547	2495	2213	388	2428	2008	1057	2165	1031	2134	2001	1945	1953	1711	1994	2154	887	1806	1975	2107	2382	2027	2198	2115	2285	969	2038	1833
112264	385239	183	112264	85:1756.0 86:3785.0 87:724.0 88:526.0 90:132.0 91:143.0 92:82.0 94:46.0 95:95.0 97:736.0 100:708.0 101:312.0 102:704.0 103:330.0 105:28.0 107:142.0 108:68.0 109:79.0 110:441.0 112:120.0 113:1185.0 114:477.0 115:352.0 118:388.0 124:29.0 125:28.0 129:122.0 130:214.0 133:437.0 134:3107.0 135:549.0 136:115.0 138:102.0 139:18.0 140:270.0 142:50.0 143:254.0 144:82.0 145:85.0 146:95.0 147:1255.0 153:71.…				15873	86647	26979	50912	37498	23395	120149	89504	18364	59970	22147	11730	51453	38701	45885	14220	7164	7321	31384	37611	59330	31533	52515	70652	114941	32003	38348	90695	23343	89320	23932	20509	48843	36135	41194	15109	16371	7597	20719	48848
111830	211333	115	111830	91:10.0 97:66.0 101:125.0 115:15295.0 116:1066.0 117:667.0 127:127.0 131:5024.0 132:235.0 133:41.0 173:2175.0				1796	1133	1725	1798	1763	1136	1239	1243	1453	1493	1273	1368	1275	1247	1135	1228	1928	1375	1550	1588	1307	1419	1372	1442	1596	1401	1378	1316	1491	1606	1342	1493	1728	1793	1632	1449	1607	1681	1625	1364
111821	604502	89	111821	85:386.0 86:410.0 87:305.0 88:244.0 89:14747.0 90:903.0 91:538.0 94:49.0 96:404.0 97:65.0 98:290.0 99:229.0 100:909.0 101:3156.0 102:438.0 103:2942.0 104:233.0 105:852.0 106:124.0 107:123.0 108:50.0 110:545.0 111:102.0 112:236.0 113:213.0 114:442.0 115:513.0 116:1166.0 117:2440.0 118:189.0 119:395.0 120:59.0 121:77.0 122:41.0 123:41.0 124:83.0 126:813.0 128:322.0 129:2257.0 130:376.0 131:1298.0 1…				4550	5435	7978	4241	5762	1851	9936	9005	4501	7425	9856	12023	9480	5855	7470	2308	9589	9990	5384	10135	6359	6870	9408	6181	12585	4671	9453	9871	6594	10260	7652	8854	13433	12272	10897	8935	13224	4611	5261	6798
110889	423283	140	110889	86:56.0 87:520.0 90:4760.0 91:556.0 93:109.0 95:101.0 96:141.0 97:2680.0 101:5.0 103:504.0 104:56.0 106:74.0 107:91.0 108:285.0 110:6264.0 111:233.0 112:2455.0 114:101.0 115:558.0 116:121.0 117:169.0 119:102.0 123:24.0 128:559.0 129:133.0 134:281.0 135:168.0 136:46.0 140:37991.0 141:8440.0 142:1809.0 144:112.0 146:24.0 156:48.0 164:18.0 165:24.0 171:460.0 172:549.0 174:23.0 178:30.0 184:242.0 186…				607	975	1293	898	1719	524	1464	934	1361	984	876	1043	1084	564	490	277	1156	1139	512	1074	760	976	648	957	875	1795	650	941	999	1205	828	1361	169	1140	244	1262	823	1052	938	1148
109997	618393	103	109997	85:119.0 86:349.0 89:1222.0 90:76.0 100:280.0 101:104.0 102:80.0 103:8158.0 104:549.0 105:491.0 113:394.0 117:683.0 127:257.0 129:550.0 131:291.0 133:885.0 134:123.0 145:60.0 147:2913.0 148:202.0 149:135.0 157:92.0 163:81.0 189:357.0 190:58.0 191:44.0 205:161.0 206:30.0 217:2269.0 218:360.0 219:114.0 230:32.0 231:47.0 232:13.0 233:18.0 241:13.0 256:12.0 257:24.0 267:12.0 277:101.0 287:18.0 307:43…				3520	5147	2536	1466	2041	12588	5130	5739	10644	6370	3475	3529	7881	3234	14476	32867	6690	14078	77631	17196	2274	2915	3236	2876	2413	5372	11265	5993	7066	4860	7978	4511	4262	4211	1580	11688	6581	9191	24812	28127
108950	876994	204	108950	85:214.0 87:142.0 88:147.0 89:589.0 90:52.0 91:181.0 92:102.0 93:58.0 94:143.0 95:164.0 96:203.0 97:217.0 98:172.0 99:271.0 100:224.0 101:704.0 102:260.0 103:2184.0 104:278.0 106:88.0 107:26.0 108:122.0 109:180.0 110:60.0 111:128.0 112:301.0 113:176.0 114:44.0 115:293.0 116:433.0 117:1397.0 118:194.0 119:274.0 120:126.0 121:62.0 122:91.0 123:60.0 124:178.0 125:17.0 126:118.0 127:255.0 128:212.0 1…				882	1710	1759	988	1926	1026	1215	2492	1751	1537	1973	3095	1870	2445	1860	1425	3794	4810	2902	3096	2994	1234	1390	1947	1809	1145	2795	2568	1666	2317	2111	217	2154	2871	2807	4272	3969	2086	3893	2733
107143	278729	174	107143	85:3536.0 86:26978.0 87:2984.0 88:4947.0 89:1049.0 90:475.0 91:3168.0 92:165.0 93:749.0 94:51.0 95:709.0 96:1202.0 98:129.0 99:496.0 100:15604.0 101:2397.0 102:1417.0 103:25.0 104:1350.0 105:494.0 106:1060.0 107:26334.0 108:1429.0 109:877.0 110:7529.0 111:370.0 112:100.0 113:533.0 114:777.0 115:758.0 116:1304.0 117:1936.0 118:3471.0 119:727.0 120:566.0 123:110.0 125:111.0 126:1559.0 127:4881.0 12…				1227	1477	1601	1186	1310	3807	3064	3684	2460	888	3907	1485	2502	2302	4842	1992	12237	8017	4746	6860	575	2653	1467	1539	2753	4422	7460	15557	4815	5672	1847	2342	2405	5711	1979	3690	9941	3862	11107	6323
107070	260468	134	107070	85:640.0 86:7272.0 87:1787.0 88:4477.0 89:1247.0 90:727.0 91:3234.0 92:449.0 93:930.0 94:72.0 95:2164.0 96:2061.0 97:15747.0 98:2997.0 99:151.0 100:2441.0 101:519.0 102:17.0 103:401.0 104:1238.0 105:971.0 106:1910.0 107:31536.0 108:2241.0 109:1503.0 110:12769.0 111:2405.0 112:274.0 113:156.0 114:134.0 115:460.0 118:3727.0 119:549.0 120:355.0 122:8.0 123:643.0 124:14.0 125:96.0 126:2212.0 127:5384…				17804	36566	57094	2514	57182	39380	53510	56061	53405	62330	52497	110845	11762	64851	57410	28272	54171	60975	36796	62997	48072	40513	63681	41083	39112	48277	41640	42016	53333	79013	57602	55983	75513	109206	47291	18304	60845	42916	48570	51978
106936	238992	244	106936	89:281.0 90:73.0 91:107.0 94:27.0 96:263.0 97:321.0 98:50.0 100:123.0 103:295.0 104:168.0 105:568.0 106:201.0 107:219.0 115:502.0 116:128.0 117:135.0 119:277.0 120:233.0 121:220.0 124:360.0 126:387.0 133:1266.0 134:130.0 135:434.0 136:99.0 137:370.0 138:21.0 147:304.0 149:328.0 151:3191.0 152:1361.0 153:386.0 154:35.0 155:71.0 163:41.0 174:105.0 176:31.0 177:122.0 178:243.0 179:98.0 193:51.0 194:…				698	755	507	801	518	797	984	1057	567	688	582	288	470	496	389	290	451	470	558	447	544	406	512	612	945	657	694	1126	558	1029	418	267	556	580	495	540	493	511	522	184
106482	772969	128	106482	85:1837.0 86:2306.0 87:2099.0 88:5423.0 89:1045.0 90:664.0 91:1108.0 92:224.0 93:379.0 94:143.0 95:300.0 96:314.0 97:448.0 98:1652.0 99:1282.0 100:26445.0 101:5270.0 102:2664.0 103:4984.0 104:630.0 105:1442.0 106:425.0 107:512.0 108:115.0 109:3691.0 110:490.0 111:1768.0 112:1727.0 113:2271.0 114:5293.0 115:4795.0 116:5273.0 117:3748.0 118:1046.0 119:1716.0 120:345.0 121:581.0 122:82.0 123:243.0 1…				289	245	293	435	341	325	227	444	277	377	439	551	318	168	219	296	295	481	552	532	374	293	195	405	404	323	397	714	323	501	516	256	281	538	160	216	598	141	751	693
106475	302194	188	106475	85:717.0 86:2244.0 87:1586.0 88:1440.0 89:15218.0 90:1316.0 91:758.0 93:55.0 94:30.0 95:138.0 96:357.0 97:656.0 98:2681.0 99:678.0 100:3554.0 101:1525.0 102:2050.0 103:2646.0 104:1349.0 105:1668.0 106:319.0 108:158.0 109:38.0 110:57.0 111:64.0 112:112.0 113:635.0 114:1351.0 115:1897.0 116:3975.0 117:2205.0 118:958.0 119:5949.0 120:743.0 121:531.0 122:75.0 123:65.0 124:31.0 127:214.0 128:531.0 129…				344	407	529	529	557	335	464	412	239	513	509	299	474	557	428	305	232	679	100	564	400	448	510	362	503	250	457	550	275	144	268	246	486	825	423	565	305	113	596	454
106387	825293	204	106387	85:705.0 86:213.0 87:574.0 88:422.0 89:1150.0 90:82.0 92:81.0 93:55.0 95:229.0 97:128.0 98:63.0 99:623.0 101:5694.0 102:870.0 103:22310.0 104:2039.0 105:1028.0 111:409.0 113:352.0 114:43.0 115:924.0 116:2252.0 117:3830.0 118:472.0 119:589.0 120:91.0 123:135.0 125:99.0 127:136.0 128:124.0 129:8186.0 130:1090.0 131:4619.0 132:765.0 133:6261.0 134:861.0 135:639.0 136:35.0 141:298.0 142:251.0 143:421…				2264	3821	4881	2866	2799	6142	18701	15686	8555	15024	5057	8958	7140	5595	17073	5671	14380	25985	14271	13442	3448	2901	4572	5022	4362	7638	11611	23680	6831	15852	5012	5304	7518	6341	5562	12588	15368	9996	19530	18269
105630	969375	204	105630	85:2284.0 86:440.0 87:736.0 88:401.0 89:1245.0 90:84.0 91:94.0 93:36.0 94:128.0 95:161.0 96:177.0 97:626.0 98:168.0 99:1317.0 100:230.0 101:4058.0 102:720.0 103:20758.0 104:1808.0 105:1020.0 109:1501.0 110:82.0 111:1177.0 112:160.0 113:1327.0 115:874.0 116:2022.0 117:4830.0 118:479.0 119:725.0 120:91.0 121:65.0 123:73.0 124:49.0 125:233.0 127:1073.0 128:204.0 129:29604.0 130:3528.0 131:6116.0 132…				245	484	338	306	356	1041	712	903	360	492	539	605	623	682	496	931	696	447	1390	714	781	347	487	676	700	416	416	721	1119	653	586	518	659	942	532	796	702	620	615	600
105625	556262	100	105625	85:218.0 97:114.0 100:4672.0 101:227.0 102:127.0 109:63.0 117:275.0 118:32.0 119:46.0 126:34.0 129:271.0 131:222.0 132:58.0 133:384.0 135:31.0 138:56.0 147:865.0 152:11.0 153:41.0 154:496.0 156:396.0 157:29.0 168:14.0 171:40.0 172:295.0 174:133.0 175:126.0 177:32.0 190:426.0 191:36.0 199:31.0 207:40.0 217:44.0 225:17.0 228:107.0 230:48.0 243:25.0 244:986.0 245:1083.0 246:283.0 258:149.0 259:34.0 …				399	541	586	456	468	1103	1334	1044	863	978	714	1282	901	738	921	405	1162	1429	1374	1601	444	706	653	765	864	893	1368	1240	897	2298	808	1549	2013	1022	1751	1518	1446	1160	2110	1775
105622	488510	158	105622	85:6971.0 88:1516.0 89:220.0 91:1304.0 95:1125.0 98:2773.0 99:441.0 101:5043.0 102:1533.0 103:1263.0 104:488.0 105:570.0 107:294.0 109:1077.0 110:660.0 111:965.0 113:1798.0 116:3584.0 117:2288.0 118:1046.0 121:556.0 122:105.0 123:241.0 124:347.0 125:160.0 128:558.0 129:2591.0 131:1804.0 132:642.0 133:1688.0 134:1786.0 135:188.0 136:556.0 137:445.0 138:376.0 139:132.0 140:4308.0 141:1093.0 144:702…				5339	21411	19228	5316	22369	7039	29879	7048	11532	8511	11160	10200	14642	34967	31580	9602	17403	7176	2445	6501	8987	5624	30767	14957	11738	13900	9106	9799	14085	7461	5749	17494	32171	6978	17977	9245	19963	8642	11265	13019
105082	875812	219	105082	85:301.0 87:382.0 88:935.0 89:1269.0 90:397.0 91:638.0 92:84.0 94:69.0 99:165.0 101:2228.0 102:1152.0 103:1911.0 104:297.0 115:1474.0 116:522.0 117:4436.0 118:693.0 119:589.0 120:83.0 121:110.0 122:86.0 129:1473.0 130:411.0 131:962.0 132:165.0 133:2226.0 134:195.0 135:841.0 136:115.0 137:73.0 139:82.0 145:483.0 146:349.0 147:7634.0 148:1044.0 149:903.0 150:262.0 151:196.0 153:121.0 154:23.0 159:8…				28041	24599	53203	27194	29132	33687	36913	52378	64797	51010	62053	107011	48927	58630	57014	45595	129264	166109	95661	96662	26536	36263	40710	44066	45218	35783	93416	86087	58921	75150	70639	72286	68107	82523	59822	139761	128756	65641	136907	86447
103102	373630	117	103102	85:170.0 86:454.0 87:71.0 88:270.0 89:233.0 91:379.0 93:134.0 94:39.0 95:611.0 96:448.0 101:493.0 105:429.0 106:76.0 107:758.0 108:38.0 113:39.0 115:182.0 116:906.0 117:16696.0 118:1334.0 119:552.0 124:148.0 125:28.0 128:33.0 129:4186.0 130:401.0 131:4101.0 132:2979.0 133:842.0 143:19.0 145:3295.0 146:466.0 147:86.0 150:17.0 155:313.0 157:275.0 168:42.0 169:27.0 172:63.0 199:6183.0 200:657.0 201:…				21596	19541	19986	22038	21603	20621	18611	18806	17399	17752	19846	20562	17398	17289	19611	20157	19383	18142	20873	18962	19900	21605	19917	18742	21299	20523	21719	16313	18726	21531	19809	19490	20335	20862	20123	19363	20028	20572	21312	17471
102616	280925	171	102616	85:708.0 86:3265.0 87:418.0 88:815.0 90:219.0 94:35.0 95:167.0 97:274.0 98:60.0 99:279.0 101:393.0 102:77.0 103:1767.0 104:272.0 105:289.0 109:35.0 110:118.0 111:151.0 112:53.0 113:717.0 114:98.0 115:257.0 116:105.0 118:91.0 125:270.0 128:65.0 129:595.0 130:294.0 131:153.0 134:336.0 140:401.0 141:291.0 142:75.0 143:128.0 144:17.0 146:151.0 155:110.0 156:233.0 157:53.0 161:23.0 167:121.0 170:162.0…				1009	1058	1083	924	1255	718	990	1216	832	1026	1227	1058	1280	1304	1199	859	1083	1050	1008	1418	409	967	1192	1082	1162	990	1148	900	1176	1160	1148	1059	964	1069	1004	1085	1423	911	1132	1069
100906	901689	219	100906	87:48.0 88:172.0 89:469.0 90:88.0 91:94.0 92:29.0 96:36.0 98:53.0 99:44.0 101:297.0 102:409.0 103:1189.0 104:110.0 105:68.0 107:69.0 108:31.0 110:53.0 111:33.0 113:66.0 115:222.0 116:149.0 117:389.0 119:113.0 122:17.0 127:165.0 128:49.0 129:682.0 131:298.0 133:377.0 134:99.0 135:140.0 136:67.0 143:639.0 144:137.0 145:95.0 147:3173.0 148:561.0 149:235.0 153:28.0 155:59.0 156:25.0 157:56.0 161:105.…				639	520	684	513	540	88	110	92	94	94	1008	855	1174	904	118	137	134	100	95	180	651	614	846	815	835	96	84	125	135	160	1012	974	1041	1158	890	141	208	140	246	132
100897	740728	103	100897	85:390.0 87:338.0 88:85.0 89:2865.0 90:214.0 91:229.0 95:50.0 97:119.0 99:100.0 100:406.0 101:997.0 102:164.0 103:10935.0 104:972.0 105:599.0 110:25.0 111:84.0 113:179.0 114:531.0 115:70.0 116:335.0 117:4097.0 118:433.0 127:149.0 128:55.0 129:3373.0 130:402.0 131:86.0 132:262.0 133:2977.0 134:249.0 135:156.0 139:24.0 141:64.0 142:114.0 145:148.0 147:10569.0 148:1449.0 149:1109.0 154:58.0 157:2018…				1023	2500	1261	1521	317	1240	2394	1711	1535	1484	1556	1598	1772	1562	1124	2291	898	1339	5080	1784	991	1168	1467	1804	1643	1104	1669	1364	1066	1974	961	1235	1276	1382	1858	1054	1765	1522	1897	882
100666	436137	114	100666	87:488.0 88:63.0 94:23.0 98:37.0 99:117.0 101:67.0 104:62.0 106:57.0 110:91.0 112:21.0 114:3221.0 115:206.0 129:33.0 136:27.0 139:62.0 157:26.0 183:38.0 195:19.0 196:16.0 244:16.0 305:16.0 347:16.0 371:13.0 396:30.0 398:20.0 419:13.0 431:16.0 440:14.0 444:16.0 483:22.0				1409	1672	1603	1520	1549	1738	1977	1544	1492	1397	1748	1563	1790	1776	1936	1570	1709	1572	1610	1565	1409	1449	1780	1817	1956	1899	1793	1419	1574	1829	1246	1579	1756	1272	1877	1438	1617	1611	1318	1621
100253	280744	116	100253	85:3704.0 86:23.0 91:262.0 94:16.0 95:86.0 99:147.0 101:3263.0 102:528.0 103:1271.0 105:59.0 107:504.0 110:643.0 115:54.0 116:9303.0 117:683.0 118:619.0 126:132.0 129:30.0 130:7.0 131:2866.0 132:54.0 134:1145.0 136:221.0 140:170.0 142:231.0 143:405.0 144:182.0 145:3544.0 146:451.0 147:10299.0 148:1293.0 149:987.0 151:7.0 152:31.0 171:355.0 174:1.0 177:2022.0 178:225.0 179:135.0 184:759.0 185:12.0…				2440	2136	2295	2246	2519	2476	2389	2305	2102	2309	2326	2351	2256	2235	2276	1806	2593	2470	2374	2508	1992	2394	2220	2212	2440	2055	2796	2660	2223	2656	2234	2322	2346	2315	1991	1904	2626	2411	2395	1465
94724	494545	96	94724	85:143.0 86:84.0 87:208.0 88:66.0 89:11.0 90:6.0 91:10.0 93:6.0 95:33.0 96:1133.0 97:92.0 99:30.0 100:79.0 101:71.0 103:58.0 104:1.0 105:3.0 106:6.0 107:1.0 109:1.0 112:5.0 113:10.0 114:8.0 115:5.0 116:192.0 117:13.0 118:16.0 119:1.0 122:4.0 123:2.0 124:6.0 126:24.0 127:3.0 128:9.0 129:490.0 130:78.0 131:22.0 133:27.0 135:8.0 136:1.0 137:2.0 138:2.0 140:50.0 141:6.0 142:54.0 143:38.0 144:197.0 14…				444	2332	4713	441	2648	661	1093	1458	1940	902	1050	919	1735	3424	4376	430	1585	850	812	769	615	676	3431	1756	1443	1488	782	876	1003	325	765	3155	6313	418	3249	675	1097	757	266	1934
93404	468881	129	93404	85:2213.0 86:604.0 87:89.0 88:49.0 89:155.0 90:55.0 92:16.0 94:7.0 97:40.0 98:632.0 99:560.0 100:234.0 101:195.0 102:388.0 103:1883.0 104:152.0 105:145.0 106:67.0 112:19.0 113:324.0 114:59.0 115:149.0 116:201.0 117:141.0 121:25.0 122:656.0 123:56.0 125:8.0 126:45.0 127:228.0 128:109.0 129:3866.0 130:564.0 131:155.0 132:2.0 133:404.0 134:66.0 135:2.0 137:634.0 138:64.0 139:79.0 140:3.0 141:50.0 14…				440	775	704	690	418	1349	493	2493	1286	165	842	906	900	929	2318	615	728	899	1547	1099	502	491	629	419	451	1584	2149	3141	1659	588	648	1076	764	1140	724	928	1005	343	406	896
88583	298433	131	88583	89:221.0 95:117.0 99:240.0 101:92.0 111:134.0 113:31.0 114:51.0 115:1320.0 116:124.0 117:184.0 128:45.0 130:99.0 131:9476.0 132:1299.0 133:424.0 134:39.0 139:48.0 145:22.0 147:1956.0 148:532.0 149:259.0 155:38.0 157:53.0 162:29.0 165:13.0 177:73.0 187:8.0 219:56.0 236:29.0 244:43.0 245:33.0 246:23.0 332:18.0 446:18.0 455:23.0 458:33.0				1925	1347	1695	1630	1699	1699	1195	1538	1603	1546	1678	1921	1176	1686	1660	1494	1810	1457	2034	1614	1390	1780	1452	1680	1650	1348	1808	1645	1449	1863	1190	1677	1398	1545	1876	1243	1565	1733	1696	1308
87756	243063	91	87756	87:3263.0 88:356.0 89:1339.0 90:189.0 91:7776.0 92:366.0 93:318.0 98:71.0 99:276.0 101:670.0 103:4584.0 104:260.0 105:470.0 110:36.0 112:43.0 113:48.0 116:8757.0 117:2503.0 118:617.0 119:762.0 121:31.0 122:18.0 129:140.0 131:363.0 145:40.0 148:584.0 151:36.0 158:51.0 168:18.0 172:58.0 177:251.0 178:35.0 182:20.0 187:22.0 188:244.0 189:36.0 192:42.0 193:88.0 196:21.0 202:42.0 203:32.0 208:20.0 226…				1037	1441	837	2063	1788	4332	1144	1907	751	1386	2494	1662	437	678	1223	2610	4272	1293	1243	852	1632	884	588	1182	2163	2465	1782	3467	1469	2013	1000	711	2159	1933	1320	646	1741	2119	1167	666
85198	859317	128	85198	87:11.0 88:145.0 89:455.0 90:52.0 97:1.0 98:83.0 100:364.0 101:215.0 102:26.0 103:129.0 105:14.0 114:185.0 128:3207.0 129:474.0 130:246.0 133:75.0 147:152.0 160:852.0 161:110.0 162:37.0 174:53.0 188:45.0 202:118.0 217:251.0 218:102.0 219:264.0 220:5.0 221:8.0 230:28.0 232:66.0 234:4.0 244:108.0 245:38.0 262:27.0 274:80.0 275:7.0 278:337.0 279:75.0 280:8.0				578	559	754	1188	1037	442	897	1271	283	977	704	776	646	762	330	247	288	835	348	924	863	870	673	1709	2050	506	922	897	729	1149	626	344	509	1047	818	258	1059	374	822	703
85133	302726	157	85133	85:963.0 99:231.0 101:138.0 113:1333.0 114:110.0 129:368.0 130:21.0 143:17.0 157:5402.0 158:527.0 159:158.0 172:60.0 250:15.0 402:14.0				943	3549	911	1142	1631	1479	1088	1787	1019	2258	1497	866	3092	1334	1760	2199	729	976	6421	1852	1244	1121	1350	1082	936	1540	1872	939	1454	1513	2879	1474	1428	1693	808	665	1254	810	2076	4525
84915	263247	89	84915	85:207.0 86:3695.0 89:68621.0 90:5267.0 91:3001.0 93:127.0 94:15.0 95:381.0 96:190.0 97:48.0 99:449.0 100:3987.0 102:1415.0 103:1211.0 104:216.0 105:481.0 106:109.0 107:914.0 109:107.0 110:252.0 111:65.0 112:1.0 114:134.0 116:903.0 117:686.0 118:245.0 119:111.0 120:4.0 122:6.0 123:12.0 124:59.0 126:229.0 128:59.0 129:26.0 131:1270.0 132:182.0 133:1746.0 134:1027.0 135:338.0 140:33.0 142:50.0 143:…				9319	16645	12078	12212	17802	11502	37688	36009	14122	23957	14371	30543	40015	24431	26004	9813	21258	23576	26059	17556	28789	24528	13934	53391	41298	19385	59084	17138	21402	19368	19856	18359	33606	17721	40482	24158	31769	17131	56763	34476
84583	631741	156	84583	85:69.0 86:105.0 87:14.0 88:22.0 89:1163.0 90:59.0 97:309.0 98:18.0 99:74.0 100:26.0 101:197.0 102:384.0 112:188.0 113:105.0 115:6.0 116:3.0 117:194.0 123:131.0 127:163.0 128:453.0 129:745.0 130:44.0 131:168.0 133:394.0 135:4.0 138:62.0 140:159.0 141:169.0 143:265.0 144:7.0 145:9.0 146:7.0 147:3013.0 148:594.0 149:127.0 150:52.0 154:12.0 155:74.0 156:4072.0 157:185.0 158:51.0 159:12.0 160:2.0 161…				489	135	798	538	554	370	1063	752	362	482	528	688	207	518	546	461	99	704	945	177	326	327	21	629	646	413	632	623	429	780	504	484	642	680	496	542	897	407	274	289
84293	887445	186	84293	85:635.0 86:1580.0 88:608.0 89:458.0 94:2031.0 95:469.0 96:3085.0 98:603.0 100:355.0 102:996.0 103:8213.0 104:298.0 108:575.0 109:274.0 110:93.0 111:514.0 112:529.0 114:2655.0 115:1334.0 116:1258.0 117:1953.0 122:211.0 123:202.0 124:578.0 125:53.0 127:417.0 128:1632.0 129:4233.0 130:31.0 131:1887.0 132:37.0 133:525.0 134:434.0 136:89.0 137:373.0 139:124.0 140:649.0 142:1899.0 144:755.0 146:130.0 …				1974	1602	1647	1645	1521	1195	1955	1365	800	2404	1842	1732	2525	1560	742	1760	893	3521	3476	2950	1697	2415	1393	2729	3098	1244	2183	4020	1641	4232	3367	925	1077	3848	1067	3871	949	1829	3680	3208
84218	646870	288	84218	85:429.0 86:1214.0 87:10.0 88:341.0 89:11183.0 90:975.0 91:387.0 93:54.0 94:95.0 95:30.0 96:13.0 97:142.0 98:400.0 99:226.0 100:7859.0 101:387.0 102:326.0 103:191.0 105:355.0 107:36.0 108:53.0 109:74.0 110:324.0 111:12198.0 112:674.0 113:225.0 114:2329.0 116:262.0 117:762.0 118:62.0 119:193.0 120:40.0 121:105.0 123:124.0 124:53.0 125:109.0 126:198.0 127:196.0 128:272.0 130:446.0 131:424.0 132:195…				136	196	302	187	251	259	784	698	348	578	404	537	536	571	589	412	474	1001	991	1158	337	269	491	606	438	393	777	1066	360	1034	426	452	727	708	413	735	1139	256	1255	568
84216	440672	212	84216	85:239.0 86:46.0 87:3.0 88:46.0 89:464.0 90:28.0 91:126.0 92:16.0 93:34.0 96:390.0 98:156.0 99:270.0 100:1229.0 101:162.0 102:123.0 103:137.0 104:162.0 105:70.0 106:61.0 110:181.0 112:5.0 113:187.0 114:219.0 115:56.0 116:212.0 117:304.0 118:88.0 120:492.0 121:64.0 122:76.0 123:26.0 124:53.0 126:27.0 127:29.0 128:95.0 129:167.0 130:434.0 131:212.0 132:5.0 133:152.0 134:104.0 136:32.0 138:75.0 139:…				750	494	589	317	603	231	596	331	471	396	772	654	598	532	525	757	608	994	700	705	707	660	596	718	441	338	575	674	1020	480	877	796	636	418	621	479	469	365	401	445
84196	601097	89	84196	85:651.0 86:150.0 87:235.0 88:41.0 89:6796.0 90:733.0 91:281.0 94:5.0 98:126.0 99:314.0 100:759.0 101:4632.0 102:673.0 103:450.0 105:516.0 106:27.0 108:41.0 109:25.0 110:138.0 112:155.0 113:680.0 114:163.0 115:153.0 116:6550.0 118:223.0 119:36.0 121:106.0 122:13.0 124:25.0 126:532.0 127:37.0 128:144.0 129:228.0 130:135.0 131:1176.0 132:24.0 133:18659.0 134:1997.0 135:722.0 138:61.0 139:14.0 140:1…				1145	1939	2499	1825	1847	1770	3229	3798	1562	2676	3291	3808	9612	4010	2530	908	885	4303	2208	4180	1689	1749	2850	3321	3120	1818	3244	2622	1881	4302	2045	2276	3886	3286	2810	1736	5416	1870	4243	3379
84187	622711	117	84187	85:116.0 86:492.0 87:120.0 88:77.0 89:5486.0 90:369.0 91:145.0 93:126.0 95:98.0 98:69.0 99:146.0 100:1871.0 101:512.0 102:306.0 103:2762.0 104:203.0 105:856.0 107:50.0 108:2.0 109:77.0 111:321.0 112:172.0 113:200.0 114:541.0 115:158.0 116:187.0 117:7301.0 118:566.0 119:430.0 121:17.0 123:157.0 125:260.0 126:324.0 127:245.0 128:563.0 129:372.0 130:504.0 131:936.0 132:344.0 133:5647.0 134:725.0 135…				817	1149	2205	906	610	542	1664	2734	1158	768	1641	2927	2789	3344	1958	15913	1519	1815	37835	955	1499	1104	2727	1113	1136	1053	1813	1581	1727	1930	1952	1633	1032	2060	1730	1509	2133	1339	2795	2572
84181	589628	217	84181	85:592.0 86:78.0 87:91.0 88:97.0 91:130.0 93:21.0 95:93.0 96:123.0 98:37.0 99:476.0 100:278.0 101:1189.0 102:139.0 103:1346.0 104:73.0 105:111.0 108:24.0 109:318.0 111:111.0 113:265.0 115:316.0 116:429.0 117:491.0 118:94.0 119:144.0 121:121.0 122:43.0 123:34.0 124:29.0 127:232.0 128:245.0 129:2914.0 130:203.0 131:461.0 132:112.0 133:3050.0 134:254.0 135:238.0 137:16.0 138:15.0 139:94.0 141:404.0 …				1242	2283	2054	1223	1623	1631	4787	4378	1975	3213	1739	2594	2668	2717	4416	2296	4332	3682	3804	5392	1606	1681	2133	3075	3072	2154	4362	5306	2139	3876	2759	2576	2882	2822	2923	4735	4182	2755	5017	3587
84117	581121	217	84117	85:497.0 86:881.0 88:231.0 89:26011.0 90:2235.0 91:1060.0 95:9.0 96:646.0 98:647.0 99:531.0 100:1828.0 101:6198.0 102:804.0 103:5327.0 104:452.0 105:1548.0 106:127.0 107:89.0 108:30.0 109:17.0 110:604.0 111:201.0 112:493.0 113:355.0 114:1034.0 115:1016.0 116:2610.0 117:5316.0 118:684.0 119:763.0 120:24.0 121:6.0 124:77.0 126:992.0 127:244.0 128:927.0 129:6205.0 130:719.0 131:2563.0 132:414.0 133:…				540	578	737	542	663	2589	1393	1127	554	1023	1018	1443	1073	1426	988	2513	725	832	6573	1025	712	980	948	1824	1188	705	1231	1388	777	1221	2576	1677	1477	1375	1211	805	1376	3709	1357	3243
84116	517387	103	84116	85:144.0 86:64.0 87:351.0 89:236.0 93:11.0 97:5.0 99:77.0 101:796.0 102:91.0 103:8660.0 104:784.0 105:338.0 110:8.0 111:22.0 113:27.0 115:630.0 116:599.0 117:913.0 118:37.0 119:108.0 127:1.0 129:1136.0 130:182.0 131:709.0 132:98.0 133:904.0 134:104.0 135:49.0 141:30.0 143:83.0 147:2600.0 148:912.0 149:453.0 150:27.0 151:20.0 155:403.0 156:155.0 157:106.0 158:107.0 159:71.0 163:6.0 170:4.0 175:16.…				1674	4887	6396	4258	3712	2984	8678	7072	3179	6477	5979	5963	6852	6422	4940	2091	5034	6275	4467	7604	4842	1753	5008	7984	10331	4239	5817	8924	4106	6855	4605	6773	6491	6346	7240	5532	6852	2852	7533	6138
84115	625221	117	84115	85:139.0 86:647.0 87:286.0 88:163.0 89:5770.0 90:365.0 91:70.0 93:4.0 95:22.0 96:4.0 97:5.0 98:166.0 99:119.0 100:2082.0 101:1105.0 102:388.0 103:2461.0 104:215.0 105:450.0 106:37.0 109:30.0 110:75.0 111:695.0 112:272.0 113:326.0 114:193.0 115:428.0 116:625.0 117:8133.0 118:720.0 119:623.0 121:5.0 123:84.0 124:17.0 125:494.0 126:326.0 127:52.0 128:137.0 129:1957.0 130:499.0 131:871.0 132:243.0 13…				406	1490	2205	1594	2044	1243	2130	2369	1351	2378	1122	2209	1175	3092	1900	1723	1981	1851	37835	2745	1088	2221	2121	1954	1339	1384	1176	1894	1727	2904	2466	2191	1233	3493	3578	2159	1630	731	2794	2317
84105	566147	133	84105	85:185.0 87:100.0 88:79.0 89:5868.0 90:425.0 91:379.0 93:14.0 98:105.0 99:199.0 100:323.0 101:2897.0 102:434.0 103:1264.0 104:71.0 105:349.0 107:8.0 109:91.0 112:34.0 113:657.0 114:117.0 115:6.0 116:4840.0 117:1559.0 118:260.0 119:176.0 120:21.0 126:490.0 127:65.0 131:1100.0 132:66.0 133:14759.0 134:1567.0 135:525.0 138:35.0 141:860.0 142:136.0 143:920.0 144:1043.0 145:143.0 146:11.0 147:3802.0 1…				573	601	802	662	818	464	1595	1207	757	821	929	1244	1042	1182	834	467	1258	1959	1039	1339	629	813	1233	968	1082	732	1279	903	939	1504	2639	3624	1046	1439	3667	1205	1170	787	1456	4872
84095	571876	133	84095	86:103.0 87:102.0 88:60.0 89:7220.0 90:415.0 91:326.0 98:182.0 100:57.0 101:2767.0 102:397.0 103:1342.0 104:50.0 105:434.0 106:3.0 108:22.0 109:3.0 110:66.0 112:111.0 113:405.0 114:158.0 115:245.0 116:4153.0 117:2275.0 118:301.0 119:118.0 124:24.0 126:739.0 127:35.0 128:439.0 129:2.0 131:635.0 132:134.0 133:13944.0 134:1474.0 135:523.0 136:5.0 137:47.0 138:28.0 139:114.0 140:141.0 141:232.0 142:2…				1440	2032	2878	1616	2196	1429	3563	3642	1643	3084	2567	3364	3122	2509	2847	1245	4338	5863	3194	2965	1563	1130	3031	3430	2857	1927	1641	1645	1788	3784	1055	1903	4149	2401	3276	4116	6124	1411	3368	2813
84085	1067232	91	84085	85:187.0 87:182.0 89:595.0 90:266.0 91:30164.0 92:2311.0 93:188.0 95:134.0 97:188.0 99:130.0 100:38.0 101:706.0 102:75.0 103:4589.0 104:449.0 105:554.0 106:250.0 107:199.0 108:178.0 109:129.0 110:16.0 111:200.0 113:416.0 114:33.0 115:396.0 116:672.0 117:2738.0 118:230.0 119:297.0 123:31.0 125:16.0 127:31.0 129:4219.0 130:566.0 131:921.0 132:143.0 133:1845.0 134:224.0 135:485.0 141:258.0 142:216.0…				776	2061	1803	1254	1398	199	1588	193	141	182	1865	2270	2134	2043	148	136	196	978	248	223	252	1686	2157	2931	3305	224	316	1487	122	122	2111	1843	2886	2093	2600	201	149	179	243	1031
72488	286123	139	72488	90:344.0 92:836.0 93:384.0 94:102.0 96:89.0 97:2482.0 98:582.0 106:2540.0 107:216.0 109:130.0 113:148.0 114:489.0 118:152.0 124:15.0 126:15926.0 127:9378.0 128:304.0 137:44.0 138:323.0 139:10491.0 140:3873.0 141:75.0 144:540.0 146:26.0 158:39.0 183:641.0 185:37.0 188:217.0 189:10.0 202:69.0 209:35.0 234:65.0 294:3.0 303:6.0 359:8.0 363:11.0 392:4.0 401:4.0 415:14.0 427:6.0 454:6.0 469:5.0 479:1.0…				859	2860	1045	3277	1534	2378	6084	6593	810	3422	127	1386	1064	1205	1617	1312	580	1139	2351	2227	3663	1754	1102	213	5730	1325	2468	7606	1248	5519	120	1356	4073	2610	285	1557	1135	674	1385	2409
64546	699999	204	64546	85:30135.0 86:56701.0 87:49167.0 88:40901.0 89:43135.0 90:6707.0 95:6207.0 98:14205.0 100:199835.0 101:150460.0 102:81856.0 103:93551.0 104:13994.0 105:12093.0 110:7206.0 112:7694.0 113:9922.0 114:83245.0 115:58818.0 116:253460.0 117:508882.0 118:68764.0 119:36638.0 120:6159.0 125:1837.0 127:7870.0 128:75967.0 129:69709.0 130:92027.0 131:76212.0 132:106173.0 133:141045.0 134:26438.0 135:15392.0 1…				440	413	558	250	346	139	2116	686	756	998	813	703	1158	1244	1017	306	2169	1141	681	2291	144	496	490	630	360	733	2551	2035	439	1013	725	1049	1468	815	662	3188	3034	375	4346	2440
44175	274168	85	44175	85:91842.0 86:5692.0 87:4.0 91:3536.0 92:5.0 93:1641.0 94:44.0 95:6393.0 96:406.0 97:6222.0 100:889.0 105:392.0 108:208.0 109:2618.0 112:7.0 114:118.0 116:113.0 117:82.0 118:1502.0 120:131.0 122:306.0 123:157.0 124:334.0 125:117.0 126:382.0 127:48.0 130:2474.0 131:381.0 132:144.0 134:1597.0 135:1076.0 137:2575.0 138:339.0 139:337.0 140:18.0 142:100.0 146:271.0 153:46.0 157:8.0 160:214.0 166:446.0…				14896	15830	15278	13388	18427	18231	19152	20134	16444	14192	16959	15351	19661	19368	19637	16329	13999	16679	15853	16382	14271	14658	18010	18068	16494	15335	14482	14188	17110	15399	15579	17900	17855	14808	13078	16610	18110	15272	14938	14043
42357	701804	116	42357	86:39.0 87:1459.0 88:2030.0 89:985.0 100:256.0 101:3713.0 102:171.0 103:5790.0 104:131.0 105:189.0 106:88.0 107:104.0 108:288.0 110:83.0 112:98.0 114:36.0 115:85.0 116:7137.0 117:14047.0 118:1709.0 119:806.0 133:244.0 142:1.0 145:314.0 147:1682.0 148:212.0 158:22.0 159:8.0 161:1930.0 162:222.0 163:55.0 170:41.0 175:7.0 180:31.0 184:106.0 191:447.0 196:20.0 205:65.0 212:7.0 231:78.0 235:122.0 238:…				362	238	396	1107	477	428	243	645	462	273	453	491	322	394	492	646	376	348	548	272	1210	627	306	505	803	366	398	937	707	693	556	452	70	1183	408	448	335	1089	567	1113
41989	323785	248	41989	86:7975.0 88:717.0 89:17935.0 90:1269.0 91:848.0 93:64.0 96:195.0 98:392.0 100:20613.0 101:11239.0 102:2095.0 103:1178.0 104:116.0 107:1345.0 108:58.0 110:587.0 114:315.0 116:321.0 117:1109.0 118:271.0 127:430.0 128:286.0 129:2211.0 130:1434.0 131:1244.0 132:428.0 133:1036.0 134:1895.0 135:404.0 137:2.0 140:28.0 141:33.0 142:87.0 143:515.0 144:295.0 145:15.0 146:729.0 147:30682.0 148:4382.0 149:2…				11601	12706	22145	15801	21397	17998	33768	34493	16686	31684	7802	38696	29181	28900	30217	7757	45718	45795	19487	34279	21596	25114	28719	30694	35705	22349	38884	34213	26655	42233	29949	23750	35694	36647	36680	33968	59676	25080	48034	28620
41891	395354	316	41891	85:529.0 86:184.0 87:1022.0 88:6884.0 89:443.0 90:267.0 92:49.0 93:760.0 94:113.0 95:8.0 99:247.0 100:952.0 101:166.0 102:805.0 103:512.0 104:312.0 105:46.0 106:274.0 107:37.0 108:326.0 112:67.0 113:210.0 114:314.0 115:152.0 116:298.0 117:1063.0 118:416.0 119:1081.0 120:175.0 121:12.0 124:36.0 127:1.0 128:443.0 130:9885.0 131:3492.0 132:1864.0 133:1443.0 134:2512.0 136:18.0 140:44.0 141:44.0 144:…				433	264	442	382	452	360	320	391	407	285	411	420	434	443	449	285	406	153	467	206	324	413	440	391	383	400	361	369	447	489	446	530	472	444	424	427	433	296	418	386
41890	400788	174	41890	85:91.0 86:3992.0 88:340.0 89:251.0 90:1.0 96:2.0 99:1.0 100:2001.0 104:44.0 105:12.0 106:94.0 107:262.0 110:600.0 111:9.0 114:486.0 115:254.0 116:242.0 118:94.0 120:5.0 123:2.0 126:17.0 128:7.0 130:616.0 134:563.0 140:2.0 141:45.0 142:171.0 143:720.0 144:38.0 146:230.0 149:7.0 155:2.0 158:183.0 159:375.0 160:292.0 161:25.0 170:50.0 172:30.0 173:3.0 174:3359.0 175:555.0 176:282.0 184:597.0 186:58…				121	1586	172	688	536	341	3266	1673	165	982	201	158	709	356	639	144	151	148	281	342	817	275	757	1366	3231	465	553	1898	237	2227	224	203	673	485	420	160	150	100	206	540
34444	953527	259	34444	86:20.0 87:190.0 89:717.0 90:32.0 96:99.0 97:588.0 98:69.0 99:247.0 100:236.0 101:1194.0 102:112.0 103:2430.0 104:139.0 105:313.0 106:83.0 113:168.0 114:76.0 115:719.0 116:428.0 117:779.0 118:62.0 119:126.0 124:50.0 126:70.0 127:145.0 129:1845.0 130:270.0 131:472.0 132:82.0 133:779.0 134:224.0 135:195.0 137:60.0 139:48.0 140:21.0 141:115.0 143:367.0 144:115.0 145:159.0 147:3406.0 148:754.0 149:33…				1016	2629	424	2041	2182	464	1363	1498	581	1326	3388	2593	3342	627	1257	479	1001	1261	886	1144	868	1798	2196	3585	3771	602	1341	2005	625	1110	2291	2471	2884	2850	3255	1211	1449	780	1221	997
34089	604262	117	34089	85:518.0 86:806.0 87:265.0 88:275.0 89:577.0 94:12.0 95:394.0 96:322.0 98:151.0 99:379.0 100:3141.0 101:731.0 102:205.0 103:2824.0 104:129.0 105:148.0 106:8.0 107:107.0 109:402.0 110:64.0 111:88.0 112:109.0 113:199.0 114:1518.0 115:1271.0 116:1037.0 117:6779.0 118:751.0 119:343.0 120:6.0 122:32.0 123:38.0 124:174.0 125:48.0 126:948.0 127:81.0 128:318.0 129:1672.0 130:843.0 131:1012.0 132:318.0 13…				3439	3924	291	3989	4469	2303	1388	6516	711	5851	6782	7292	7530	6304	2152	1736	9574	5904	3227	9645	4574	1048	6024	8472	986	4766	1629	6767	3370	7659	1064	8827	8001	7239	8729	7886	9729	3158	1033	5397
34070	775480	117	34070	85:448.0 86:28.0 87:1.0 88:23.0 89:214.0 90:182.0 93:140.0 94:158.0 95:267.0 96:30.0 97:294.0 98:386.0 99:6.0 101:50.0 102:112.0 103:20.0 105:212.0 109:126.0 111:214.0 112:127.0 113:54.0 114:141.0 116:468.0 117:8602.0 118:739.0 119:283.0 121:21.0 122:100.0 123:75.0 127:61.0 128:183.0 129:3674.0 130:515.0 131:1493.0 132:3331.0 133:616.0 134:312.0 138:25.0 139:82.0 140:84.0 143:354.0 144:41.0 145:2…				1602	1057	1516	1120	1249	1114	2276	1051	1076	1134	1611	1448	2177	1641	699	2675	1624	1943	2712	1950	1550	1184	1243	977	1739	1326	1322	1883	1000	1539	2052	825	1216	3263	701	4250	2117	1422	2857	2751
33282	599952	103	33282	85:440.0 86:438.0 87:859.0 88:1556.0 89:5716.0 90:673.0 91:388.0 93:21.0 94:15.0 95:109.0 96:719.0 97:181.0 98:533.0 99:586.0 100:773.0 101:3505.0 102:738.0 103:41399.0 104:4352.0 105:2182.0 106:77.0 108:305.0 109:41.0 110:300.0 111:158.0 112:137.0 113:396.0 114:622.0 115:769.0 116:1992.0 117:5822.0 118:711.0 119:701.0 120:126.0 121:63.0 123:8.0 124:688.0 125:69.0 126:1047.0 128:434.0 129:3023.0 …				2112	4427	4476	4113	4030	3191	5268	1088	2450	4154	6189	6115	5729	6214	947	1903	5703	3866	4405	8944	3426	3601	5762	7538	3647	3581	1419	386	3818	807	4204	4105	2175	6631	1907	5597	8318	2653	7163	7785
31263	595292	129	31263	85:545.0 86:126.0 87:1404.0 88:482.0 89:2921.0 90:352.0 91:206.0 94:75.0 95:123.0 96:220.0 97:591.0 99:1410.0 100:293.0 101:4786.0 102:681.0 103:21317.0 104:1857.0 105:1112.0 106:59.0 109:55.0 111:658.0 113:1130.0 114:251.0 115:2264.0 116:1279.0 117:13181.0 118:1241.0 119:1659.0 120:40.0 127:611.0 128:63.0 129:39120.0 130:4550.0 131:4923.0 132:537.0 133:13598.0 134:1591.0 135:1356.0 136:90.0 137:…				827	1175	1002	791	998	1471	638	1601	992	927	1493	1418	1557	1154	1202	2868	1878	1437	2953	1431	1286	970	1117	1320	1344	930	1066	1018	1100	1011	1688	1226	1314	1053	879	1481	1236	1766	2328	373
30962	600399	129	30962	86:543.0 87:409.0 88:82.0 89:1943.0 94:89.0 96:50.0 97:198.0 98:94.0 100:540.0 101:2864.0 102:269.0 103:3101.0 104:325.0 105:383.0 108:110.0 111:280.0 112:288.0 114:477.0 115:457.0 116:694.0 117:1517.0 118:211.0 119:260.0 121:62.0 124:179.0 125:45.0 126:124.0 127:373.0 128:283.0 129:5324.0 130:1061.0 131:3386.0 132:303.0 133:3084.0 134:289.0 135:372.0 137:28.0 138:175.0 139:58.0 140:115.0 141:104…				2818	6544	6251	5742	5336	2614	7714	8658	3548	5861	1036	2018	7868	8792	6453	2703	7580	5677	6313	12916	1394	5209	8236	9949	9367	5142	6883	7540	5401	12146	5534	6007	7792	8139	7048	7831	11702	3427	9890	10368
26987	409449	301	26987	88:1673.0 89:898.0 90:1929.0 91:3821.0 92:1405.0 94:122.0 97:1877.0 98:59150.0 99:4919.0 101:327.0 102:1904.0 103:6900.0 104:1822.0 108:2810.0 110:81560.0 111:3405.0 112:2224.0 113:307.0 114:3219.0 116:11378.0 117:2736.0 118:2285.0 119:253.0 120:2435.0 121:665.0 123:63.0 125:539.0 128:320.0 130:3904.0 131:1598.0 132:1234.0 133:1243.0 134:18410.0 135:2346.0 136:16417.0 137:954.0 138:171.0 139:220.…				149	178	337	221	122	137	112	146	169	166	223	83	184	278	165	125	242	192	142	202	110	182	214	38	189	162	198	191	129	175	154	106	225	196	244	181	278	128	222	236
22888	272249	174	22888	85:382.0 86:10277.0 87:1030.0 88:760.0 89:2551.0 90:376.0 91:288.0 92:1.0 98:1.0 99:467.0 100:11714.0 101:2149.0 102:935.0 103:205.0 104:384.0 105:7.0 106:363.0 107:225.0 108:243.0 109:193.0 110:492.0 111:14.0 113:154.0 114:171.0 115:314.0 116:411.0 117:322.0 118:221.0 119:4.0 120:67.0 125:3.0 126:179.0 128:5.0 130:2802.0 131:855.0 132:597.0 133:1355.0 134:1621.0 135:446.0 136:90.0 139:17.0 140:5…				2918	1627	2227	5213	2035	3518	1806	1719	2101	3837	1859	1593	1648	1825	1518	1324	787	3175	2420	2223	2327	4582	1871	3443	3910	2320	2996	3562	1498	3612	4957	2303	561	3968	1520	1988	827	1941	2200	991
22423	230574	170	22423	85:28.0 86:195.0 88:263.0 91:24.0 93:122.0 98:98.0 99:16.0 100:23.0 101:81.0 103:470.0 104:222.0 107:223.0 108:94.0 109:40.0 110:558.0 111:12.0 112:37.0 113:243.0 116:87.0 117:231.0 118:103.0 119:240.0 120:1105.0 121:61.0 132:26.0 133:10.0 134:554.0 135:166.0 136:25.0 137:19.0 139:4.0 140:24.0 141:5.0 143:611.0 144:373.0 146:133.0 147:1132.0 149:141.0 151:55.0 157:61.0 170:1908.0 171:109.0 172:23…				4710	1015	1808	5186	3187	6552	2025	4749	2473	4483	3534	5606	993	1360	1777	5330	5700	3866	3735	2823	4038	4480	1606	3843	4279	3046	4642	4633	5977	4754	3002	2198	2100	4874	1786	2877	3058	6443	2610	845
21657	585652	123	21657	85:211.0 91:41.0 93:25.0 95:231.0 97:91.0 98:76.0 99:15.0 105:74.0 107:174.0 108:35.0 109:278.0 113:15.0 117:31.0 121:59.0 122:37.0 123:1985.0 124:383.0 125:90.0 127:32.0 130:12.0 134:32.0 137:1221.0 138:22.0 147:42.0 148:1.0 165:293.0 166:11.0				900	799	1044	763	1015	459	534	471	1130	824	1220	630	1229	1250	1073	383	911	1585	396	1384	688	904	1198	1002	949	921	939	1121	535	870	1390	1066	1632	1108	1256	1433	1300	1168	1148	1009
19901	633968	143	19901	85:765.0 86:604.0 87:565.0 88:188.0 89:7782.0 90:361.0 91:468.0 93:160.0 95:167.0 97:366.0 98:236.0 99:520.0 100:3494.0 101:2160.0 102:1013.0 103:5687.0 104:338.0 105:492.0 107:110.0 111:409.0 113:757.0 115:673.0 116:3687.0 117:6304.0 118:567.0 119:320.0 120:119.0 121:12.0 126:163.0 127:625.0 128:121.0 129:2911.0 131:693.0 132:843.0 133:2774.0 134:332.0 135:283.0 140:50.0 141:409.0 142:187.0 143:…				1827	3165	3699	2227	2669	1877	4970	3700	1956	2243	2548	2063	3045	2539	2075	2325	2150	2884	3212	924	1776	1611	2385	2875	2342	1731	1595	3100	1124	3415	2549	2278	2799	3334	2351	2438	2987	1930	4637	3492
18588	814481	128	18588	86:65.0 100:209.0 103:178.0 112:33.0 114:46.0 128:1550.0 129:208.0 130:59.0 133:57.0 134:34.0 146:31.0 147:316.0 153:24.0 154:31.0 162:9.0 202:11.0 220:17.0 245:32.0 443:20.0 475:25.0				439	238	221	623	440	476	633	859	110	753	673	816	437	198	196	632	132	782	997	1308	392	411	195	709	658	334	986	1230	623	1095	676	122	155	813	315	715	1136	290	935	974
18485	991205	169	18485	85:73.0 86:63.0 87:39.0 88:24.0 95:43.0 97:69.0 99:220.0 100:58.0 101:117.0 102:52.0 105:47.0 110:44.0 111:43.0 113:166.0 115:123.0 116:36.0 119:78.0 120:30.0 124:47.0 125:63.0 129:356.0 131:108.0 133:393.0 137:45.0 138:40.0 140:70.0 141:51.0 142:94.0 143:164.0 147:782.0 149:93.0 153:54.0 154:29.0 157:36.0 160:27.0 162:17.0 163:47.0 165:20.0 167:51.0 168:69.0 169:2017.0 170:274.0 171:209.0 172:40…				93	950	636	153	610	126	424	513	692	157	196	429	642	1497	908	299	722	418	179	323	402	174	1036	197	162	530	247	221	561	211	268	685	730	236	802	452	299	406	116	440
18402	578286	89	18402	85:171.0 86:364.0 87:77.0 88:55.0 89:8849.0 90:668.0 91:307.0 96:21.0 97:21.0 98:164.0 99:105.0 100:463.0 101:751.0 102:36.0 103:1915.0 104:59.0 105:555.0 110:18.0 111:30.0 112:212.0 113:104.0 114:423.0 115:287.0 116:197.0 117:1046.0 118:65.0 119:28.0 125:1.0 126:417.0 127:84.0 128:2074.0 129:1001.0 130:167.0 131:631.0 132:159.0 133:1641.0 134:174.0 135:79.0 138:12.0 139:28.0 140:225.0 141:32.0 1…				7292	14351	23713	13994	18908	10143	30544	27467	14726	22166	26132	30031	29423	30959	22622	8383	23461	26766	16770	31462	19410	21567	29239	40162	34400	16059	27561	35027	14424	32207	23167	23011	36747	33485	35585	24939	34712	13900	31843	23166
18386	727163	174	18386	86:335.0 89:231.0 100:275.0 102:4.0 103:234.0 116:6.0 117:258.0 119:61.0 129:27.0 130:59.0 131:12.0 132:8.0 143:82.0 147:453.0 148:3.0 173:66.0 174:1718.0 175:288.0 176:62.0 179:67.0 189:10.0 191:5.0 204:124.0 205:276.0 206:19.0 217:117.0 288:212.0				11420	13761	15645	9760	11991	2133	11248	5569	7775	9250	15643	10993	16118	13815	9744	2196	12385	18369	5316	13368	4414	11259	16463	17912	16848	4726	13745	13684	2507	12537	17359	15874	22623	15648	19736	14844	12860	3809	20395	13468
18361	950622	361	18361	85:557.0 86:226.0 88:82.0 89:3038.0 90:162.0 91:104.0 92:13.0 93:46.0 94:31.0 95:28.0 97:166.0 98:112.0 99:302.0 100:785.0 101:2284.0 102:697.0 103:7672.0 104:696.0 105:1492.0 106:56.0 107:53.0 108:7.0 109:272.0 111:257.0 113:435.0 114:464.0 115:451.0 116:1087.0 117:4820.0 118:454.0 119:427.0 122:1.0 126:38.0 127:126.0 128:173.0 129:7322.0 130:1261.0 131:1922.0 132:177.0 133:3101.0 134:535.0 135:…				365	386	557	459	435	155	811	928	239	640	812	1037	1138	1076	331	5101	339	416	353	1517	630	559	932	1218	1508	254	712	1039	380	777	878	698	1182	1091	757	815	942	363	528	864
18347	477086	141	18347	95:13.0 106:21.0 107:25.0 110:21.0 111:18.0 112:2.0 113:318.0 114:21.0 123:53.0 125:56.0 132:1.0 141:2337.0 142:152.0 143:4.0 144:34.0 145:10.0 152:1.0 153:8.0 154:20.0 155:182.0 156:26.0 157:31.0 161:5.0 163:5.0 164:13.0 165:3.0 167:5.0 171:32.0 172:88.0 180:25.0 181:55.0 182:23.0 188:30.0 197:34.0 198:3.0 200:14.0 210:38.0 212:16.0 225:7.0 227:25.0 231:19.0 241:2.0 247:18.0 250:5.0 253:17.0 255…				4036	3249	3229	2795	3163	2871	3413	4736	3853	4454	3341	2747	2996	3166	3520	2053	2699	3612	1751	4374	3254	3702	3640	4297	4582	3990	4334	5005	3208	3197	3200	3038	4072	4093	3580	2427	3451	2718	3589	2606
18321	972784	361	18321	85:379.0 86:72.0 87:240.0 88:65.0 89:1083.0 90:159.0 91:280.0 92:147.0 93:105.0 94:124.0 96:29.0 97:112.0 98:87.0 99:251.0 100:164.0 101:934.0 102:193.0 103:6705.0 104:860.0 105:467.0 106:84.0 107:182.0 108:106.0 109:544.0 110:63.0 111:224.0 112:47.0 113:385.0 114:47.0 115:361.0 116:372.0 117:2497.0 118:232.0 119:632.0 120:329.0 121:467.0 122:394.0 123:271.0 125:35.0 126:302.0 127:210.0 129:6147.…				159	150	242	184	222	92	298	165	173	60	311	302	67	133	270	143	119	305	268	230	135	58	209	251	347	117	274	363	144	283	138	251	305	236	247	168	143	150	132	109
18305	609795	217	18305	85:221.0 87:130.0 88:149.0 92:5.0 94:16.0 99:105.0 101:317.0 102:77.0 103:1722.0 104:170.0 109:27.0 111:165.0 113:144.0 115:79.0 116:34.0 117:989.0 118:23.0 119:94.0 120:6.0 121:12.0 123:13.0 124:24.0 125:71.0 127:111.0 129:1831.0 130:162.0 131:513.0 132:5.0 133:1419.0 134:77.0 135:94.0 140:5.0 141:512.0 142:57.0 143:682.0 144:2.0 145:65.0 147:5572.0 148:1008.0 149:651.0 150:83.0 151:68.0 153:17.…				4724	3093	4684	2938	8207	7180	2124	2721	4759	3674	6341	5326	5393	8085	7213	13408	9994	7808	28089	8402	6146	4923	7175	10195	8852	3451	5773	5092	2390	4215	6843	10409	8162	9594	6198	1824	7319	4511	9240	11593
18185	492601	199	18185	85:58.0 89:54.0 91:25.0 92:7.0 97:99.0 112:44.0 124:10.0 125:4.0 130:102.0 138:5.0 139:32.0 145:28.0 147:179.0 148:40.0 156:269.0 160:2.0 190:15.0 199:2045.0 200:258.0 205:26.0 219:26.0 220:1.0 227:7.0 255:144.0 258:17.0 262:49.0				1172	943	851	950	1033	763	1037	727	1213	1179	1142	822	1100	1172	1090	704	952	1131	609	828	498	1074	1305	1252	1385	1090	1075	1171	695	1039	1040	1050	1229	1068	1230	921	903	792	466	978
18173	415283	131	18173	102:1431.0 103:53.0 107:48.0 115:626.0 116:29.0 117:31.0 129:13.0 130:734.0 131:9686.0 132:1130.0 133:1174.0 134:135.0 135:26.0 143:437.0 144:92.0 145:48.0 147:1959.0 148:196.0 149:274.0 150:8.0 191:47.0 207:8.0 217:47.0 220:23.0 221:253.0 222:16.0 277:51.0 292:844.0 293:208.0 294:49.0 305:30.0				1990	2487	2682	1883	2540	1696	3359	1713	2188	2069	761	3190	2657	2584	2555	1390	2474	2580	3529	3347	2356	2697	2743	3203	3213	3193	3316	3728	1898	3429	3374	2789	4007	3584	3807	2790	2938	1619	4248	1949
18168	1149309	255	18168	85:3225.0 86:139.0 87:92.0 88:24.0 89:706.0 90:72.0 91:9458.0 92:1690.0 93:6248.0 94:1551.0 95:7904.0 96:924.0 97:1749.0 98:167.0 99:362.0 101:715.0 102:90.0 103:783.0 104:353.0 105:8527.0 106:2144.0 107:7770.0 108:1334.0 109:3081.0 110:617.0 111:992.0 112:15.0 113:42.0 115:1149.0 116:590.0 117:2968.0 118:895.0 119:5119.0 120:1868.0 121:3139.0 122:1179.0 123:1495.0 124:387.0 125:243.0 127:168.0 1…				1667	970	1325	1344	1576	1647	1652	2122	2288	2074	1144	1644	1492	1859	1771	1571	2078	1949	1113	1285	1952	1184	1515	1951	1462	1596	2201	2838	1357	1540	1514	1916	2126	1741	1645	1915	1068	1628	1071	1483
18022	1061028	467	18022	85:19442.0 86:1198.0 88:2750.0 89:16378.0 90:1758.0 91:20014.0 92:2131.0 93:909.0 94:1010.0 95:5051.0 96:4345.0 97:29323.0 98:3652.0 99:8923.0 100:81.0 101:10771.0 102:744.0 103:25841.0 104:2548.0 105:1730.0 107:312.0 109:1776.0 110:838.0 111:15569.0 112:1730.0 113:4083.0 114:935.0 115:3373.0 116:690.0 117:400.0 118:67.0 120:11.0 121:1000.0 122:233.0 123:1039.0 124:566.0 125:5568.0 126:598.0 127:…				778	623	1003	1182	575	1383	378	908	1207	977	893	1101	829	1364	962	893	1091	1666	876	1002	846	1021	1019	1765	1295	1524	1148	1388	1061	1260	1154	962	1787	476	1303	1491	1271	1286	959	1060
17932	623151	291	17932	85:164.0 86:78.0 89:4876.0 90:271.0 99:694.0 100:1044.0 101:504.0 102:19.0 103:10351.0 104:844.0 105:198.0 110:104.0 113:154.0 114:201.0 116:957.0 117:2515.0 118:143.0 124:7.0 126:212.0 128:2336.0 129:862.0 130:245.0 131:1807.0 132:91.0 133:3396.0 134:488.0 140:72.0 141:10.0 143:373.0 144:184.0 146:241.0 147:4512.0 148:200.0 152:17.0 157:58.0 159:1087.0 163:200.0 171:12.0 172:389.0 173:100.0 175:…				87	342	257	116	247	241	354	270	225	339	255	209	623	357	472	310	400	406	1068	349	214	347	216	340	296	181	359	236	277	198	260	310	310	177	330	304	171	286	612	572
17664	227179	173	17664	85:240.0 86:247.0 88:292.0 90:108.0 91:68.0 92:65.0 93:256.0 94:24.0 96:1.0 97:109.0 98:110.0 99:222.0 100:6.0 107:655.0 108:5.0 110:421.0 111:48.0 113:553.0 114:55.0 116:283.0 117:3391.0 118:17.0 119:157.0 122:22.0 123:1.0 124:11.0 126:127.0 127:163.0 128:84.0 129:683.0 130:765.0 131:1193.0 132:706.0 135:9.0 136:217.0 140:70.0 145:243.0 146:58.0 150:21.0 153:2.0 161:21.0 173:3321.0 174:366.0 175…				1542	892	8293	3737	4673	3672	4502	605	4844	2234	4163	8221	4062	3631	2668	927	2658	2344	6623	3806	803	4245	627	1871	4733	1155	3060	2961	6213	2736	3567	7603	1801	4557	7476	3915	3306	9896	3538	3237
17663	719173	204	17663	86:22.0 100:93.0 103:1177.0 106:5.0 117:552.0 127:148.0 129:1073.0 130:52.0 131:139.0 133:264.0 143:157.0 147:2197.0 148:382.0 149:5.0 157:139.0 163:6.0 169:43.0 171:20.0 189:353.0 190:49.0 191:498.0 192:97.0 193:67.0 194:16.0 203:32.0 204:4591.0 205:1087.0 206:292.0 207:207.0 208:115.0 215:36.0 217:1295.0 218:309.0 219:56.0 220:3.0 221:566.0 222:61.0 223:45.0 229:13.0 230:37.0 231:8.0 233:10.0 2…				1841	6613	2811	2669	2506	3785	1838	3119	3091	3957	4698	1933	7479	3373	4829	6730	2739	3299	10678	5877	3105	2681	3102	2524	1482	3370	3214	946	2718	1984	6070	5328	2348	3125	1708	2876	778	3690	6702	8494
17589	1006855	439	17589	85:64931.0 86:5022.0 87:16.0 88:5288.0 89:79481.0 90:7861.0 91:69796.0 92:5468.0 93:4092.0 94:1081.0 95:17214.0 96:10799.0 97:121168.0 98:11866.0 99:33815.0 100:4403.0 101:35545.0 102:4518.0 103:116968.0 104:11256.0 105:5078.0 107:1511.0 108:390.0 109:6642.0 110:3398.0 111:58590.0 112:6423.0 113:19251.0 114:2688.0 115:20115.0 116:3244.0 117:4767.0 118:707.0 119:5.0 120:294.0 121:979.0 122:324.0 1…				419	639	693	155	577	1179	803	704	1188	846	896	1025	437	847	1094	681	2102	2103	1268	1027	617	636	173	839	507	1173	958	1352	1223	1148	829	860	684	1344	658	1609	1350	1408	1508	1532
17334	587510	292	17334	86:3491.0 87:1180.0 88:107.0 90:83.0 91:111.0 92:60.0 95:153.0 96:523.0 97:5.0 98:251.0 99:40.0 100:1368.0 102:792.0 103:10485.0 104:879.0 105:649.0 106:127.0 108:78.0 109:1.0 110:19.0 113:343.0 114:82.0 115:67.0 117:289.0 118:52.0 119:127.0 120:94.0 121:112.0 123:68.0 124:165.0 126:90.0 127:52.0 129:1262.0 130:999.0 131:949.0 132:46.0 133:798.0 134:659.0 136:5.0 137:5.0 140:70.0 141:48.0 142:111…				296	677	673	398	422	439	2383	2112	998	1691	391	1139	1192	1183	1886	665	592	1921	1736	2886	539	649	751	905	580	892	2336	2872	828	1361	785	595	1426	859	778	2480	2249	1066	2462	1155
17298	712541	217	17298	85:126.0 95:144.0 99:296.0 100:198.0 101:183.0 107:114.0 114:2.0 115:134.0 119:77.0 123:241.0 125:114.0 131:485.0 133:1917.0 134:36.0 135:51.0 142:378.0 143:14300.0 144:1507.0 145:373.0 147:7475.0 148:701.0 149:855.0 150:61.0 153:147.0 157:149.0 159:13.0 161:55.0 167:21.0 169:261.0 171:94.0 172:5.0 173:47.0 175:9.0 177:29.0 178:4.0 181:57.0 183:25.0 189:2.0 195:99.0 196:29.0 197:489.0 198:41.0 19…				472	998	967	683	712	610	1718	1186	681	1854	834	1334	1283	1162	1988	813	1229	1190	1742	2225	857	705	1198	1002	998	865	1115	392	724	1498	916	908	1526	1251	917	1661	1169	1073	1368	1690
17233	315594	170	17233	85:508.0 86:638.0 88:143.0 92:56.0 94:200.0 95:113.0 96:92.0 97:350.0 98:3230.0 99:3266.0 100:2039.0 101:334.0 102:238.0 103:127.0 104:34.0 106:161.0 107:493.0 110:854.0 111:22.0 113:3036.0 114:304.0 115:34.0 116:1389.0 118:34.0 124:436.0 126:1936.0 127:377.0 128:503.0 130:872.0 134:1119.0 136:2.0 138:25.0 139:115.0 140:160.0 141:183.0 142:699.0 143:120.0 144:307.0 154:13.0 155:1.0 156:1165.0 157…				245	639	661	389	586	86	631	244	268	431	462	229	584	699	597	109	354	306	204	681	207	387	499	517	1313	550	368	558	235	631	384	453	722	642	353	505	554	139	371	603
17144	596045	171	17144	85:289.0 86:393.0 87:88.0 88:42.0 89:547.0 91:190.0 92:34.0 96:1.0 98:129.0 99:1051.0 100:7694.0 101:628.0 102:792.0 103:2481.0 104:104.0 105:20.0 107:3.0 110:114.0 111:277.0 112:1.0 114:84.0 115:328.0 116:276.0 117:476.0 119:145.0 120:8.0 121:20.0 125:50.0 126:14.0 127:107.0 129:150.0 130:621.0 132:10.0 133:262.0 134:305.0 135:2.0 137:13.0 138:20.0 139:66.0 141:318.0 143:267.0 144:23.0 145:74.0 …				109	203	115	115	94	182	201	243	176	145	196	178	164	165	129	479	224	236	409	240	88	138	143	104	140	119	202	136	192	250	227	209	223	192	170	109	291	257	390	303
17076	662249	204	17076	86:54.0 89:101.0 94:2.0 98:68.0 100:186.0 101:13.0 102:15.0 103:1000.0 104:31.0 111:12.0 114:17.0 116:229.0 117:253.0 120:107.0 123:8.0 126:131.0 127:314.0 128:47.0 129:584.0 131:199.0 133:118.0 135:30.0 140:10.0 141:18.0 144:51.0 147:1919.0 155:38.0 156:163.0 157:171.0 166:30.0 168:42.0 169:103.0 170:47.0 171:1.0 172:43.0 174:157.0 175:21.0 184:47.0 189:364.0 190:47.0 191:231.0 197:20.0 202:4.0 …				1341	1806	1527	1285	1617	1601	3950	3277	1851	2889	2664	2876	3656	1722	2626	1731	2441	3922	4797	4081	1820	239	2173	2972	2328	1765	3602	4231	2136	3079	2661	2408	1964	2276	2938	1000	3842	2041	3820	3107
17068	265535	267	17068	88:160.0 90:21.0 91:50.0 93:208.0 94:26.0 96:136.0 97:614.0 98:540.0 99:75.0 100:107.0 103:81.0 104:65.0 105:43.0 106:34.0 107:295.0 108:87.0 109:40.0 112:30.0 114:30.0 116:484.0 117:40.0 118:113.0 119:48.0 121:2.0 123:25.0 124:31.0 125:95.0 126:104.0 130:309.0 131:506.0 134:807.0 135:20.0 136:6.0 138:14.0 139:14.0 140:18.0 141:4.0 142:21.0 144:44.0 145:133.0 146:538.0 147:1296.0 148:333.0 150:4.…				931	683	368	726	414	584	591	390	281	637	1401	491	303	466	398	370	366	851	311	1002	407	627	383	699	663	400	558	709	594	671	971	535	575	1168	497	719	1111	582	952	275
17010	754589	204	17010	87:611.0 94:1.0 101:21.0 103:564.0 107:87.0 110:18.0 113:19.0 116:30.0 117:788.0 123:1.0 124:3.0 129:648.0 131:689.0 133:36.0 140:6.0 145:30.0 146:55.0 147:1674.0 149:42.0 161:11.0 169:83.0 170:50.0 171:23.0 183:7.0 184:24.0 189:438.0 190:76.0 191:601.0 192:22.0 201:9.0 203:83.0 204:7411.0 205:1728.0 206:667.0 208:136.0 211:11.0 216:3.0 217:1091.0 218:350.0 219:131.0 220:8.0 222:88.0 231:136.0 23…				1055	1843	1957	1665	1912	1353	2426	1889	1538	2070	2196	1983	2804	2181	2046	1143	2148	3315	2431	2633	2236	2053	2163	2673	3066	1489	2536	2421	1816	2055	2406	2854	2564	2750	2725	3115	2268	1297	2820	2553
16747	742150	319	16747	89:1131.0 90:36.0 100:226.0 101:230.0 103:6902.0 104:367.0 110:93.0 113:101.0 114:124.0 117:2265.0 118:7.0 127:16.0 129:2616.0 130:358.0 131:443.0 133:961.0 143:163.0 144:13.0 147:4944.0 148:730.0 149:198.0 157:2547.0 158:291.0 159:94.0 160:22.0 161:34.0 169:19.0 172:769.0 173:333.0 174:29.0 177:80.0 184:5.0 187:17.0 188:83.0 189:646.0 190:167.0 191:216.0 192:35.0 201:128.0 202:49.0 203:104.0 204…				453	1403	1442	799	1049	487	5485	2202	589	1800	2274	2616	3316	1993	1821	1456	1529	2256	3534	2248	1040	1379	2021	2289	1847	1081	2373	2252	1635	3311	1760	1450	1994	2551	2010	1975	2296	954	4899	2987
16594	761461	204	16594	101:109.0 103:91.0 117:41.0 129:402.0 131:268.0 132:50.0 133:126.0 143:484.0 144:45.0 145:3.0 147:520.0 155:36.0 157:60.0 159:214.0 161:54.0 169:201.0 182:11.0 189:215.0 191:133.0 192:11.0 193:45.0 195:5.0 197:4.0 204:3841.0 205:894.0 206:401.0 207:65.0 214:2.0 215:16.0 217:732.0 218:157.0 219:86.0 229:7.0 231:79.0 233:199.0 241:10.0 243:39.0 245:11.0 252:63.0 253:10.0 257:12.0 259:2.0 268:21.0 2…				417	690	750	714	840	96	1039	1078	611	588	1010	749	1018	925	855	377	790	861	2462	1236	848	860	1001	1351	1210	665	878	752	115	2294	1035	1039	1044	1116	981	2726	1068	580	264	924
16572	292289	209	16572	85:205.0 86:19.0 87:425.0 88:387.0 89:2608.0 90:159.0 91:1427.0 92:192.0 93:499.0 94:36.0 95:128.0 97:2339.0 98:182.0 99:883.0 100:165.0 101:87.0 103:659.0 104:89.0 105:1037.0 107:926.0 108:242.0 109:303.0 110:70.0 111:87.0 113:51.0 115:93.0 116:140.0 117:40.0 119:395.0 120:62.0 121:459.0 122:53.0 123:12.0 126:4.0 127:84.0 129:3805.0 130:443.0 131:671.0 132:27.0 133:412.0 134:511.0 135:1975.0 136…				5896	5239	5599	5806	6049	6183	5508	6019	5538	5635	5266	6044	5315	5348	4773	5503	5371	5254	5759	5458	5568	5863	5384	5719	790	5697	6292	5992	5825	5832	5455	5413	5786	5877	5379	5560	5664	5743	5803	5214
16561	245883	155	16561	88:9344.0 89:1820.0 90:325.0 91:1578.0 93:1.0 94:37.0 95:378.0 96:782.0 98:255.0 99:135.0 100:399.0 103:4405.0 104:228.0 105:5275.0 106:1100.0 107:327.0 110:4371.0 111:630.0 114:61.0 115:1240.0 117:1418.0 118:418.0 119:1281.0 120:75.0 121:463.0 124:62.0 127:343.0 130:2047.0 131:1273.0 132:189.0 133:4193.0 134:2628.0 135:786.0 137:520.0 138:431.0 141:220.0 142:72.0 143:86.0 145:193.0 146:189.0 148…				489	1768	628	812	599	519	2134	1415	580	1130	551	423	845	637	875	374	316	396	714	534	839	746	949	1406	2800	458	725	1685	409	851	579	606	856	627	702	498	455	367	485	774
16551	993518	297	16551	85:8.0 89:479.0 90:170.0 91:125.0 95:261.0 98:16.0 99:64.0 101:1616.0 102:26.0 103:2589.0 104:586.0 105:166.0 107:8.0 111:50.0 112:1.0 113:183.0 114:1.0 115:416.0 116:541.0 117:852.0 118:169.0 119:17.0 121:308.0 122:101.0 123:105.0 126:3.0 129:2270.0 130:201.0 131:219.0 132:252.0 133:1150.0 134:154.0 135:324.0 136:325.0 137:193.0 143:818.0 144:125.0 145:112.0 147:4736.0 148:565.0 149:965.0 150:12…				422	744	1000	720	675	632	1279	1337	808	1267	735	816	895	857	974	407	1073	1025	950	998	731	701	639	1161	1241	778	1105	1597	850	1165	767	778	1011	839	829	709	840	599	874	791
16549	577382	227	16549	85:1235.0 86:1522.0 87:1258.0 88:174.0 89:341.0 90:84.0 94:172.0 95:29.0 97:126.0 98:1117.0 99:693.0 100:8759.0 101:2169.0 102:1033.0 103:2085.0 104:298.0 105:629.0 107:231.0 108:56.0 110:293.0 111:121.0 112:3976.0 113:4443.0 114:3509.0 115:3318.0 116:1811.0 117:1054.0 118:492.0 119:559.0 120:13.0 121:13.0 123:5.0 124:98.0 125:84.0 126:7661.0 127:1238.0 128:17604.0 129:4078.0 130:2055.0 131:7945.…				7200	3279	18169	5528	9074	4192	32409	49769	14169	24810	16285	48140	24191	2004	3950	14735	13787	19138	54708	90699	30519	8684	4807	28735	37859	11298	33397	46885	22167	41082	33098	18589	31728	36601	16669	46842	25202	11069	71795	57814
14723	942855	129	14723	85:102.0 86:21.0 87:60.0 89:442.0 90:24.0 91:45.0 93:17.0 95:4.0 96:50.0 97:16.0 98:2.0 99:42.0 100:27.0 101:268.0 102:15.0 103:1870.0 104:165.0 105:94.0 106:3.0 107:51.0 108:7.0 109:99.0 110:5.0 111:61.0 112:5.0 113:97.0 115:90.0 116:214.0 117:502.0 118:49.0 119:99.0 120:3.0 122:3.0 125:10.0 127:43.0 128:13.0 129:2189.0 130:283.0 131:429.0 132:119.0 133:1358.0 134:134.0 135:67.0 139:16.0 140:2.0…				1635	2117	2067	1795	2200	1284	1853	467	1149	1295	2334	2535	1459	2247	1738	1471	613	1932	6743	622	1765	1389	2419	2025	2976	548	495	305	1471	2028	1837	716	2965	2161	2087	1820	1968	1523	9390	1780
14722	520761	129	14722	85:4.0 86:52.0 87:8.0 90:2.0 91:5.0 93:11.0 96:11.0 97:26.0 98:14.0 102:24.0 103:323.0 104:3.0 105:1.0 107:57.0 108:34.0 109:2.0 110:20.0 113:11.0 115:9.0 116:6.0 118:4.0 120:12.0 123:6.0 125:10.0 126:4.0 127:70.0 128:4.0 129:2246.0 130:374.0 131:116.0 132:8.0 133:99.0 134:24.0 135:3.0 136:1.0 138:9.0 141:4.0 143:24.0 144:11.0 147:771.0 148:166.0 149:45.0 153:1.0 155:1.0 156:31.0 157:43.0 160:4.0…				749	941	1007	630	1054	943	2825	2874	1139	1830	1083	1540	1668	1430	2452	799	1545	1069	2259	2352	895	859	1335	1464	1512	1149	2117	3745	1098	1998	1186	1037	1773	2021	1057	2194	2288	666	1937	1527
14703	516866	117	14703	85:296.0 86:36.0 87:183.0 88:19.0 90:4.0 91:12.0 95:4.0 97:829.0 98:27.0 99:100.0 100:1.0 101:405.0 102:984.0 104:27.0 105:20.0 110:9.0 111:23.0 113:25.0 115:264.0 116:154.0 117:6401.0 118:680.0 119:326.0 120:19.0 127:31.0 129:2733.0 130:1049.0 131:1840.0 132:253.0 133:1095.0 134:99.0 135:59.0 136:4.0 141:40.0 142:43.0 143:1056.0 144:87.0 145:31.0 147:4022.0 148:638.0 149:573.0 150:29.0 151:7.0 1…				945	1995	1456	1196	1194	1087	3395	3354	497	2883	2376	3168	3207	2348	1690	1567	3609	2175	2819	4449	1299	1672	1827	2195	1790	2034	2997	3511	1679	1553	2078	2395	4728	2445	1894	4014	3130	1395	4969	1748
14698	494397	219	14698	85:51.0 88:11.0 89:224.0 90:12.0 92:4.0 94:2.0 95:9.0 99:13.0 101:270.0 102:45.0 103:907.0 104:66.0 105:47.0 106:6.0 107:33.0 108:10.0 113:31.0 114:7.0 115:691.0 116:101.0 117:4222.0 118:397.0 119:202.0 120:22.0 121:6.0 123:1.0 124:1.0 126:5.0 127:115.0 128:12.0 129:2752.0 130:455.0 131:1642.0 132:171.0 133:797.0 134:154.0 135:50.0 136:6.0 141:74.0 143:376.0 144:34.0 145:20.0 146:12.0 147:2704.0 …				2356	4164	4878	3206	3561	4600	11967	11929	6004	7611	5356	6665	6759	5699	12974	3401	4951	8930	9685	10517	4230	4754	5071	6169	7406	6239	7739	17027	7940	9723	4971	5905	5664	7126	6092	10020	8813	3899	11335	9975
14696	895535	117	14696	85:251.0 86:86.0 87:90.0 88:30.0 89:1274.0 90:99.0 91:37.0 92:21.0 93:17.0 94:20.0 95:144.0 97:9.0 98:26.0 99:158.0 100:285.0 101:600.0 102:152.0 103:1128.0 104:100.0 105:148.0 106:19.0 107:54.0 108:31.0 109:42.0 110:39.0 111:80.0 112:160.0 113:155.0 114:82.0 115:295.0 116:285.0 117:7693.0 118:763.0 119:347.0 120:36.0 121:14.0 122:3.0 123:72.0 124:36.0 125:37.0 126:133.0 127:337.0 128:110.0 129:2…				1112	1603	1751	1268	1123	1026	3024	2781	1421	2225	2024	2285	2458	2425	2019	695	1692	2820	1567	1529	1655	1709	2177	3051	3094	1352	2579	3548	1404	2769	1746	1994	2705	3000	2585	2176	2617	1116	2054	1961
13146	761091	357	13146	85:395.0 87:316.0 88:67.0 89:573.0 90:39.0 95:114.0 99:265.0 101:5820.0 102:707.0 103:9703.0 104:1076.0 105:383.0 106:76.0 107:199.0 110:25.0 111:135.0 113:760.0 114:141.0 115:983.0 116:1082.0 117:1299.0 118:200.0 119:309.0 121:149.0 122:80.0 123:297.0 124:42.0 125:59.0 127:19.0 128:131.0 129:4712.0 130:546.0 131:2802.0 132:321.0 133:2584.0 134:358.0 135:518.0 136:48.0 137:200.0 139:76.0 140:68.0…				773	888	862	1076	1876	456	1053	1445	667	1008	1850	377	1591	1844	1054	320	1050	280	488	1355	1524	199	2107	2347	2515	672	1227	1640	536	2055	1872	1225	2212	2735	1995	1781	1487	413	887	596
8621	402956	194	8621	86:172.0 87:75.0 88:33.0 89:690.0 90:11.0 91:78.0 92:407.0 93:420.0 96:6.0 99:3.0 100:658.0 101:2159.0 102:57.0 103:1364.0 106:130.0 107:923.0 108:75.0 109:214.0 110:684.0 111:3.0 113:10.0 117:1811.0 118:41.0 119:2.0 120:276.0 122:128.0 123:1034.0 124:450.0 125:109.0 126:24.0 129:6.0 134:425.0 136:227.0 139:76.0 143:993.0 145:11.0 148:4.0 150:331.0 151:25.0 152:1.0 153:1.0 155:232.0 158:354.0 160…				507	592	794	510	519	303	520	405	690	638	776	461	878	924	842	228	1032	828	367	1099	359	729	918	691	779	568	609	1089	397	507	663	966	1048	688	829	734	901	434	774	708
6435	736475	290	6435	85:189.0 86:20.0 88:97.0 89:1442.0 90:28.0 93:5.0 95:43.0 98:111.0 99:22.0 100:415.0 101:533.0 102:206.0 103:982.0 104:2.0 108:19.0 109:42.0 110:108.0 112:224.0 113:43.0 114:126.0 116:50.0 117:303.0 122:2.0 124:8.0 126:344.0 128:76.0 130:217.0 131:400.0 132:91.0 133:2515.0 134:52.0 135:250.0 138:6.0 139:9.0 141:30.0 142:682.0 143:554.0 144:54.0 145:17.0 147:3175.0 148:978.0 149:454.0 151:33.0 154…				201	222	372	280	321	336	519	405	360	312	376	469	170	523	294	113	473	703	418	812	343	328	335	508	548	394	509	571	367	600	358	352	546	678	268	587	653	409	642	496
6406	995897	361	6406	85:570.0 86:106.0 87:378.0 88:293.0 89:309.0 91:421.0 94:30.0 96:321.0 97:260.0 98:77.0 99:204.0 100:35.0 101:329.0 103:5537.0 104:486.0 105:147.0 109:212.0 112:134.0 113:235.0 114:238.0 115:40.0 116:185.0 117:1079.0 118:14.0 119:502.0 120:116.0 125:94.0 127:74.0 128:182.0 129:2071.0 130:211.0 131:542.0 132:41.0 133:314.0 134:36.0 139:49.0 140:119.0 141:120.0 142:6.0 143:354.0 144:91.0 145:262.0 …				225	366	348	239	323	264	393	382	346	474	370	390	356	367	427	188	468	415	227	432	322	266	431	441	504	236	473	738	332	268	393	397	429	544	421	429	449	230	415	560
6405	668724	374	6405	89:1145.0 91:115.0 95:169.0 96:222.0 98:530.0 100:927.0 101:750.0 103:262.0 104:30.0 107:84.0 108:46.0 109:62.0 112:441.0 113:160.0 114:296.0 117:1352.0 118:152.0 119:165.0 121:145.0 123:146.0 124:200.0 126:105.0 127:223.0 128:909.0 129:291.0 130:250.0 131:371.0 133:490.0 135:224.0 136:54.0 140:93.0 141:132.0 143:130.0 144:110.0 145:75.0 147:4335.0 148:791.0 149:469.0 150:2.0 153:21.0 154:176.0 1…				520	388	453	570	561	805	1524	1998	183	502	464	1403	627	366	281	554	679	636	1578	645	795	281	265	634	677	168	712	839	751	944	216	256	316	903	360	481	1336	730	979	534
6404	757916	204	6404	85:25.0 86:212.0 89:67.0 99:126.0 100:107.0 101:899.0 103:1783.0 104:17.0 113:141.0 115:28.0 116:177.0 117:1041.0 129:1267.0 130:50.0 131:461.0 132:34.0 133:296.0 141:88.0 143:127.0 144:4.0 145:1074.0 146:96.0 147:2484.0 148:315.0 149:66.0 155:40.0 157:32.0 160:89.0 163:1.0 169:264.0 174:8.0 176:28.0 189:390.0 190:100.0 191:632.0 192:53.0 193:27.0 195:58.0 202:13.0 203:241.0 204:6953.0 205:1256.0…				925	1317	1362	1109	1212	1093	2045	1272	1408	1764	2228	1394	1789	1584	1801	866	1772	2881	1744	2374	1300	1376	1515	2290	2045	1320	1764	1601	1297	1645	1890	1543	2104	2331	1839	2993	2026	818	2567	1969
5576	300553	197	5576	86:228.0 88:26.0 89:24.0 90:18.0 92:14.0 95:24.0 99:190.0 100:170.0 101:3.0 102:72.0 104:50.0 105:3.0 106:23.0 107:235.0 108:61.0 109:33.0 110:40.0 111:12.0 117:10.0 127:131.0 129:543.0 131:90.0 134:70.0 136:37.0 143:1.0 147:248.0 148:35.0 149:378.0 153:1076.0 154:277.0 155:15.0 167:12.0 171:111.0 172:12.0 177:1018.0 178:26.0 183:8.0 184:42.0 197:1307.0 198:186.0 199:65.0 201:33.0 251:108.0 259:2…				2409	2072	1269	2354	2446	2097	2183	1780	2013	2231	2008	2364	2098	2024	2015	2251	2097	2102	2290	2147	2160	2430	2023	2263	2343	2237	2212	2285	2243	2364	2077	2081	2230	1764	2155	1912	1535	2353	2202	2160
5483	414447	140	5483	85:62.0 86:695.0 88:213.0 89:449.0 90:216.0 91:33.0 99:21.0 100:446.0 102:20.0 103:81.0 104:8.0 105:43.0 106:33.0 107:23.0 110:130.0 112:57.0 117:24.0 118:16.0 128:25.0 130:434.0 131:14.0 132:73.0 133:102.0 134:346.0 140:3424.0 141:123.0 142:6.0 144:41.0 146:5.0 147:249.0 148:52.0 151:63.0 156:47.0 174:137.0 184:68.0 185:40.0 188:21.0 190:4.0 191:38.0 206:51.0 218:107.0 220:15.0 222:32.0 223:50.0…				35947	58780	43120	28533	46147	5685	54964	5171	40603	30641	14341	3295	30830	12640	28410	11375	4464	14258	31542	33166	17825	34333	30858	25351	43928	68267	9658	25547	13091	37934	46105	48583	41445	21494	29865	14927	3695	10946	20382	14846
4976	264730	198	4976	86:1130.0 89:441.0 90:254.0 91:125.0 92:14.0 93:467.0 94:14.0 96:169.0 97:100.0 100:365.0 104:171.0 106:169.0 107:464.0 108:72.0 110:78.0 114:29.0 116:101.0 118:9.0 120:773.0 121:55.0 122:38.0 124:7.0 125:46.0 126:232.0 128:30.0 130:567.0 131:55.0 133:3192.0 134:818.0 135:177.0 143:3.0 144:30.0 146:29.0 147:54.0 148:106.0 150:25.0 158:217.0 161:1.0 166:9.0 167:8.0 168:25.0 170:178.0 175:1.0 178:6…				994	1138	1413	1683	1662	2018	865	998	1639	1302	1445	2323	565	938	904	2252	2242	1032	1750	863	1972	893	1034	1047	1022	2831	1229	1864	1419	1320	1412	940	2272	1545	1568	1012	1257	3074	1372	1237
4943	249304	121	4943	86:47.0 88:179.0 90:52.0 91:306.0 92:16.0 97:3.0 100:656.0 101:32.0 104:139.0 107:1283.0 108:200.0 109:50.0 110:484.0 116:8.0 121:2593.0 122:215.0 123:233.0 124:4.0 126:22.0 127:427.0 130:2034.0 132:8.0 134:1396.0 135:114.0 143:52.0 144:38.0 153:11.0 154:37.0 156:241.0 164:11.0 171:1274.0 172:77.0 178:16.0 184:21.0 185:47.0 199:716.0 200:82.0 202:67.0 225:9.0 228:248.0 229:22.0 230:4.0 231:4.0 25…				435	1359	535	433	524	613	334	308	659	771	540	344	788	632	953	354	23502	642	1563	616	311	536	794	320	413	567	578	607	270	681	962	944	703	825	538	562	431	404	1178	1455
4930	352780	127	4930	86:43.0 90:52.0 92:84.0 93:4.0 95:15.0 96:525.0 97:526.0 98:122.0 99:4636.0 100:234.0 106:42.0 110:60.0 111:2.0 114:33.0 120:3.0 123:4.0 126:422.0 127:13006.0 128:941.0 131:5.0 133:2.0 134:171.0 137:4.0 139:29.0 140:193.0 149:41.0 151:3.0 153:75.0 167:94.0 170:17.0 177:13.0 181:73.0 193:11.0 195:28.0 207:6.0 211:97.0 227:8.0 276:2.0 285:44.0 299:364.0 300:75.0 301:42.0 312:8.0 314:45.0 316:14.0 3…				3982	3490	3782	3427	4032	2889	3467	3361	3362	3902	3491	3218	2882	3623	3131	2347	3427	3521	3448	3750	3493	3107	3371	2532	3798	3714	4016	3709	3450	3465	3797	3599	3829	3580	3665	3481	3900	3494	1867	3167
4879	878860	233	4879	85:580.0 86:309.0 87:698.0 88:506.0 89:868.0 90:189.0 91:5250.0 92:570.0 93:846.0 94:515.0 95:700.0 96:402.0 97:718.0 98:256.0 99:217.0 100:114.0 101:411.0 102:407.0 103:1119.0 104:335.0 105:4543.0 106:460.0 107:579.0 108:258.0 109:352.0 110:282.0 111:330.0 112:151.0 113:86.0 114:61.0 115:2641.0 116:1036.0 117:1850.0 118:705.0 119:2726.0 120:405.0 121:936.0 122:642.0 123:301.0 124:214.0 125:138.0…				620	522	974	156	125	883	773	870	1283	1000	152	6107	976	1290	159	7169	2830	3683	6823	2073	6638	810	125	836	941	761	1984	1732	6322	1467	129	136	424	1748	158	2894	2603	6937	2974	120
4877	410320	211	4877	86:92.0 88:67.0 89:259.0 90:64.0 91:27.0 93:21.0 98:34.0 101:113.0 103:89.0 104:39.0 105:21.0 106:16.0 107:37.0 108:15.0 109:15.0 110:408.0 111:29.0 115:77.0 119:54.0 121:96.0 123:30.0 130:72.0 131:58.0 132:65.0 133:715.0 134:166.0 135:264.0 136:106.0 137:99.0 138:21.0 139:9.0 140:18.0 143:20.0 146:64.0 148:54.0 151:70.0 152:21.0 153:4.0 155:43.0 158:174.0 159:23.0 165:25.0 167:63.0 168:36.0 172:…				230	225	236	618	274	412	276	206	222	195	482	345	324	499	239	579	239	225	898	244	686	459	822	373	845	245	266	690	678	538	371	211	338	457	278	202	729	583	540	723
4850	614523	333	4850	86:112.0 94:1.0 100:587.0 102:780.0 108:1.0 109:9.0 110:2.0 115:38.0 117:8504.0 118:656.0 119:16.0 121:1.0 122:11.0 125:35.0 130:230.0 131:488.0 132:59.0 140:102.0 141:141.0 143:1195.0 147:2615.0 148:600.0 149:297.0 155:124.0 156:258.0 171:163.0 172:102.0 175:51.0 179:8.0 180:18.0 181:5.0 183:83.0 185:19.0 189:649.0 190:43.0 195:2.0 201:67.0 203:67.0 204:77.0 209:6.0 211:132.0 212:6.0 213:31.0 21…				282	606	359	217	320	214	1567	1468	656	1245	818	1122	939	842	976	914	1526	1323	1435	2246	300	225	509	574	667	877	1166	1303	885	1466	637	616	976	961	538	1954	480	952	2668	1703
4766	618681	204	4766	86:89.0 87:265.0 88:82.0 89:180.0 90:24.0 99:138.0 101:1141.0 102:184.0 103:2236.0 104:190.0 105:196.0 106:46.0 110:125.0 111:11.0 113:10.0 114:278.0 115:48.0 116:1300.0 117:622.0 118:121.0 119:45.0 120:38.0 122:5.0 123:60.0 129:1356.0 130:376.0 131:909.0 132:152.0 133:1343.0 134:137.0 135:177.0 140:21.0 141:163.0 142:6.0 143:664.0 144:232.0 145:182.0 146:238.0 147:4591.0 148:988.0 149:570.0 150:…				9844	14327	4662	2927	4391	33914	13716	20093	27181	18384	9246	6726	20968	7970	41368	91396	18034	39340	210336	45942	5502	6964	6772	3869	1917	14076	32271	14836	19954	12117	22301	10872	6946	8935	2808	25994	16998	25923	68070	76690
4747	693475	447	4747	85:55.0 86:121.0 88:7.0 90:13.0 92:2.0 93:48.0 99:108.0 100:276.0 103:1409.0 104:60.0 105:104.0 110:72.0 116:39.0 117:235.0 119:47.0 121:34.0 122:13.0 123:11.0 126:8.0 127:394.0 129:212.0 130:164.0 131:983.0 132:177.0 133:2381.0 134:52.0 135:75.0 136:1.0 139:17.0 140:38.0 142:39.0 145:66.0 146:97.0 147:5425.0 148:1408.0 149:302.0 151:87.0 153:47.0 156:106.0 157:368.0 158:10.0 159:115.0 160:81.0 1…				636	830	363	487	820	2324	1251	2173	603	1062	1082	2338	1386	693	750	4139	1124	937	7268	1552	1409	693	642	486	487	824	1226	1092	1582	901	1364	558	584	1054	394	509	973	1103	1722	3495
4746	548258	275	4746	85:340.0 86:1019.0 87:118.0 88:57.0 89:5028.0 90:174.0 91:106.0 98:391.0 99:176.0 100:4306.0 101:959.0 102:2212.0 103:1287.0 104:171.0 106:16.0 107:216.0 108:17.0 110:98.0 111:77.0 112:503.0 113:381.0 114:1252.0 115:857.0 116:763.0 117:731.0 119:18.0 120:124.0 121:11.0 125:17.0 126:29.0 127:2389.0 128:3055.0 129:536.0 130:1024.0 131:1606.0 132:502.0 133:1357.0 135:76.0 139:378.0 140:703.0 142:216…				144	275	320	255	252	180	414	406	217	328	426	390	424	524	270	112	315	368	270	555	246	314	394	505	358	283	118	553	159	520	345	211	530	396	372	433	673	186	585	604
4745	612986	217	4745	85:652.0 88:182.0 89:1438.0 92:118.0 93:226.0 95:137.0 99:1068.0 100:280.0 101:1501.0 102:359.0 103:4860.0 104:555.0 105:320.0 107:115.0 108:22.0 109:307.0 110:105.0 111:781.0 112:44.0 113:771.0 114:380.0 115:168.0 117:1883.0 119:57.0 121:80.0 123:37.0 125:395.0 126:175.0 127:225.0 128:443.0 129:5837.0 131:2136.0 132:1.0 133:3521.0 134:1189.0 135:603.0 137:21.0 139:97.0 141:1428.0 142:390.0 143:2…				8796	13659	4964	2800	4740	28930	15274	13759	22857	15476	8301	4623	20409	541	32878	58221	26668	30396	143126	35301	6195	6737	6982	4575	2523	12654	24162	10436	17120	9574	20621	11764	7283	9345	3577	25189	14933	19637	46515	56605
4735	833549	91	4735	86:69.0 89:251.0 91:9588.0 92:729.0 100:159.0 101:188.0 102:104.0 103:1132.0 104:28.0 113:10.0 116:40.0 117:731.0 118:12.0 123:137.0 129:1089.0 131:155.0 133:292.0 135:117.0 139:4.0 142:31.0 143:162.0 144:21.0 145:24.0 147:1641.0 148:241.0 149:11.0 153:52.0 157:48.0 160:25.0 165:13.0 169:245.0 173:346.0 174:263.0 175:12.0 178:18.0 181:48.0 183:4.0 184:10.0 189:645.0 190:109.0 191:362.0 192:21.0 1…				3486	5278	4384	3952	4248	2172	4078	3440	2355	3115	5262	5997	5322	4947	3503	1640	2872	3665	3868	3823	4880	4741	6314	7276	7277	2029	4078	4959	2635	3345	5567	5266	6551	5011	6772	2971	3656	2161	3114	2676
4732	812184	204	4732	91:47.0 101:38.0 103:1234.0 105:3.0 113:1.0 115:220.0 117:184.0 124:6.0 131:11.0 133:12.0 135:2.0 136:43.0 138:2.0 142:50.0 143:140.0 145:2.0 147:47.0 148:1.0 150:2.0 153:12.0 156:215.0 157:41.0 160:37.0 161:9.0 162:3.0 163:21.0 169:155.0 174:3.0 179:44.0 180:15.0 183:1.0 189:100.0 190:15.0 191:273.0 192:144.0 193:4.0 194:17.0 202:6.0 203:46.0 204:4217.0 205:800.0 206:271.0 207:3.0 208:145.0 210:…				1108	1800	1737	1627	2008	826	2048	1884	908	1684	2076	1520	2869	2052	1164	887	1384	1499	1408	2044	2227	1557	2411	3667	3581	1197	1901	1929	1085	1957	1765	2044	1484	1814	3021	1858	1713	834	1837	1747
4729	1071663	204	4729	85:11.0 86:24.0 87:247.0 89:464.0 90:3.0 97:142.0 98:56.0 99:80.0 101:277.0 102:6.0 103:1707.0 109:47.0 111:807.0 112:112.0 113:47.0 115:116.0 116:286.0 117:1034.0 119:131.0 127:59.0 129:2773.0 130:379.0 131:538.0 133:211.0 135:186.0 137:40.0 142:34.0 143:290.0 144:12.0 145:113.0 147:1979.0 148:185.0 149:228.0 151:8.0 154:57.0 155:214.0 157:424.0 158:19.0 159:303.0 160:34.0 162:58.0 163:132.0 164…				268	102	179	111	63	107	596	108	155	80	384	98	112	198	87	99	112	552	142	85	125	122	101	336	110	117	414	620	100	113	108	161	62	109	532	93	106	93	462	119
4725	590229	392	4725	85:259.0 86:1092.0 87:772.0 88:218.0 89:15431.0 90:1160.0 91:838.0 92:244.0 93:79.0 94:39.0 95:70.0 96:554.0 97:170.0 98:767.0 99:702.0 100:1049.0 101:1987.0 102:523.0 103:3737.0 104:275.0 105:1592.0 106:4.0 107:111.0 108:11.0 109:51.0 111:223.0 112:172.0 113:535.0 114:1103.0 115:363.0 116:4896.0 117:1793.0 118:310.0 119:769.0 120:231.0 121:1438.0 122:304.0 123:69.0 124:296.0 125:75.0 126:877.0 1…				1552	1846	3669	1878	2631	1260	4419	3817	1846	3010	3567	4098	3933	4328	3003	905	4519	3949	2312	4426	2702	2992	3739	5296	5256	2251	3916	4389	2930	4320	3162	3283	4892	4568	4962	3828	5370	1949	4081	3210
4716	815363	204	4716	85:77.0 86:140.0 89:384.0 96:17.0 98:73.0 99:66.0 101:781.0 103:4022.0 104:306.0 105:187.0 107:21.0 110:6.0 113:135.0 116:107.0 117:1203.0 122:64.0 123:16.0 124:2.0 125:11.0 127:4.0 128:52.0 129:1442.0 131:555.0 133:504.0 140:58.0 141:26.0 142:251.0 143:284.0 145:34.0 146:22.0 147:4740.0 148:464.0 149:308.0 152:6.0 153:27.0 154:57.0 155:99.0 156:439.0 157:121.0 158:103.0 159:618.0 160:204.0 161:2…				295	314	471	329	414	598	684	1621	635	773	571	868	750	547	1301	552	602	949	1341	991	289	347	524	574	577	626	884	2135	809	1037	607	616	654	802	614	1481	923	455	854	981
4708	511105	306	4708	85:174.0 87:1489.0 88:647.0 89:5277.0 90:140.0 91:125.0 94:97.0 95:50.0 97:888.0 98:173.0 99:465.0 100:6620.0 101:5793.0 102:1307.0 103:9454.0 104:634.0 105:1122.0 106:57.0 109:55.0 111:562.0 112:35.0 113:270.0 115:8385.0 116:14277.0 117:52588.0 118:5938.0 119:3165.0 120:158.0 121:34.0 126:7.0 127:384.0 128:2082.0 129:1507.0 130:268.0 131:5317.0 132:413.0 133:10983.0 134:616.0 135:1132.0 138:2.0 …				18183	43674	42147	39910	38360	32464	85837	94875	29990	89317	67467	62229	91562	66540	67124	37614	64881	77379	67841	123848	36005	41922	52993	74452	82185	51230	78801	92951	47241	94079	45236	57279	83413	82089	51930	104041	98425	53144	123846	75263
4707	883144	361	4707	85:363.0 86:380.0 87:325.0 88:340.0 89:1680.0 90:27.0 91:16.0 94:64.0 95:35.0 97:14.0 98:99.0 99:492.0 100:445.0 101:2490.0 102:597.0 103:10705.0 104:970.0 105:429.0 106:65.0 109:279.0 111:314.0 112:93.0 113:643.0 114:168.0 115:6029.0 116:1863.0 117:17470.0 118:1848.0 119:920.0 125:138.0 127:482.0 128:227.0 129:7861.0 130:5126.0 131:6025.0 132:890.0 133:4020.0 134:464.0 135:342.0 136:16.0 137:1.0…				357	376	328	231	344	148	430	233	432	501	246	246	297	395	408	192	252	391	172	626	212	258	448	526	266	314	300	591	165	454	233	363	135	476	487	596	65	60	387	187
4609	685736	187	4609	85:252.0 86:288.0 87:352.0 88:313.0 89:2755.0 90:353.0 91:214.0 94:31.0 95:79.0 96:89.0 97:4.0 98:62.0 99:290.0 100:1232.0 101:1584.0 102:432.0 103:3261.0 104:361.0 105:285.0 106:49.0 107:147.0 110:254.0 111:238.0 112:329.0 113:84.0 114:873.0 115:598.0 116:523.0 117:3931.0 118:358.0 119:584.0 120:12.0 121:28.0 122:1.0 124:18.0 126:173.0 127:11.0 128:137.0 129:1930.0 130:801.0 131:2126.0 132:317.0…				70	83	115	270	81	257	428	70	148	57	413	62	557	460	339	115	210	333	145	126	314	529	339	269	47	93	439	679	66	508	519	439	529	469	446	484	466	107	547	302
4559	348297	240	4559	86:360.0 87:23.0 88:174.0 92:228.0 99:55.0 103:178.0 105:4.0 106:41.0 107:220.0 110:58.0 115:89.0 117:30.0 120:29.0 129:15.0 130:228.0 133:412.0 134:116.0 135:63.0 137:52.0 146:33.0 147:4780.0 148:765.0 149:415.0 151:9.0 160:13.0 171:89.0 172:14.0 174:20.0 175:1.0 185:1.0 191:6.0 193:103.0 199:9.0 204:20.0 205:19.0 211:175.0 218:15.0 234:11.0 236:1.0 240:1321.0 241:209.0 242:153.0 283:69.0 285:24…				225	629	451	357	456	470	250	506	772	295	230	806	355	476	485	269	651	214	348	169	541	393	602	278	312	433	416	500	193	362	252	497	909	523	517	393	231	601	601	732
4531	271256	262	4531	85:7.0 86:5508.0 87:499.0 89:801.0 90:121.0 91:206.0 92:125.0 93:11.0 95:16.0 99:508.0 100:15843.0 101:2827.0 102:1095.0 103:717.0 104:383.0 105:282.0 107:640.0 108:95.0 109:4.0 110:757.0 111:24.0 112:26.0 113:349.0 114:199.0 115:409.0 116:424.0 117:955.0 118:121.0 119:806.0 120:201.0 121:123.0 122:124.0 124:6.0 127:1289.0 128:157.0 129:65.0 130:1395.0 131:1260.0 132:524.0 133:5124.0 134:1261.0 1…				1159	1081	1411	998	919	440	1124	751	1130	1281	432	893	889	1231	1140	688	259	576	1283	1071	1018	1288	1450	562	1115	600	1142	413	1069	1008	712	751	616	387	1221	1043	352	577	975	1101
3781	948550	191	3781	85:356.0 86:409.0 88:341.0 89:959.0 90:10.0 91:31.0 96:405.0 97:374.0 99:81.0 100:623.0 101:580.0 102:248.0 103:4375.0 104:371.0 105:876.0 107:308.0 109:273.0 110:265.0 111:226.0 113:198.0 114:142.0 115:84.0 116:282.0 117:1524.0 118:156.0 119:86.0 120:64.0 125:47.0 126:222.0 127:532.0 128:116.0 129:4207.0 130:718.0 131:878.0 132:61.0 133:1384.0 134:281.0 135:335.0 136:124.0 139:95.0 140:38.0 141:…				260	941	200	381	285	196	5114	307	241	66	409	211	2170	369	288	725	246	305	996	255	110	285	333	477	498	342	152	276	250	861	417	391	268	1391	394	314	289	183	1110	1389
3618	533919	328	3618	87:20.0 89:1.0 92:25.0 94:22.0 95:84.0 107:87.0 108:118.0 110:164.0 111:17.0 117:87.0 118:5.0 124:58.0 131:257.0 132:81.0 133:329.0 137:50.0 141:25.0 143:377.0 144:50.0 147:729.0 148:390.0 149:143.0 152:16.0 153:15.0 155:5.0 157:104.0 158:36.0 160:41.0 165:13.0 166:163.0 168:1.0 169:31.0 178:29.0 180:78.0 181:124.0 182:214.0 183:78.0 184:131.0 185:93.0 192:5.0 196:54.0 198:90.0 200:16.0 204:1.0 2…				488	2438	2175	762	1228	293	2242	397	388	1233	941	252	1952	2037	1805	149	946	680	327	1848	271	890	1846	1297	2658	1521	730	1013	312	2040	899	1584	2575	1250	1851	1102	1407	261	1282	762
3507	838408	157	3507	85:102.0 99:42.0 101:24.0 103:667.0 111:2.0 112:2.0 114:14.0 116:1.0 117:101.0 127:1.0 128:26.0 129:366.0 130:45.0 133:141.0 141:51.0 143:104.0 147:1420.0 156:60.0 157:1562.0 158:98.0 159:53.0 163:24.0 169:109.0 173:133.0 177:22.0 179:13.0 189:9.0 191:671.0 192:44.0 204:1188.0 205:217.0 206:21.0 207:312.0 209:48.0 217:466.0 218:126.0 220:28.0 221:585.0 222:126.0 223:26.0 233:127.0 253:3.0 259:25.…				240	269	421	248	283	1097	926	3958	1245	1171	541	1350	546	436	4325	807	690	1236	2178	1163	336	301	342	378	438	739	886	5047	1764	1715	497	436	446	886	410	3440	1828	611	2029	2682
3503	503666	120	3503	85:197.0 86:70.0 87:181.0 88:139.0 89:649.0 90:93.0 91:821.0 92:8.0 93:32.0 95:44.0 97:56.0 99:60.0 100:526.0 101:471.0 102:39.0 103:2146.0 104:57.0 105:38.0 107:4.0 108:21.0 110:339.0 111:16.0 112:61.0 113:383.0 114:62.0 115:102.0 117:1460.0 118:416.0 119:174.0 120:3234.0 121:186.0 125:19.0 127:384.0 128:28.0 129:800.0 130:706.0 131:347.0 132:97.0 133:726.0 135:41.0 140:89.0 141:10.0 142:25.0 14…				3274	5310	6129	2313	8119	1406	780	10090	2867	2598	9205	6130	13690	15738	7021	6396	5718	3394	4743	6593	3314	3494	7943	4972	3846	4543	3385	3245	217	3241	4346	5699	14724	2639	4814	4759	16687	3008	3577	11483
3423	583908	217	3423	89:439.0 90:69.0 95:6.0 98:91.0 99:55.0 100:4.0 101:228.0 103:1014.0 104:3.0 105:26.0 110:90.0 111:67.0 113:75.0 116:33.0 117:3371.0 118:362.0 119:52.0 127:76.0 129:901.0 130:156.0 131:370.0 132:30.0 133:856.0 134:294.0 141:52.0 142:9.0 143:367.0 145:6.0 146:42.0 147:8778.0 148:1352.0 149:913.0 150:42.0 151:37.0 157:320.0 160:82.0 163:71.0 164:17.0 169:4.0 170:4.0 171:61.0 177:37.0 184:55.0 189:8…				1556	3162	3123	2570	2427	2485	8392	7022	3023	5972	3902	3651	5211	4307	5269	2423	4251	7047	6374	8129	2827	2743	3579	5142	5369	3883	5857	7272	3490	6571	3163	3944	4870	5078	4130	6374	6331	3525	7985	6499
3381	668513	244	3381	85:1300.0 86:1480.0 88:1091.0 89:23537.0 90:2501.0 91:1119.0 92:374.0 93:33.0 94:106.0 95:19.0 96:497.0 97:526.0 98:1068.0 99:1422.0 100:2845.0 101:5222.0 102:1491.0 103:8993.0 104:836.0 105:1201.0 106:172.0 107:571.0 110:386.0 111:2265.0 112:2241.0 113:919.0 114:471.0 115:2031.0 116:2833.0 117:46518.0 118:4638.0 119:3219.0 121:86.0 122:225.0 123:118.0 124:104.0 125:664.0 126:4653.0 127:347.0 128…				1028	703	2837	1809	2232	834	3078	3008	1141	1893	1723	1684	2245	1581	1587	492	1477	1921	2024	2633	1802	1445	2005	3101	3414	1327	2163	2701	1586	1715	1807	1073	623	2580	2470	1730	1698	982	2282	2057
3365	952935	348	3365	85:265.0 87:293.0 89:238.0 91:162.0 93:92.0 94:14.0 96:140.0 97:1778.0 98:175.0 99:209.0 100:45.0 101:1697.0 102:134.0 103:5276.0 104:472.0 105:555.0 106:82.0 107:179.0 108:6.0 109:27.0 111:134.0 113:86.0 114:77.0 115:1375.0 116:809.0 117:829.0 118:102.0 119:196.0 120:48.0 121:26.0 125:4.0 127:590.0 128:58.0 129:4364.0 130:401.0 131:976.0 132:111.0 133:1586.0 134:296.0 135:1032.0 136:60.0 137:140…				1034	2203	1291	1620	1795	220	633	864	319	613	2752	2051	2254	2052	770	354	607	562	513	482	1371	1249	673	2968	2853	336	763	1178	349	673	1941	1942	2454	1736	1936	615	857	451	557	599
3295	382620	196	3295	85:81.0 86:42.0 90:9.0 92:18.0 93:5.0 95:455.0 96:36.0 99:8.0 100:22.0 102:9.0 103:413.0 104:5.0 107:633.0 109:38.0 110:165.0 116:2.0 117:52.0 118:53.0 120:2.0 121:2.0 122:144.0 124:3.0 125:161.0 126:82.0 128:37.0 129:85.0 130:429.0 133:1.0 136:13.0 137:11.0 141:7.0 145:18.0 147:51.0 149:6.0 150:86.0 152:1.0 154:16.0 158:7.0 168:32.0 169:3.0 171:1.0 175:2.0 180:3.0 181:4.0 184:3.0 185:22.0 187:9.…				1357	1284	1720	1240	1617	743	1312	792	1783	1741	2389	1407	2665	2604	2061	575	2572	2235	1057	2219	1082	2207	2127	2073	1719	2082	2069	2276	926	1806	2429	2227	2250	2157	2247	2170	2303	1089	2149	1944
3286	275568	85	3286	85:25854.0 86:882.0 90:115.0 91:57.0 92:118.0 94:117.0 95:267.0 96:1220.0 97:476.0 98:107.0 99:24.0 100:38.0 102:3.0 106:182.0 107:1143.0 108:104.0 109:124.0 110:331.0 111:54.0 114:342.0 115:45.0 117:136.0 118:200.0 126:755.0 127:1535.0 128:63.0 129:1308.0 130:903.0 134:196.0 135:83.0 136:55.0 139:15.0 142:1.0 146:87.0 150:102.0 152:293.0 154:331.0 165:117.0 167:40.0 185:71.0 196:423.0 197:14.0 1…				15117	15664	16300	13796	18427	19756	18922	19925	16087	14710	16959	14625	19521	19368	19637	16329	14882	15663	15772	15887	13626	14466	17378	17412	15693	15494	15761	13881	17198	14972	14199	16798	17364	14346	12781	15706	17977	16144	14720	13906
3253	835625	204	3253	99:3.0 101:43.0 103:309.0 107:238.0 110:28.0 113:76.0 118:121.0 128:10.0 129:250.0 130:63.0 134:239.0 140:17.0 143:78.0 148:406.0 155:4.0 156:44.0 157:724.0 158:69.0 163:16.0 169:68.0 173:64.0 174:164.0 189:94.0 191:278.0 193:12.0 199:9.0 204:1906.0 205:335.0 206:175.0 216:14.0 217:519.0 218:116.0 221:10.0 231:2.0 243:5.0 259:11.0 261:9.0 263:18.0 273:3.0 285:4.0 295:7.0 305:29.0 312:12.0 320:24.…				2032	3317	2750	2241	2877	4740	3803	20158	5460	7015	589	5596	3582	2996	17736	4859	3483	5449	10568	5084	3141	2758	3871	4464	4259	3869	5007	23425	10307	8385	3466	3139	3961	3452	4131	16816	8744	1561	12057	14828
3246	893905	267	3246	85:386.0 87:62.0 89:284.0 90:84.0 91:368.0 92:340.0 95:12.0 99:274.0 100:161.0 101:597.0 102:70.0 103:3695.0 104:443.0 105:215.0 107:228.0 109:236.0 110:64.0 111:125.0 112:21.0 113:265.0 114:31.0 115:206.0 116:206.0 117:1659.0 118:88.0 119:164.0 120:554.0 121:362.0 128:7.0 129:4077.0 130:279.0 131:1053.0 132:56.0 133:1487.0 134:178.0 135:849.0 136:136.0 137:22.0 139:134.0 140:68.0 141:95.0 142:14…				587	2094	816	1315	804	197	308	422	243	539	1937	1048	1717	1290	564	198	287	276	344	236	1289	482	1905	2149	2043	269	158	255	227	238	535	1167	2052	1540	716	363	513	216	327	333
3232	952057	204	3232	85:22.0 86:82.0 87:169.0 89:720.0 90:3.0 95:73.0 96:9.0 97:123.0 99:52.0 100:55.0 101:635.0 102:95.0 103:2414.0 104:170.0 105:312.0 108:27.0 109:5.0 111:91.0 113:76.0 114:117.0 115:161.0 116:221.0 117:1229.0 118:172.0 127:31.0 128:11.0 129:2262.0 130:299.0 131:581.0 133:772.0 135:60.0 142:53.0 143:399.0 144:74.0 147:2017.0 148:508.0 149:473.0 153:67.0 154:5.0 155:144.0 157:355.0 158:9.0 159:99.0 …				1073	1664	1604	1276	1537	452	4374	753	930	1866	2427	252	1422	680	1151	332	1590	2083	2084	2616	1938	1482	2448	2985	1353	1142	2020	2318	986	1648	1963	2019	3170	1168	202	2123	2524	1149	2718	1306
3229	840703	204	3229	85:64.0 86:19.0 87:39.0 89:23.0 93:99.0 98:13.0 99:35.0 100:4.0 101:281.0 102:3.0 103:506.0 113:6.0 116:119.0 117:644.0 129:88.0 130:4.0 131:117.0 133:30.0 137:6.0 140:6.0 141:11.0 142:15.0 143:157.0 144:18.0 147:990.0 151:18.0 154:23.0 157:106.0 158:58.0 159:427.0 160:37.0 161:153.0 165:22.0 168:18.0 169:63.0 172:22.0 178:3.0 187:7.0 189:143.0 190:19.0 191:209.0 192:37.0 194:9.0 203:27.0 204:276…				524	918	921	705	688	480	843	1225	689	798	967	909	1008	795	889	450	822	802	755	653	1110	989	1251	1666	1552	666	782	997	685	891	854	1018	1086	1004	1461	685	788	598	915	823
3206	1000105	129	3206	85:91.0 95:17.0 97:22.0 99:73.0 101:325.0 103:2605.0 104:170.0 105:28.0 109:197.0 111:58.0 112:12.0 113:82.0 114:15.0 115:17.0 116:261.0 117:503.0 119:37.0 129:3763.0 130:280.0 131:453.0 132:205.0 133:793.0 134:160.0 135:115.0 140:7.0 141:15.0 142:150.0 143:690.0 144:82.0 145:182.0 147:3286.0 148:315.0 149:435.0 151:44.0 153:7.0 154:132.0 155:217.0 156:54.0 157:298.0 158:37.0 161:52.0 163:119.0 1…				1367	2320	2410	1830	1607	2296	4446	6772	1880	3975	3094	8302	2847	2811	3685	2748	4452	5472	1003	5148	2976	1983	2210	2612	2409	2756	4460	6847	4272	4691	2747	2339	3839	4492	2292	5281	5077	5864	1674	3338
3205	641417	275	3205	85:945.0 87:63.0 88:75.0 89:3093.0 90:327.0 99:803.0 101:397.0 102:260.0 104:32.0 111:10.0 113:869.0 115:85.0 116:1417.0 117:2593.0 118:412.0 119:74.0 129:1937.0 130:316.0 131:2858.0 132:249.0 133:2052.0 134:381.0 135:144.0 139:29.0 143:811.0 144:130.0 145:100.0 146:602.0 147:9310.0 148:1405.0 149:689.0 153:64.0 154:57.0 155:23.0 157:2947.0 158:308.0 159:1346.0 160:135.0 161:105.0 163:564.0 164:7…				700	1438	1253	1149	1051	699	1931	1974	800	1485	1149	1226	1794	1537	1518	633	1178	1477	1690	1850	1029	661	1569	2033	2026	805	1975	2040	970	2128	1019	1064	1688	1737	1550	1483	1392	705	1736	1685
3185	869802	204	3185	85:115.0 86:48.0 89:25.0 96:61.0 99:102.0 101:338.0 103:1421.0 104:66.0 105:595.0 106:5.0 109:105.0 110:90.0 111:120.0 113:45.0 115:297.0 116:172.0 117:1326.0 118:71.0 119:19.0 124:12.0 127:107.0 129:1926.0 130:302.0 131:305.0 133:571.0 135:17.0 139:6.0 141:67.0 142:52.0 143:483.0 144:307.0 145:46.0 147:3007.0 148:123.0 149:244.0 150:54.0 155:406.0 157:668.0 158:36.0 159:90.0 161:20.0 163:80.0 16…				2299	3443	3265	2024	2565	2769	6045	5274	3470	4581	4255	3954	5168	3812	6096	2216	4738	6635	5020	7184	2365	3159	1985	3997	2768	3554	5061	7231	3478	6054	4464	3819	4969	5113	3949	5673	6894	2910	6149	6377
3182	864701	204	3182	85:60.0 88:2.0 89:101.0 90:26.0 91:76.0 92:14.0 99:38.0 101:601.0 103:1037.0 104:1.0 108:28.0 109:44.0 110:154.0 111:36.0 113:21.0 115:98.0 116:308.0 117:1222.0 118:58.0 122:5.0 126:26.0 127:8.0 129:1248.0 131:179.0 133:352.0 134:265.0 139:2.0 141:3.0 142:41.0 143:353.0 144:29.0 147:2041.0 148:334.0 149:300.0 152:18.0 155:86.0 157:221.0 158:59.0 167:7.0 168:5.0 169:341.0 170:70.0 171:53.0 172:45.…				8657	15449	14828	12157	12659	5913	14383	16647	7646	14157	18763	16020	26393	18392	10036	9712	17466	20167	17362	22328	15159	13384	16532	25171	23561	9002	17707	14295	9240	15084	15304	17627	1583	19956	21805	22445	22242	13983	22190	20254
3161	756161	204	3161	85:7877.0 86:1956.0 87:12708.0 88:4005.0 89:22913.0 90:2366.0 91:1622.0 92:351.0 93:277.0 94:699.0 95:1464.0 96:351.0 97:3427.0 98:1243.0 99:9190.0 100:1529.0 101:39623.0 102:6960.0 103:113537.0 104:11023.0 105:7035.0 106:377.0 107:68.0 108:234.0 109:4309.0 110:217.0 111:6158.0 112:875.0 113:10413.0 114:2040.0 115:22221.0 116:18861.0 117:131355.0 118:14132.0 119:12625.0 120:1067.0 121:793.0 122:2…				1003	1471	1526	1208	1636	1223	2885	2952	1408	2116	2228	1927	2443	2088	2300	1047	1996	3057	2462	2796	1720	1576	1962	2605	2627	1685	2414	3079	1737	2294	558	2649	2245	1631	2329	3115	2562	1296	3572	1434
3143	459926	155	3143	88:126.0 100:234.0 103:134.0 105:27.0 110:51.0 112:72.0 126:44.0 133:135.0 139:377.0 147:1501.0 155:3104.0 177:18.0 202:16.0 205:20.0 206:18.0 231:22.0 239:27.0 390:12.0 397:13.0 440:18.0 443:20.0 455:23.0 477:17.0				564	478	509	503	310	306	291	304	556	357	969	767	241	465	334	153	1642	771	461	1183	376	840	432	597	507	742	459	1103	262	523	635	429	797	1181	618	1075	909	459	1582	1014
3122	654564	205	3122	88:42.0 89:878.0 90:72.0 92:33.0 95:32.0 98:42.0 100:124.0 101:638.0 103:854.0 104:34.0 105:326.0 106:118.0 114:167.0 115:232.0 116:157.0 117:1442.0 118:149.0 119:163.0 120:29.0 127:75.0 129:950.0 130:309.0 131:342.0 133:922.0 134:179.0 135:121.0 136:66.0 137:34.0 141:25.0 142:101.0 143:240.0 144:49.0 145:109.0 147:3705.0 148:221.0 149:381.0 150:95.0 154:25.0 157:315.0 158:130.0 159:63.0 160:442.…				6281	9241	12042	4685	7888	6146	28634	14832	9285	10870	17448	19494	23452	46384	17839	5507	19679	18094	16935	22070	17944	12932	13391	16245	8876	8606	21197	24326	11217	16490	16149	15720	25403	20073	18764	26216	24132	8461	28712	19495
3029	605198	223	3029	85:1116.0 86:185.0 87:101.0 88:159.0 89:276.0 91:1571.0 92:139.0 93:1385.0 94:86.0 95:916.0 96:6.0 97:258.0 98:12.0 99:117.0 101:478.0 102:166.0 103:1545.0 104:182.0 105:989.0 106:71.0 107:1562.0 108:87.0 109:906.0 110:49.0 111:464.0 113:4.0 115:150.0 116:128.0 117:7251.0 118:815.0 119:900.0 120:26.0 121:668.0 122:46.0 123:952.0 124:18.0 125:149.0 126:173.0 128:337.0 130:165.0 131:590.0 132:5.0 1…				916	756	921	435	667	389	430	508	462	582	761	409	772	554	514	201	516	518	183	968	348	487	600	579	612	1001	758	619	127	637	422	1364	793	369	1145	563	933	398	647	357
2551	707929	223	2551	85:288.0 87:138.0 88:93.0 89:118.0 91:292.0 93:255.0 95:189.0 101:321.0 103:730.0 105:204.0 106:89.0 107:446.0 109:371.0 110:78.0 111:6.0 115:16.0 117:2831.0 118:176.0 119:181.0 121:206.0 123:121.0 125:1.0 129:34.0 130:86.0 133:162.0 135:453.0 139:54.0 147:324.0 151:23.0 157:58.0 161:933.0 162:63.0 167:232.0 169:42.0 173:111.0 179:80.0 181:316.0 183:124.0 184:26.0 191:64.0 195:35.0 197:30.0 211:1…				514	280	320	192	236	282	565	246	114	358	404	170	101	147	105	83	821	209	155	629	114	149	150	161	194	574	467	96	74	216	137	1217	336	180	647	205	442	218	257	135
2075	297085	174	2075	85:377.0 86:5133.0 87:581.0 89:355.0 94:69.0 96:78.0 99:94.0 100:2602.0 101:720.0 102:248.0 103:321.0 111:175.0 113:174.0 114:219.0 117:233.0 120:25.0 126:45.0 129:136.0 130:697.0 131:228.0 139:23.0 140:53.0 142:1287.0 143:179.0 144:190.0 156:43.0 158:165.0 159:77.0 160:68.0 161:25.0 170:35.0 172:65.0 173:32.0 174:5694.0 175:985.0 176:425.0 179:34.0 185:21.0 202:24.0 216:575.0 217:117.0 218:74.0 …				295	396	334	523	295	188	725	290	374	785	508	249	346	334	601	195	772	691	277	756	455	579	364	553	953	415	880	1710	267	1188	402	351	437	632	276	420	897	258	783	663
1981	422675	103	1981	87:36.0 94:11.0 99:55.0 101:101.0 102:156.0 103:8936.0 104:810.0 105:257.0 107:9.0 110:127.0 111:11.0 112:49.0 113:29.0 114:67.0 118:68.0 119:49.0 122:8.0 123:22.0 127:6.0 128:8.0 129:1123.0 130:142.0 131:348.0 132:5.0 133:377.0 136:4.0 144:2.0 147:2152.0 148:60.0 149:259.0 150:38.0 151:3.0 156:62.0 161:22.0 162:14.0 175:54.0 176:30.0 177:139.0 182:4.0 183:60.0 184:5.0 185:4.0 186:51.0 187:20.0 1…				588	1148	1222	1187	1311	973	2048	2034	748	1454	2041	2253	2448	1746	1534	1331	2158	1404	1897	3861	836	1075	1348	1767	2459	1353	2117	2101	1639	2189	1429	1689	2290	1872	1210	2954	4163	1177	4549	3457
1912	855692	187	1912	85:180.0 86:23.0 87:21.0 89:18.0 90:39.0 91:459.0 93:104.0 95:445.0 97:1079.0 98:28.0 99:1.0 101:190.0 103:776.0 104:17.0 105:16.0 107:51.0 109:128.0 110:2.0 111:168.0 113:51.0 114:1.0 115:63.0 116:37.0 121:33.0 123:130.0 129:653.0 130:46.0 131:2858.0 132:388.0 133:100.0 135:11.0 136:5.0 138:1.0 141:12.0 144:15.0 149:421.0 150:49.0 158:15.0 160:1.0 163:147.0 165:29.0 167:1.0 168:3.0 170:3.0 171:2…				1300	806	880	988	553	882	548	693	946	916	799	714	804	751	877	896	401	712	707	738	1142	1111	940	936	849	956	541	564	765	809	763	851	1153	859	928	1241	665	866	1091	1084
1862	219219	174	1862	86:2133.0 87:406.0 88:54.0 89:68.0 90:65.0 91:345.0 92:31.0 93:88.0 95:13.0 96:12.0 100:5423.0 101:437.0 102:484.0 103:356.0 105:2.0 108:26.0 109:1.0 110:70.0 112:24.0 114:79.0 115:12.0 116:345.0 118:33.0 119:29.0 125:1.0 128:169.0 130:20169.0 131:2229.0 132:724.0 134:128.0 135:50.0 142:37.0 144:419.0 145:66.0 146:255.0 150:92.0 151:506.0 152:40.0 153:34.0 157:13.0 158:18.0 160:39.0 161:3.0 162:5…				3049	2603	2753	3039	2963	3503	2663	3310	2676	2336	2584	2655	2562	2673	2814	3044	2618	2830	2880	2739	2107	2835	2150	2756	3027	875	2771	2680	2626	2808	2503	2438	1219	2999	2631	2508	2737	2815	3004	1657
1805	598397	299	1805	85:215.0 87:64.0 89:492.0 90:30.0 92:68.0 93:67.0 94:4.0 98:12.0 99:273.0 100:214.0 101:2038.0 102:1333.0 103:1933.0 104:253.0 105:91.0 106:14.0 107:29.0 109:11.0 110:52.0 113:19.0 114:1.0 115:681.0 116:1242.0 117:593.0 119:403.0 120:88.0 121:217.0 123:35.0 129:412.0 130:391.0 131:24.0 132:146.0 133:4185.0 134:197.0 135:1468.0 136:69.0 137:389.0 138:11.0 140:4.0 142:83.0 143:2258.0 144:285.0 145:…				413	306	458	245	514	290	84	441	435	479	559	498	554	495	372	112	329	487	128	625	560	609	765	625	566	384	508	575	383	431	468	586	568	605	603	731	718	294	230	237
1753	795138	290	1753	85:57.0 87:36.0 88:28.0 89:1090.0 90:99.0 98:114.0 99:108.0 101:508.0 103:2355.0 104:196.0 105:13.0 111:12.0 112:25.0 113:58.0 114:60.0 115:68.0 116:88.0 117:1377.0 118:71.0 119:5.0 125:1.0 126:244.0 128:69.0 129:1132.0 130:88.0 131:83.0 132:14.0 133:3844.0 134:419.0 135:90.0 139:2.0 140:34.0 141:11.0 142:98.0 143:170.0 144:67.0 145:62.0 146:63.0 147:5341.0 148:971.0 149:526.0 151:34.0 154:11.0 1…				390	609	542	447	656	504	1578	1513	616	1199	1087	1587	1261	537	1036	443	1539	1608	829	2405	638	410	670	975	953	676	1520	1779	764	1605	786	772	1580	1585	836	2429	2138	960	2383	1309
1709	315703	212	1709	85:233.0 86:8.0 87:103.0 89:24.0 90:17.0 91:131.0 92:39.0 93:152.0 94:83.0 95:1.0 96:13.0 97:10.0 98:451.0 99:283.0 100:138.0 101:71.0 102:46.0 104:48.0 107:919.0 109:56.0 110:251.0 111:83.0 112:58.0 113:44.0 114:195.0 115:8.0 116:10.0 117:123.0 119:95.0 120:136.0 122:3939.0 123:366.0 124:535.0 125:134.0 126:27.0 127:274.0 130:49.0 131:105.0 132:81.0 133:153.0 134:531.0 135:75.0 136:60.0 137:3.0 …				781	826	802	896	889	851	694	876	801	848	745	817	708	780	733	781	806	692	754	839	838	632	715	843	931	272	722	898	962	881	549	592	870	885	900	817	512	928	820	762
1704	505341	223	1704	85:698.0 86:242.0 89:124.0 91:1848.0 92:177.0 93:1276.0 94:67.0 95:381.0 97:527.0 98:76.0 99:130.0 100:77.0 101:280.0 103:1026.0 104:52.0 105:1859.0 106:69.0 107:989.0 109:695.0 110:242.0 111:90.0 112:36.0 113:121.0 114:24.0 115:803.0 116:104.0 117:8561.0 118:921.0 119:1118.0 121:401.0 122:41.0 123:1164.0 124:161.0 125:789.0 127:97.0 128:110.0 130:619.0 131:1895.0 132:82.0 133:3913.0 134:621.0 13…				2610	1795	1097	973	1523	962	1721	868	1409	1183	1764	1129	959	1540	1601	811	2375	1211	1124	1726	989	896	1391	737	1278	2312	1933	1132	645	1495	1139	3529	1490	826	2266	802	1898	1128	805	257
1684	743774	262	1684	85:4327.0 86:2186.0 87:3461.0 88:2118.0 89:32761.0 90:2625.0 91:1533.0 92:170.0 93:407.0 94:368.0 95:624.0 96:729.0 97:2507.0 98:1747.0 99:1982.0 100:6529.0 101:7703.0 102:2830.0 103:88682.0 104:8750.0 105:10214.0 106:883.0 107:193.0 108:349.0 109:388.0 110:1104.0 111:1111.0 112:417.0 113:2639.0 114:28715.0 115:5538.0 116:5143.0 117:46121.0 118:4935.0 119:5857.0 120:563.0 121:271.0 122:71.0 123:1…				180	155	146	227	326	104	1237	386	200	497	489	284	285	203	283	254	101	527	703	203	269	370	222	537	460	179	538	556	304	610	286	187	303	637	224	480	249	105	406	366
1673	540033	217	1673	85:574.0 87:170.0 88:5.0 89:741.0 92:86.0 95:107.0 96:86.0 97:1417.0 98:79.0 99:841.0 101:4672.0 102:364.0 103:4626.0 104:481.0 105:338.0 106:10.0 109:151.0 110:200.0 111:535.0 112:104.0 113:401.0 114:112.0 115:1096.0 116:3061.0 117:3411.0 118:607.0 119:438.0 125:36.0 128:85.0 129:6528.0 130:698.0 131:2573.0 133:7145.0 134:174.0 135:1000.0 140:160.0 141:374.0 142:172.0 143:2551.0 144:304.0 145:33…				448	801	674	464	689	701	1680	1381	782	1283	943	1080	1359	1105	1564	855	1520	1772	1888	1800	642	575	845	901	826	828	1576	1530	685	1330	977	969	998	1082	859	1268	1578	762	2315	1507
1064	594945	117	1064	85:2612.0 86:2545.0 87:45733.0 88:44013.0 89:24434.0 90:2017.0 91:921.0 92:316.0 93:118.0 94:54.0 96:90.0 97:224.0 98:50.0 99:2686.0 100:561.0 101:102529.0 102:14514.0 103:177816.0 104:15569.0 105:12095.0 106:376.0 107:279.0 111:97.0 112:59.0 113:42.0 114:436.0 115:8036.0 116:197720.0 117:393165.0 118:47689.0 119:23184.0 120:1128.0 121:155.0 127:44.0 129:270.0 130:264.0 131:5599.0 132:1056.0 133:…				2672	3353	3194	4789	2158	5105	2682	5615	2509	1837	2012	5175	3358	700	3631	7703	4319	4487	4503	4253	6712	3726	2450	4943	6272	3078	2978	5656	6571	5651	2064	2862	3961	7611	3831	3396	1317	5455	3779	8211
1029	220340	85	1029	85:9163.0 86:445.0 90:20.0 91:64.0 93:19.0 97:49.0 98:534.0 99:746.0 102:20.0 106:25.0 108:19.0 111:69.0 112:442.0 113:885.0 120:34.0 123:14.0 126:184.0 127:514.0 128:77.0 138:13.0 139:15.0 148:32.0 156:25.0 170:66.0 180:15.0 181:13.0 315:16.0 334:29.0 467:19.0 486:16.0				2804	2007	2308	2665	2656	1749	1751	1596	1634	2139	2193	2587	1769	1842	1975	2085	2231	2096	2143	1912	2280	2359	1716	2152	2084	2618	2408	2530	2206	2271	2383	2344	2727	2559	2053	1683	2183	2433	2115	1843
892	478262	155	892	88:22.0 91:174.0 106:42.0 121:190.0 123:202.0 124:35.0 125:104.0 137:66.0 138:70.0 139:149.0 153:176.0 155:4152.0 156:191.0 157:122.0 171:1500.0 172:118.0 173:23.0 175:19.0 181:32.0 197:80.0 199:33.0 227:179.0 397:19.0 430:27.0 474:19.0 492:19.0				574	641	602	5457	761	1221	1011	2998	623	578	2661	4832	685	2486	839	1461	629	793	7805	526	1328	2167	6585	910	6220	583	694	3062	2557	1482	700	522	2698	2543	2138	553	1293	4114	1385	3375
657	227730	173	657	87:417.0 88:1864.0 89:109.0 99:135.0 100:41.0 101:551.0 103:1932.0 105:276.0 111:31.0 113:33.0 115:442.0 116:875.0 117:3523.0 129:942.0 131:2798.0 132:1334.0 133:3612.0 136:163.0 143:5278.0 144:752.0 145:830.0 147:27963.0 148:4490.0 149:3045.0 150:198.0 154:19.0 158:607.0 161:678.0 163:17.0 173:2865.0 174:305.0 177:2192.0 178:399.0 201:8.0 203:14.0 205:915.0 207:67.0 223:25.0 231:19.0 236:20.0 27…				1542	962	8404	3930	4794	3262	4613	605	4632	2344	2172	8701	4277	1248	3925	899	2752	2477	6734	3829	803	4543	1226	1597	5307	1253	3235	3066	6490	2842	3989	7757	1983	4625	7805	4099	3306	9896	3640	3272
490	336870	157	490	85:2262.0 86:2138.0 87:620.0 88:186.0 89:252.0 90:218.0 91:299.0 93:109.0 94:45.0 96:100.0 97:442.0 98:168.0 100:3279.0 101:348.0 102:269.0 103:54.0 104:438.0 108:68.0 110:265.0 112:93.0 113:757.0 114:373.0 115:471.0 118:175.0 120:1984.0 121:189.0 122:104.0 125:69.0 126:172.0 129:115.0 134:1216.0 143:322.0 156:41.0 157:19543.0 158:2084.0 159:638.0 161:256.0 170:462.0 175:47.0 184:891.0 185:77.0 1…				364	7437	5026	6251	2175	3359	3176	2283	4395	5378	4028	4115	2016	2887	3191	2213	5309	2388	4351	3594	4869	5117	5404	3459	4976	5643	5372	5212	2190	5889	4057	3150	5048	2280	7828	3477	4388	4251	5553	6301
469	380189	110	469	85:12203.0 86:706.0 89:10015.0 90:815.0 91:1001.0 92:336.0 96:79.0 98:511.0 99:796.0 100:546.0 101:3043.0 102:347.0 103:2033.0 104:364.0 105:171.0 107:445.0 110:22905.0 111:1093.0 114:24.0 116:3099.0 117:364.0 118:125.0 119:1291.0 120:129.0 121:40.0 123:11.0 127:111.0 128:446.0 132:67.0 133:106.0 134:1207.0 135:167.0 136:170.0 138:36.0 144:216.0 145:79.0 146:119.0 150:52.0 151:11.0 152:254.0 153:…				2271	636	1588	2866	2118	1319	1673	2123	2151	2597	2069	2451	2016	1872	2039	1553	1838	1906	2016	720	944	2535	1660	2397	1567	2195	2603	2414	1996	1689	2103	1151	2206	1806	1195	850	1999	777	2797	1308
462	341008	259	462	85:367.0 86:221.0 87:648.0 88:316.0 91:91.0 93:212.0 96:45.0 97:58.0 100:2171.0 101:616.0 102:524.0 103:211.0 104:216.0 111:117.0 113:83.0 115:374.0 117:2314.0 119:250.0 120:599.0 121:1913.0 122:125.0 123:73.0 124:29.0 127:788.0 131:2048.0 133:1103.0 137:183.0 138:30.0 139:27.0 144:3295.0 145:263.0 146:160.0 147:20266.0 148:3207.0 149:1369.0 150:146.0 151:2028.0 152:196.0 153:87.0 158:36.0 163:59…				848	668	135	882	879	651	709	219	92	905	690	676	807	772	440	614	801	615	675	196	544	178	743	865	878	814	1010	781	623	897	674	761	734	795	871	755	761	93	71	533
453	280176	86	453	85:2866.0 86:48433.0 87:4176.0 89:655.0 91:1047.0 92:155.0 95:67.0 96:510.0 97:153.0 98:109.0 99:175.0 101:162.0 102:486.0 103:1914.0 104:760.0 105:393.0 106:217.0 114:153.0 116:224.0 118:384.0 121:58.0 126:283.0 128:481.0 129:854.0 130:913.0 131:625.0 132:367.0 142:316.0 144:105.0 146:2081.0 151:48.0 152:30.0 153:64.0 158:64.0 159:53.0 160:86.0 161:68.0 165:900.0 166:125.0 170:1061.0 171:585.0 1…				1819	4654	4635	2865	8646	3199	11662	14452	2493	4469	8154	7581	15842	15656	9643	4971	8829	6106	7594	16559	2610	2850	6290	9384	6911	4861	6239	11582	8551	9696	4707	5505	9398	4932	3813	8807	19341	3113	9949	10630
443	222093	131	443	86:1425.0 87:2961.0 88:5770.0 89:2441.0 90:1430.0 91:4511.0 92:1213.0 93:421.0 94:143.0 95:226.0 96:1286.0 97:3966.0 98:3381.0 99:2596.0 100:9641.0 101:5658.0 102:1755.0 104:2561.0 105:449.0 106:1511.0 107:4742.0 108:20682.0 109:1475.0 110:117572.0 111:4368.0 112:315.0 113:590.0 114:732.0 115:72654.0 116:9082.0 117:4201.0 118:7185.0 119:1302.0 120:891.0 121:1057.0 122:123.0 124:139.0 126:1739.0 1…				59497	53214	57394	49026	55439	56911	52301	52543	54523	53608	52540	57771	52013	50683	51731	58745	51235	53324	57782	53591	54753	57755	51659	53556	57805	41527	54209	55141	56847	54546	54888	55228	57606	57084	51985	53081	52763	58797	53404	52853
137	246162	204	137	85:280.0 86:863.0 87:415.0 88:205.0 90:120.0 100:239.0 101:103.0 102:415.0 103:1190.0 105:99.0 106:155.0 107:58.0 111:67.0 115:161.0 117:977.0 118:268.0 131:1230.0 132:256.0 133:749.0 136:65.0 143:24.0 147:26816.0 148:4288.0 149:1504.0 150:101.0 155:33.0 160:86.0 175:26.0 180:26.0 184:362.0 188:78.0 190:187.0 191:61.0 194:26.0 195:32.0 200:35.0 202:28.0 204:4031.0 205:466.0 206:177.0 219:180.0 22…				5208	4849	4582	6448	5494	6535	5639	4577	5756	4896	6209	4092	4920	4407	4640	4228	4946	3803	4706	5012	4385	4372	3841	4432	6913	4669	5969	6032	4038	6015	4718	3472	4122	5257	4608	4359	4416	4698	3521	4624
136	579727	227	136	86:209.0 88:93.0 89:59.0 90:84.0 93:64.0 94:45.0 95:43.0 97:123.0 98:225.0 99:147.0 100:1422.0 101:387.0 102:275.0 103:478.0 104:39.0 105:55.0 108:51.0 112:581.0 113:440.0 114:553.0 115:610.0 116:284.0 117:434.0 118:102.0 121:47.0 123:37.0 124:40.0 126:1248.0 128:2895.0 129:741.0 130:428.0 131:1153.0 132:544.0 133:1192.0 134:164.0 135:109.0 136:58.0 137:24.0 138:46.0 139:1218.0 140:219.0 141:63.0…				7200	5390	18838	5528	9142	4252	32775	50906	14413	25325	15995	48505	24342	2004	3950	14799	14119	27391	55046	91602	31566	8684	4807	28106	38553	12635	34025	47906	23616	41611	33460	18589	25580	39574	16669	42821	21974	11069	74298	58449
134	974612	144	134	85:237.0 86:225.0 87:113.0 88:41.0 89:284.0 90:393.0 91:763.0 93:164.0 94:84.0 95:422.0 96:237.0 97:485.0 98:119.0 99:130.0 100:663.0 101:162.0 102:103.0 109:156.0 110:90.0 113:9.0 114:89.0 115:1137.0 116:5754.0 117:448.0 118:166.0 119:94.0 123:111.0 124:65.0 125:23.0 126:73.0 127:120.0 128:4434.0 129:482.0 130:423.0 131:12233.0 132:1190.0 133:272.0 134:106.0 136:146.0 137:50.0 138:74.0 139:25.0 …				467	1156	802	529	2787	1597	958	1005	1510	1669	214	489	608	2051	1128	2186	1230	2050	2436	1622	2608	776	1634	1230	717	381	540	728	1076	302	921	2182	491	550	1175	2199	1226	1295	727	1041
62	247887	85	62	85:10329.0 86:797.0 93:23.0 94:23.0 95:51.0 96:37.0 97:188.0 98:833.0 99:948.0 100:561.0 103:121.0 106:67.0 108:83.0 111:50.0 112:561.0 113:1229.0 114:175.0 126:398.0 127:1435.0 128:239.0 129:25.0 133:70.0 137:28.0 138:21.0 139:36.0 141:48.0 142:36.0 150:16.0 152:31.0 156:33.0 158:25.0 159:25.0 163:24.0 168:30.0 170:61.0 171:15.0 177:21.0 182:18.0 188:17.0 225:39.0 260:13.0 269:14.0 302:12.0 410:…				1822	1807	1690	2323	2061	1764	1669	1586	1766	2004	1809	1804	1544	1663	1701	1345	1656	1987	1496	1524	1604	1815	1779	1629	1193	1627	1721	1925	1502	1693	1641	1778	1653	1969	1933	1605	1587	1421	1535	1249
54	773271	211	54	85:140.0 87:92.0 89:160.0 90:47.0 91:84.0 92:62.0 93:44.0 95:89.0 96:65.0 97:51.0 98:85.0 99:148.0 101:318.0 102:96.0 103:554.0 104:97.0 105:197.0 106:55.0 107:141.0 109:613.0 110:53.0 111:178.0 112:36.0 113:329.0 114:68.0 115:233.0 116:114.0 117:88.0 119:216.0 120:38.0 121:121.0 122:27.0 123:82.0 124:15.0 125:104.0 126:73.0 128:197.0 129:1920.0 130:179.0 131:605.0 132:90.0 133:2496.0 134:318.0 1…				442	3055	2181	2787	2820	2980	1294	2494	2168	1572	3147	2410	2818	2370	1973	2692	5341	1673	2654	2918	3280	2843	2751	2476	2462	3227	1855	2616	2439	2346	3772	3271	2461	2869	2281	211	1918	2276	2114	2775
47	354110	85	47	85:9968.0 86:467.0 91:114.0 92:55.0 93:74.0 95:125.0 96:164.0 97:397.0 98:342.0 99:3775.0 100:402.0 101:33.0 106:65.0 111:243.0 112:411.0 113:1171.0 114:139.0 116:33.0 119:31.0 125:44.0 126:478.0 127:6349.0 131:292.0 132:81.0 134:100.0 136:25.0 140:178.0 141:96.0 149:147.0 153:47.0 154:73.0 155:396.0 156:50.0 169:123.0 170:26.0 181:40.0 182:21.0 186:15.0 193:40.0 195:35.0 196:19.0 205:39.0 208:28…				2201	1863	2227	2488	1902	1908	1742	1738	1961	2191	298	1066	1943	2066	1986	1610	2026	1933	1978	2252	1839	1555	1897	2184	1422	2079	2120	1142	1652	2067	2147	2103	2281	2319	2004	1918	1860	1748	2181	1875
